# Supplementary material for: Uncovering Genes with Divergent mRNA-Protein Dynamics in Streptomyces coelicolor
Source: PubMed Central journal article supplement (PMC2367054; doi:10.1371/journal.pone.0002097), 2008-05-07

**This file contains a series of MS/MS fragmentation spectra for single peptide protein hits shown in Figure 5.**

**The list also includes those single peptide hits that were sampled multiple times (i.e. multiple spectral evidence single peptide hits). In such cases, the protein number is repeated as many times as the number of spectra contributing for a given peptide.**

# Protein: SCO0199 [1 of 1]

Protein Quant

Protein ID

Spectra

Summary Statistics

## Spectrum List

| Spectrum      | z | Time   | Prec MW   | Prec m/z | Prec z | Best Sequence      | Modifications            | Conf | Theor MW  | z | 115:114 | %Err | 115:114 |
|---------------|---|--------|-----------|----------|--------|--------------------|--------------------------|------|-----------|---|---------|------|---------|
| 32.1.1.2471.3 | 3 | 46.979 | 1674.8622 | 559.2947 | 3      | IDVTDDK[L]Q[L]A[R] | ITRAQ@N-term, ITRAQ(K)@7 | 99   | 1673.9555 | 3 | 0.8960  | 2.05 | 116     |

## Peptide ID Hypotheses

| Conf | Sc | Prot ID | Sequence           | Modifications               | Theor MW  | Theor m/z | z | ΔMass   |
|------|----|---------|--------------------|-----------------------------|-----------|-----------|---|---------|
| 99   | 18 | 293     | IDVTDDK[L]Q[L]A[R] | ITRAQ@N-term, ITRAQ(K)@7    | 1673.9555 | 558.9925  | 3 | 0.9066  |
| <1   | 8  |         | GGADEDAGSGLTGIR    | ITRAQ@N-term                | 1674.8407 | 559.2875  | 3 | 0.0215  |
| <1   | 8  |         | LGGEFVILAMGLGR     | ITRAQ@N-term, Deamidatio... | 1674.9062 | 559.3094  | 3 | -0.0441 |
| <1   | 8  |         | MKVLKRVTAWGR       | No ITRAQ@N-term, ITRAQ(...  | 1674.9473 | 559.3231  | 3 | -0.0852 |
| <1   | 8  |         | SGESTTAVVAGVNLNL   | ITRAQ@N-term                | 1674.8910 | 559.3043  | 3 | -0.0288 |

## Precursor MS Region

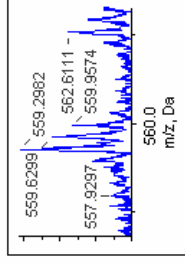

## Fragmentation Evidence for Peptide

ITR |IDVTDDK|ITR|LQ[L]A[R]

| Residue | b         | y         |
|---------|-----------|-----------|
| I       | 258.1934  | 1674.9628 |
| D       | 373.2203  | 1447.7767 |
| V       | 472.2888  | 1302.7498 |
| T       | 573.3364  | 1203.6814 |
| D       | 688.3634  | 1102.6337 |
| D       | 803.3903  | 987.6067  |
| K ITR   | 1075.5873 | 872.5798  |
| L       | 1188.6714 | 600.3828  |
| Q       | 1316.7300 | 487.2987  |
| L       | 1429.8141 | 359.2401  |
| A       | 1500.8512 | 246.1561  |
| R       | 1656.9523 | 175.1190  |

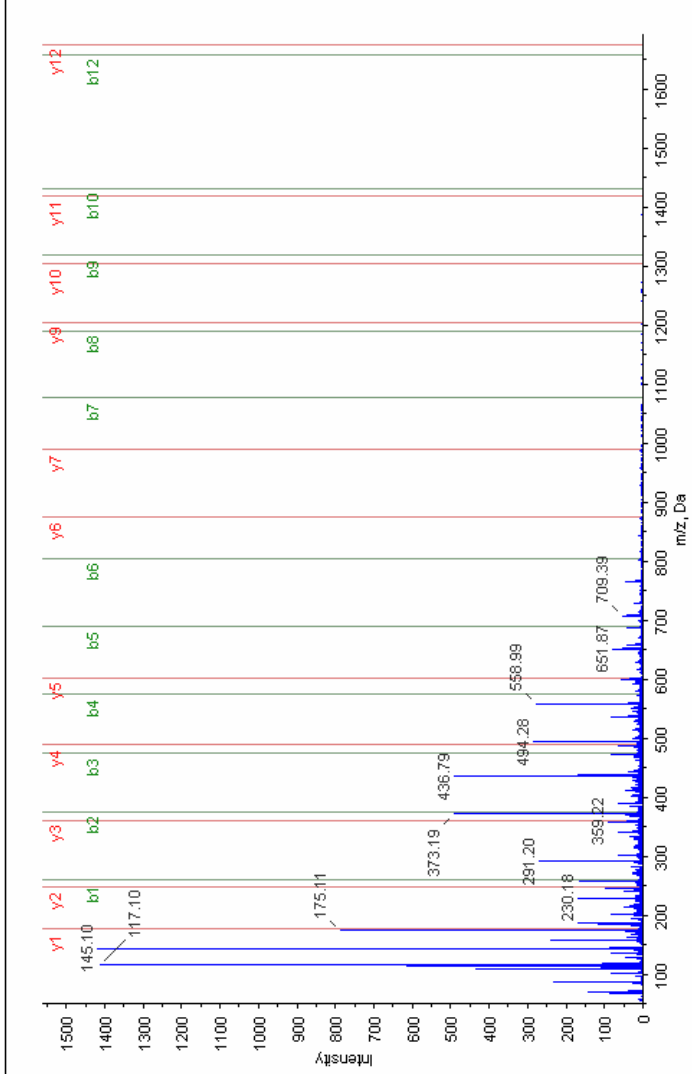

# Protein: SCO1390 [1 of 2]

Protein Quant
Protein ID
Spectra
Summary Statistics

**Spectrum List**

| Spectrum      | Time   | Prec MW   | Prec m/z | Prec z | Best Sequence | Modifications            | Conf | Theor MW  | z | 115:114 | %Err 115:114 |
|---------------|--------|-----------|----------|--------|---------------|--------------------------|------|-----------|---|---------|--------------|
| 29.1.1.1075.3 | 42.843 | 1337.7600 | 669.8873 | 2      | AGESLFLWK     | ITRAQ@N-term, ITRAQ(K)@9 | 99   | 1337.7587 | 2 | 0.6440  | 5.44         |

**Peptide ID Hypotheses**

| Conf | Sc | Prot N | Sequence     | Modifications               | Theor MW  | Theor m/z | z | ΔMass   |
|------|----|--------|--------------|-----------------------------|-----------|-----------|---|---------|
| 99   | 13 | 624    | AGESLFLWK    | ITRAQ@N-term, ITRAQ(K)@9    | 1337.7587 | 669.8867  | 2 | 0.0013  |
| <1   | 7  |        | ASGDGVVFTLK  | No ITRAQ@N-term, ITRAQ(K)@9 | 1337.7313 | 669.8729  | 2 | 0.0287  |
| <1   | 6  |        | ALSRHDDPK    | No ITRAQ@N-term, ITRAQ(K)@9 | 1337.7286 | 669.8716  | 2 | 0.0314  |
| <1   | 6  |        | LTDLITAEIGPV | No ITRAQ@N-term, ITRAQ(K)@9 | 1337.7443 | 669.8794  | 2 | 0.0158  |
| <1   | 6  |        | REYRAINK     | ITRAQ@N-term, Deamidatio... | 1337.7659 | 669.8903  | 2 | -0.0059 |

**Fragmentation Evidence for Peptide**

ITR [AGESLFLWK]ITR

| Res | b         | y         |
|-----|-----------|-----------|
| A   | 216.1465  | 1338.7660 |
| G   | 273.1679  | 1123.6268 |
| E   | 402.2105  | 1066.8053 |
| S   | 489.2425  | 937.5627  |
| L   | 602.3266  | 850.5307  |
| F   | 749.3950  | 737.4467  |
| L   | 862.4791  | 590.3782  |
| YW  | 1048.5584 | 477.2942  |
| KI  | 1320.7554 | 291.2149  |

**Precursor MS Region**

# Protein: SCO1390 [2 of 2]

Protein Quant

Protein ID

Spectra

Summary Statistics

## Spectrum List

| Spectrum      | Time   | Prec MW   | Prec m/z | Prec z | Best Sequence | Modifications            | Conf | Theor MW  | z | 115:114 | %Err 115:114 | 116: |
|---------------|--------|-----------|----------|--------|---------------|--------------------------|------|-----------|---|---------|--------------|------|
| 30.1.1.1055.2 | 43.456 | 1337.7534 | 669.8840 | 2      | AGESLFLWK     | ITRAQ@N-term, ITRAQ(K)@9 | 99   | 1337.7587 | 2 | 0.9557  | 8.31         | 116: |

## Peptide ID Hypotheses

| Conf | Sc | Prot N | Sequence      | Modifications               | Theor MW  | Theor m/z | z | ΔMass   |
|------|----|--------|---------------|-----------------------------|-----------|-----------|---|---------|
| 99   | 13 | 624    | AGESLFLWK     | ITRAQ@N-term, ITRAQ(K)@9    | 1337.7587 | 669.8867  | 2 | -0.0053 |
| <1   | 7  | 135    | QGAIAEFGEK    | ITRAQ@N-term, Deamidatio... | 1337.7071 | 669.8609  | 2 | 0.0463  |
| <1   | 7  |        | QSTTRYVYLIK   | No ITRAQ@N-term, ITRAQ(...  | 1337.7789 | 669.8967  | 2 | -0.0255 |
| <1   | 6  |        | APGAPGAAEQCLR | ITRAQ@N-term                | 1337.7174 | 669.8660  | 2 | 0.0360  |
| <1   | 6  |        | GAESURPHVR    | ITRAQ@N-term                | 1337.7075 | 669.8610  | 2 | 0.0459  |

## Precursor MS Region

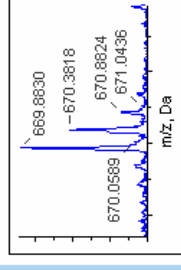

## Fragmentation Evidence for Peptide

ITR AGESLFLWK[ITR]

| Res  | b         | y         |
|------|-----------|-----------|
| A    | 216.1465  | 1338.7660 |
| G    | 273.1679  | 1123.6268 |
| E    | 402.2105  | 1066.6053 |
| S    | 489.2425  | 937.5627  |
| L    | 602.3266  | 850.5307  |
| F    | 749.3950  | 737.4467  |
| L    | 862.4791  | 590.3782  |
| WV   | 1048.5584 | 477.2942  |
| K[I] | 1320.7654 | 291.2149  |

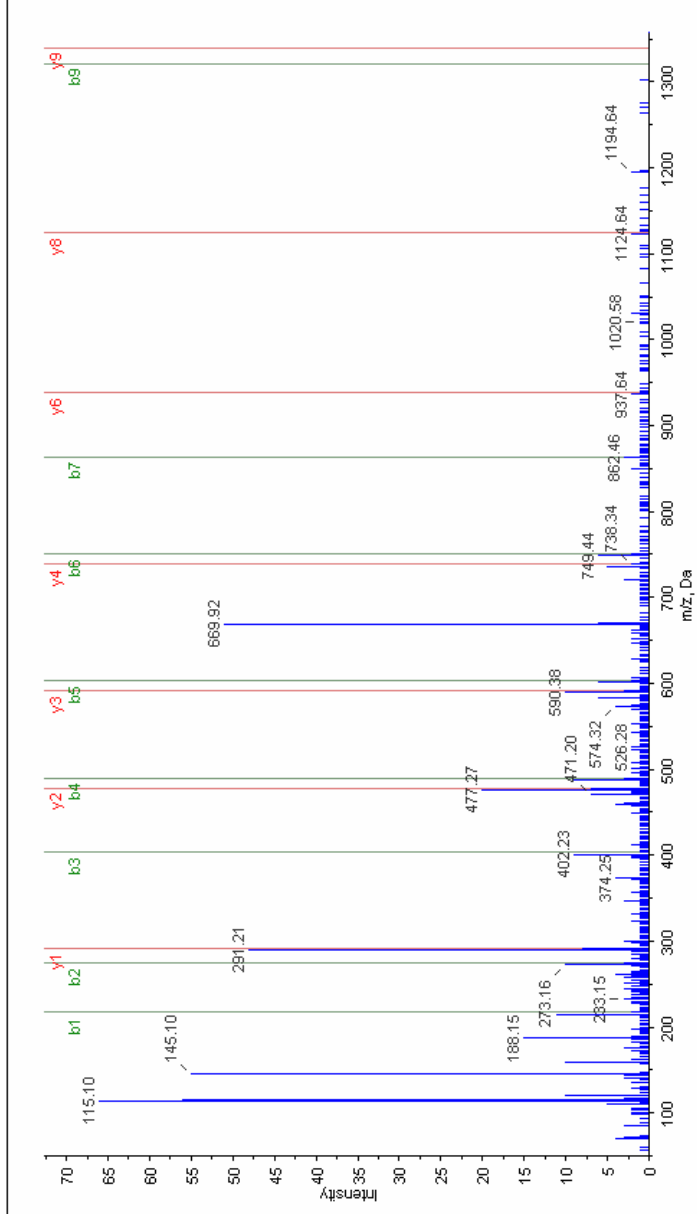

# Protein: SCO1439, HisE [ 1 of 1 ]

Protein Quant

Protein ID

Spectra

Summary Statistics

## Spectrum List

| Spectrum     | Time   | Prec MW   | Prec m/z | Prec z | Best Sequence  | Modifications | Conf | Theor MW  | z | 115:114 | %Err 115:114 | 116: |
|--------------|--------|-----------|----------|--------|----------------|---------------|------|-----------|---|---------|--------------|------|
| 3.1.1.1043.4 | 44.227 | 1345.6940 | 673.8542 | 2      | GI SLDD VY AHL | ITRAQ@N-term  | 99   | 1345.7000 | 2 | 0.8188  | 19.16        | 116: |

## Peptide ID Hypotheses

| Conf | Sc | Prot ID | Sequence        | Modifications                | Theor MW  | Theor m/z | z | ΔMass   |
|------|----|---------|-----------------|------------------------------|-----------|-----------|---|---------|
| 99   | 12 | 633     | GI SLDD VY AHL  | ITRAQ@N-term                 | 1345.7000 | 673.8573  | 2 | -0.0061 |
| <1   | 6  |         | AE CNRTAETLK    | No ITRAQ@N-term, Deamid...   | 1345.7324 | 673.8735  | 2 | -0.0384 |
| <1   | 6  |         | DMNA SAALGPFLLR | No ITRAQ@N-term, Deamid...   | 1345.6627 | 673.8386  | 2 | 0.0313  |
| <1   | 5  |         | GS YD QQGAVNAR  | ITRAQ@N-term, Deamidatio ... | 1345.6709 | 673.8427  | 2 | 0.0231  |
| <1   | 5  |         | LS CEVQELTAR    | ITRAQ@N-term                 | 1345.7324 | 673.8735  | 2 | -0.0384 |

## Precursor MS Region

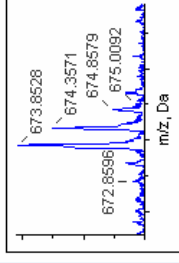

## Fragmentation Evidence for Peptide

ITR | GISLDDVY A HL

| Res | b         | y         |
|-----|-----------|-----------|
| G   | 202.1308  | 1346.7072 |
| I   | 315.2149  | 1145.5837 |
| S   | 402.2469  | 1032.4957 |
| L   | 515.3310  | 945.4676  |
| D   | 630.3579  | 832.3836  |
| D   | 745.3848  | 717.3566  |
| V   | 844.4533  | 602.3257  |
| Y   | 1007.5166 | 503.2613  |
| A   | 1076.5537 | 340.1979  |
| H   | 1215.6126 | 269.1608  |
| L   | 1328.6967 | 132.1019  |

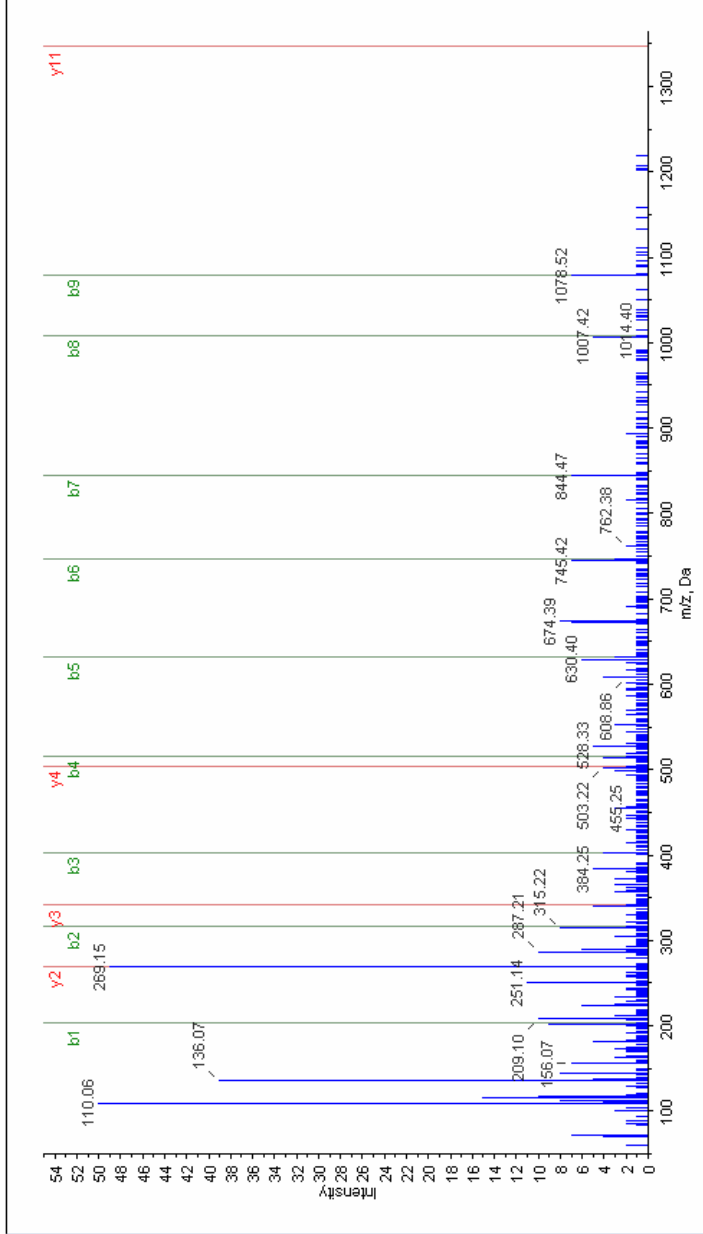

# Protein: SCO1461, GuaB2 [1 of 1]

Protein Quant

Protein ID

Spectra

Summary Statistics

## Spectrum List

| Spectrum      | Time   | Prec MW   | Prec m/z | Prec z | Best Sequence            | Modifications | Conf | Theor MW  | z | 115:114 | %Err 115:114 |
|---------------|--------|-----------|----------|--------|--------------------------|---------------|------|-----------|---|---------|--------------|
| 12.1.1.2283.3 | 43.195 | 1352.6838 | 677.3542 | 2      | ALFEEGI <sup>1</sup> STR | ITRAQ@N-term  | 99   | 1352.7058 | 2 | 0.8799  | 1.81         |

## Peptide ID Hypotheses

| Conf | Sc | Prot ID | Sequence                                 | Modifications               | Theor MW  | Theor m/z | z | ΔMass   |
|------|----|---------|------------------------------------------|-----------------------------|-----------|-----------|---|---------|
| 99   | 14 | 355     | ALFEEGI <sup>1</sup> STR                 | ITRAQ@N-term                | 1352.7058 | 677.3602  | 2 | -0.0120 |
| <1   | 11 |         | ASGFLSGYTG <sup>2</sup> AR               | ITRAQ@N-term                | 1352.7171 | 677.3658  | 2 | -0.0232 |
| <1   | 9  |         | AIQAHLD <sup>3</sup> AVR                 | ITRAQ@N-term, Deamidatio... | 1352.7171 | 677.3658  | 2 | -0.0232 |
| <1   | 9  |         | LNTT <sup>4</sup> SHELA <sup>5</sup> IYR | No ITRAQ@N-term             | 1352.7413 | 677.3779  | 2 | -0.0474 |
| <1   | 9  |         | SRGGCTRS <sup>6</sup> SPSR               | No ITRAQ@N-term, MMTS(...   | 1352.6038 | 677.3092  | 2 | 0.0900  |

## Precursor MS Region

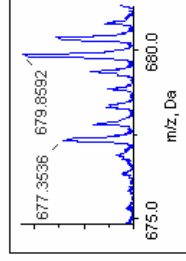

## Fragmentation Evidence for Peptide

ITR ALFEEGI<sup>1</sup>STR

| Residue | b         | y         |
|---------|-----------|-----------|
| A       | 216.1465  | 1353.7131 |
| L       | 329.2305  | 1138.5739 |
| F       | 476.2989  | 1025.4898 |
| E       | 605.3415  | 878.4214  |
| E       | 734.3841  | 749.3788  |
| G       | 791.4056  | 620.3362  |
| I       | 904.4896  | 563.3148  |
| S       | 991.5217  | 460.2307  |
| T       | 1092.5694 | 363.1987  |
| S       | 1179.6014 | 262.1510  |
| R       | 1335.7025 | 175.1190  |

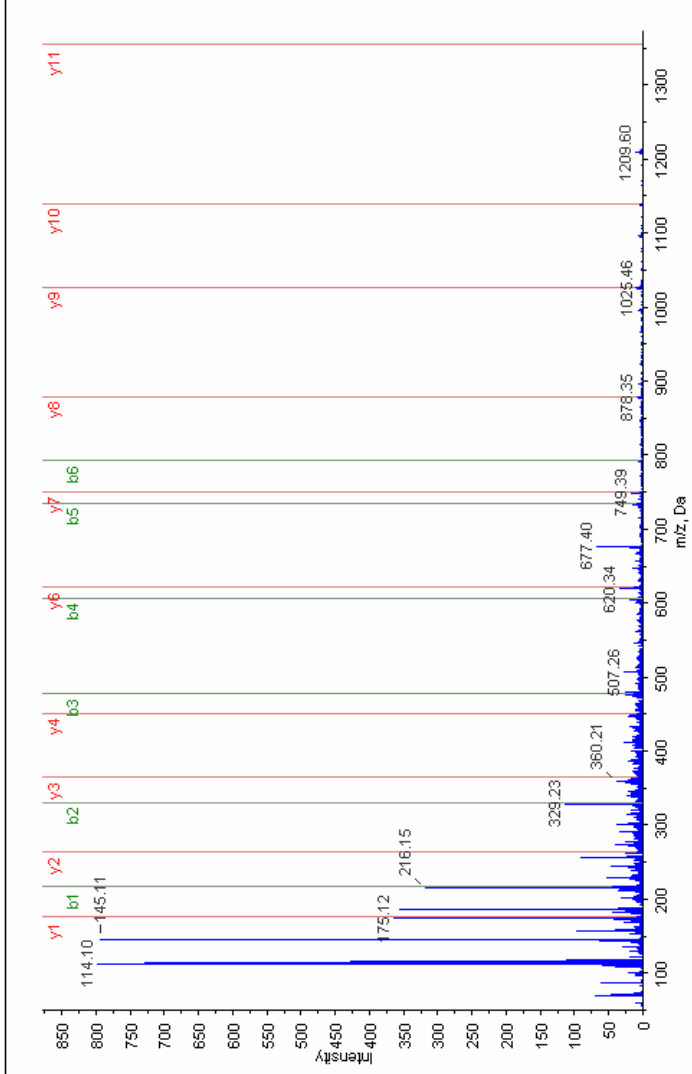

# Protein: SCO15/14, Apt [1 of 1]

Protein Quant

Protein ID

Spectra

Summary Statistics

## Spectrum List

| Spectrum     | Time   | Prec MW   | Prec m/z | Prec z | Best Sequence | Modifications | Conf | Theor MW  | z | 115:114 | %Err 115:114 | 116: |
|--------------|--------|-----------|----------|--------|---------------|---------------|------|-----------|---|---------|--------------|------|
| 3.1.1.1027.4 | 40.536 | 1256.7623 | 629.3884 | 2      | GFILGAPVALR   | ITRAQ@N-term  | 99   | 1256.7727 | 2 | 1.0892  | 9.71         |      |

## Peptide ID Hypotheses

| Conf | Sc | Prot ID | Sequence    | Modifications   | Theor MW  | Theor m/z | z | ΔMass   |
|------|----|---------|-------------|-----------------|-----------|-----------|---|---------|
| 99   | 15 | 647     | GFILGAPVALR | ITRAQ@N-term    | 1256.7727 | 629.3884  | 2 | -0.0104 |
| <1   | 6  | 32      | VVYLAQEEAR  | ITRAQ@N-term    | 1256.7211 | 629.3678  | 2 | 0.0412  |
| <1   | 7  |         | GFLPAPGWLK  | ITRAQ@N-term    | 1256.7152 | 629.3649  | 2 | 0.0471  |
| <1   | 6  |         | LRITARGDLSR | No ITRAQ@N-term | 1256.7314 | 629.3729  | 2 | 0.0310  |
| <1   | 6  |         | RRVITTDIAR  | No ITRAQ@N-term | 1256.7314 | 629.3729  | 2 | 0.0310  |

## Precursor MS Region

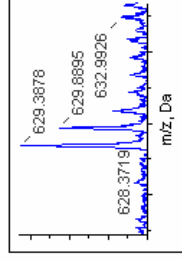

## Fragmentation Evidence for Peptide

ITR GFILGAPVALR

| Res | b         | y         |
|-----|-----------|-----------|
| G   | 202.1308  | 1257.7800 |
| F   | 349.1992  | 1056.6564 |
| I   | 462.2833  | 905.5880  |
| L   | 575.3673  | 796.5039  |
| G   | 632.3888  | 683.4199  |
| A   | 703.4259  | 626.3984  |
| P   | 800.4787  | 555.3613  |
| V   | 899.5471  | 458.3065  |
| A   | 970.5842  | 359.2401  |
| L   | 1083.6683 | 288.2030  |
| R   | 1239.7694 | 175.1190  |

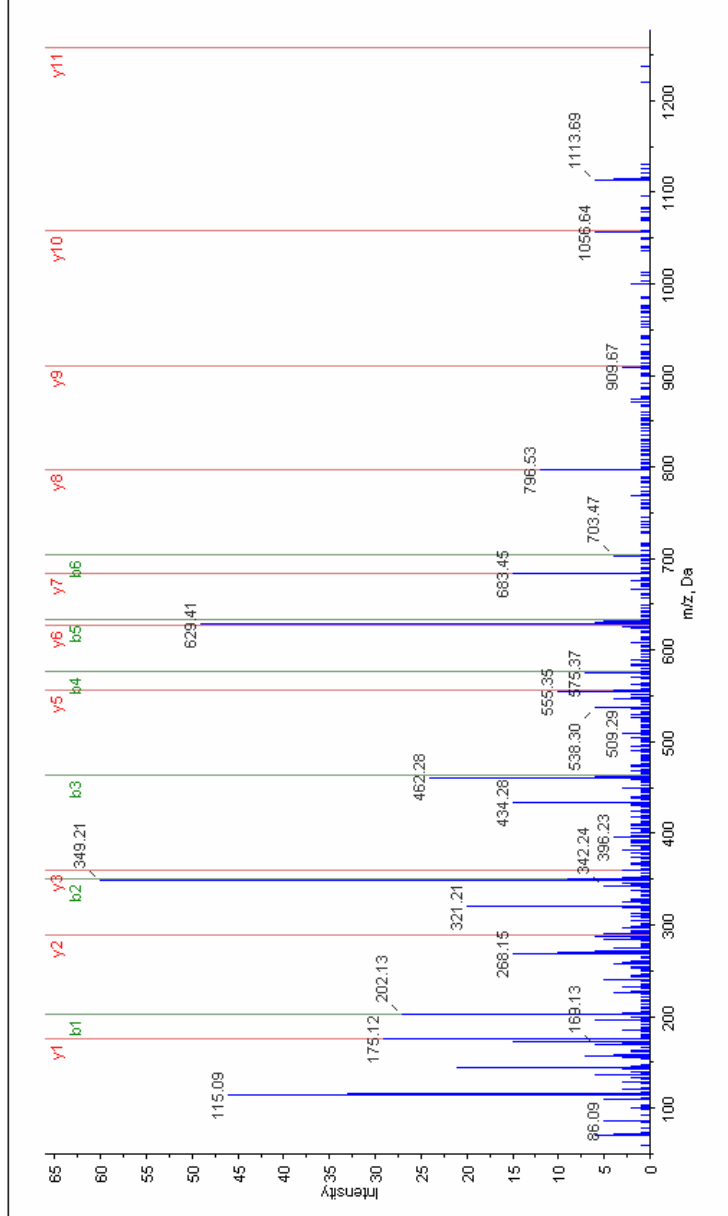

# Protein: SCO1515, SecF [ 1 of 1 ]

Protein Quant

Protein ID

Spectra

Summary Statistics

## Spectrum List

| Spectrum /   | Time   | Prec MW   | Prec m/z | Prec z | Best Sequence | Modifications              | Conf | Theor MW  | z | 115:114 | %Err 115:114 | 116: |
|--------------|--------|-----------|----------|--------|---------------|----------------------------|------|-----------|---|---------|--------------|------|
| 45.1.1.381.3 | 31.127 | 1687.8856 | 563.6358 | 3      | LHHGEVGYD.FVK | ITRAQ@N-term, ITRAQ(K)@... | 99   | 1687.8926 | 3 | 1.3548  | 12.44        | 116: |

## Peptide ID Hypotheses

| Conf | Sc | Prot N / | Sequence        | z | Modifications               | Theor MW  | Theor m/z | z | ΔMass   |
|------|----|----------|-----------------|---|-----------------------------|-----------|-----------|---|---------|
| 99   | 13 | 702      | LHHGEVGYD.FVK   | 3 | ITRAQ@N-term, ITRAQ(K)@...  | 1687.8926 | 563.6381  | 3 | -0.0070 |
| <1   | 6  |          | LLATPRDLR.FFPR  | 3 | No ITRAQ@N-term             | 1687.9635 | 563.6618  | 3 | -0.0779 |
| <1   | 6  |          | LTEMYNELAGN.IIR | 3 | ITRAQ@N-term, Deamidatio... | 1687.8863 | 563.6361  | 3 | -0.0007 |
| <1   | 5  |          | TDDLETAADLPEVR  | 3 | ITRAQ@N-term                | 1687.8387 | 563.6202  | 3 | 0.0469  |
| <1   | 4  |          | ELPPAVDDV.SFEAR | 3 | ITRAQ@N-term                | 1687.8539 | 563.6252  | 3 | 0.0317  |

## Precursor MS Region

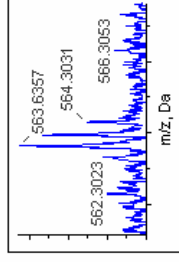

## Fragmentation Evidence for Peptide

ITR [LHHGEVGYD.FVK]ITR

| Res | b         | y         |
|-----|-----------|-----------|
| L   | 258.1934  | 1688.8999 |
| H   | 395.2523  | 1431.7137 |
| H   | 532.3112  | 1294.6548 |
| G   | 589.3327  | 1157.5959 |
| E   | 718.3753  | 1100.5744 |
| V   | 817.4437  | 971.5318  |
| G   | 874.4652  | 872.4634  |
| Y   | 1037.5285 | 815.4420  |
| D   | 1152.5554 | 652.3786  |
| F   | 1289.6238 | 537.3517  |
| V   | 1398.6923 | 390.2833  |
| K/I | 1670.8893 | 291.2149  |

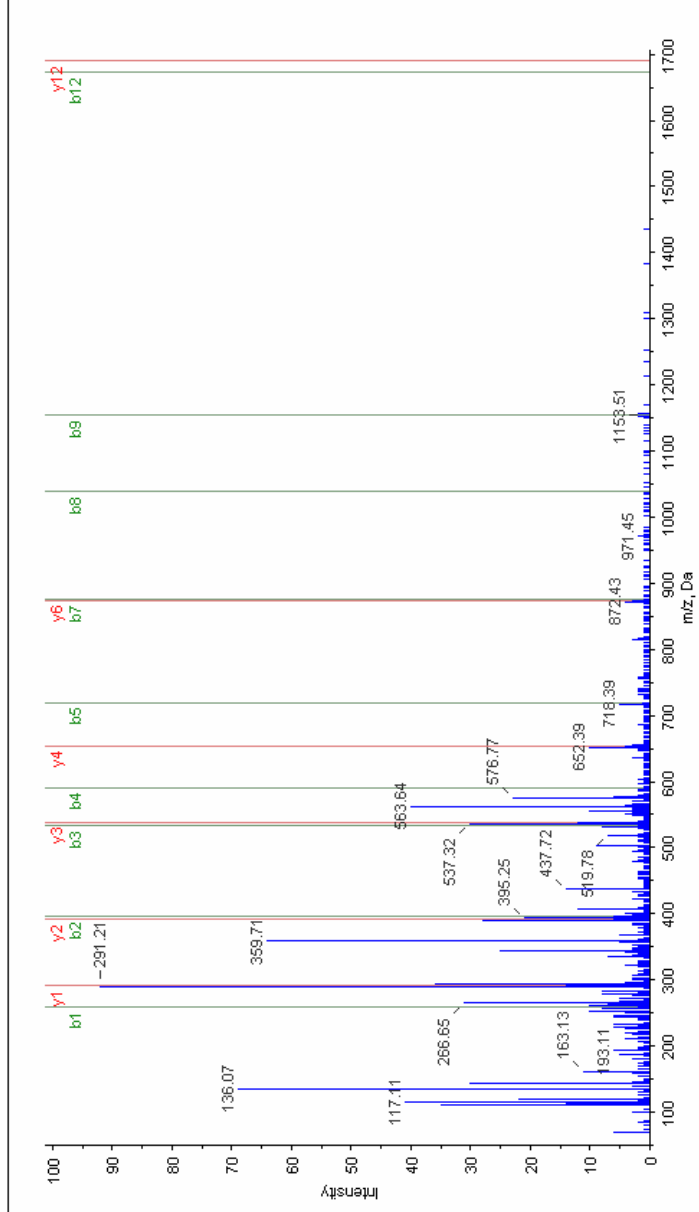



# Protein: SCO1516, SecD [1 of 2]

Protein Quant

Protein ID

Spectra

Summary Statistics

## Spectrum List

| Spectrum      | Time   | Prec MW | Prec m/z | Prec z | Best Sequence | Modifications              | Conf | Theor MW  | z | 115:114 | %Err | 115:114 |
|---------------|--------|---------|----------|--------|---------------|----------------------------|------|-----------|---|---------|------|---------|
| 33.1.1.2318.2 | 40.290 | 0.0000  | 801.4051 | 0      | AVPEAGQESAIHK | ITRAQ@N-term, ITRAQ(K)@... | 99   | 1600.8664 | 2 | 1.0581  | 4.55 | 116     |

## Peptide ID Hypotheses

| Conf | Sc | Prot ID | Sequence                      | Modifications               | Theor MW  | Theor m/z | z | ΔMass   |
|------|----|---------|-------------------------------|-----------------------------|-----------|-----------|---|---------|
| 99   | 14 | 317     | AVPEAGQESAIHK                 | ITRAQ@N-term, ITRAQ(K)@...  | 1600.8664 | 801.4405  | 2 | -0.0708 |
| <1   | 8  |         | AASSGWSFDQFAQAVVEQGVPLLVGEVAR | ITRAQ@N-term, Oxidation(... | 3201.6098 | 801.4097  | 4 | -0.0185 |
| <1   | 8  |         | AVADTLIGRIDGSGTSLIDEVR        | ITRAQ@N-term                | 2401.2534 | 801.4384  | 3 | -0.1000 |
| <1   | 8  |         | LAAEAVAADVRFGR                | No ITRAQ@N-term             | 1600.8798 | 801.4472  | 2 | -0.0841 |
| <1   | 8  |         | LIAEGEILLFPAAYR               | No ITRAQ@N-term             | 1600.8625 | 801.4485  | 2 | -0.0868 |

## Precursor MS Region

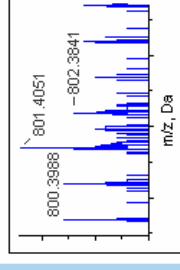

## Fragmentation Evidence for Peptide

ITR |AVPEAGQESAIHK|ITR

| Residue | b         | y         |
|---------|-----------|-----------|
| A       | 216.1465  | 1601.8737 |
| V       | 315.2149  | 1386.7345 |
| P       | 412.2676  | 1287.6661 |
| E       | 541.3102  | 1190.6133 |
| A       | 612.3473  | 1061.5707 |
| G       | 669.3688  | 990.5336  |
| Q       | 797.4274  | 933.5122  |
| E       | 926.4700  | 805.4636  |
| S       | 1013.5020 | 676.4110  |
| A       | 1064.5391 | 589.3790  |
| I       | 1197.6232 | 518.3419  |
| N       | 1311.6661 | 405.2576  |
| K ITR   | 1583.8631 | 291.2149  |

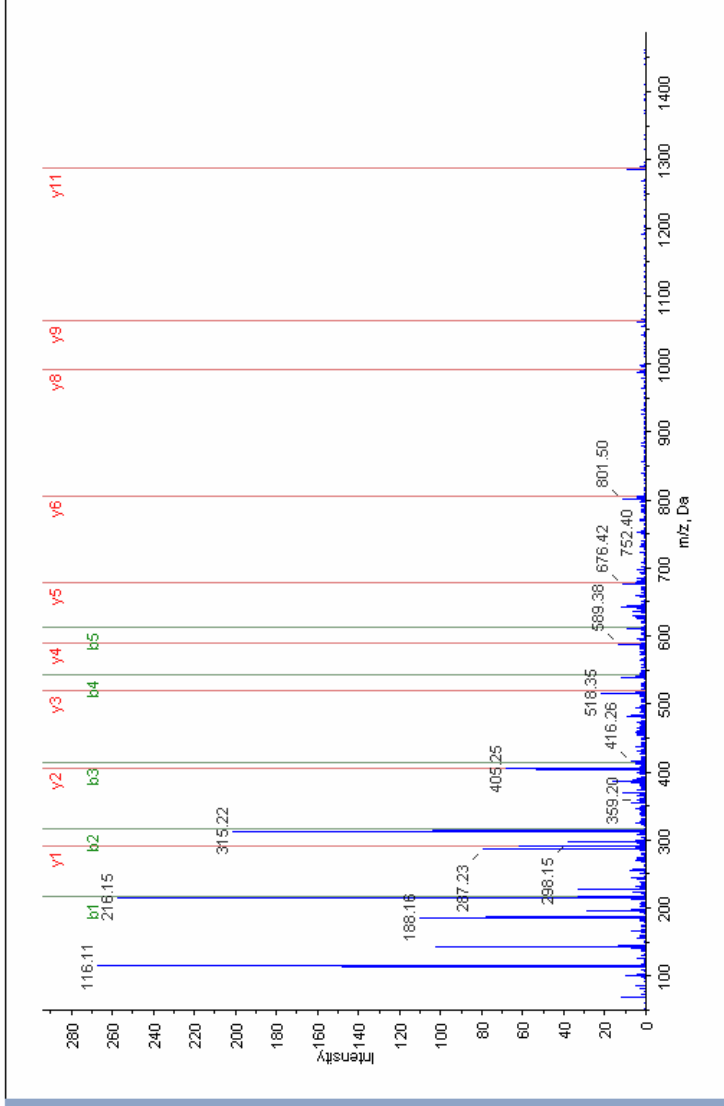

# Protein: SCO1516, SecD [2 of 2]

Protein Quant

Protein ID

Spectra

Summary Statistics

## Spectrum List

| Spectrum      | Time   | Prec MW   | Prec m/z | Prec z | Best Sequence | Modifications              | Conf | Theor MW  | z | 115:114 | %Err | 115:114 |
|---------------|--------|-----------|----------|--------|---------------|----------------------------|------|-----------|---|---------|------|---------|
| 33.1.1.2319.2 | 40.341 | 1600.8800 | 801.4473 | 2      | AVPEAGQESAIWK | ITRAQ@N-term, ITRAQ(K)@... | 99   | 1600.8664 | 2 | 1.0562  | 3.55 | 116     |

## Peptide ID Hypotheses

| Conf | Sc | Prot N | Sequence        | Modifications               | Theor MW  | Theor m/z | z | ΔMass   |
|------|----|--------|-----------------|-----------------------------|-----------|-----------|---|---------|
| 99   | 15 | 317    | AVPEAGQESAIWK   | ITRAQ@N-term, ITRAQ(K)@...  | 1600.8664 | 801.4405  | 2 | 0.0136  |
| <1   | 5  | 336    | EACIPLYFPSCGAAR | ITRAQ@N-term                | 1600.8331 | 801.4238  | 2 | 0.0469  |
| <1   | 8  |        | LAPAEAVAAVDFRGR | No ITRAQ@N-term             | 1600.8798 | 801.4472  | 2 | 0.0002  |
| <1   | 7  |        | AQAPAQQAAPAPAP  | ITRAQ@N-term, Deamidatio... | 1600.8331 | 801.4238  | 2 | 0.0469  |
| <1   | 7  |        | LAVDAAEQTRVFK   | No ITRAQ@N-term, Desamid... | 1600.9019 | 801.4582  | 2 | -0.0219 |

## Precursor MS Region

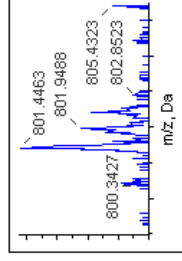

## Fragmentation Evidence for Peptide

ITR |AVPEAGQESAIWK|ITR

| Residue | b         | y         |
|---------|-----------|-----------|
| A       | 216.1465  | 1601.8737 |
| V       | 315.2149  | 1386.7345 |
| P       | 412.2676  | 1287.6661 |
| E       | 541.3102  | 1190.6133 |
| A       | 612.3473  | 1061.5707 |
| G       | 669.3688  | 990.5336  |
| Q       | 787.4274  | 933.5122  |
| E       | 926.4700  | 805.4536  |
| S       | 1013.5020 | 676.4110  |
| A       | 1084.5391 | 589.3790  |
| I       | 1197.6232 | 518.3419  |
| N       | 1311.6661 | 405.2578  |
| K ITR   | 1583.8631 | 291.2149  |

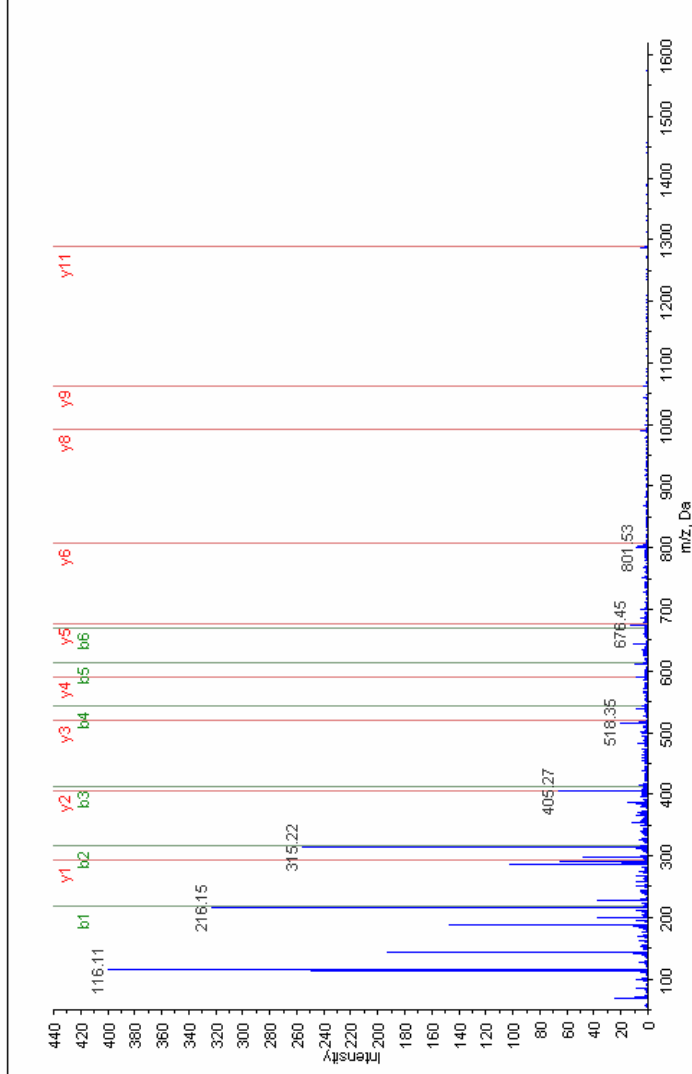

# Protein: SCO1760, LivG [1 of 3]

Protein Quant

Protein ID

Spectra

Summary Statistics

## Spectrum List

| Spectrum      | Time   | Prec MW   | Prec m/z | Prec z | Best Sequence   | Modifications | Conf | Theor MW  | z | 115:114 | %Err  | 115:114 |
|---------------|--------|-----------|----------|--------|-----------------|---------------|------|-----------|---|---------|-------|---------|
| 17.1.1.1198.2 | 42.602 | 1580.9564 | 527.9927 | 3      | TTAAAAPLGIYVEGR | ITRAQ@N-term  | 99   | 1580.9372 | 3 | 0.8420  | 16.01 | 116     |

## Peptide ID Hypotheses

| Conf | Sc | Prot ID | Sequence         | Modifications               | Theor MW  | Theor m/z | z | ΔMass  |
|------|----|---------|------------------|-----------------------------|-----------|-----------|---|--------|
| 99   | 16 | 846     | TTAAAAPLGIYVEGR  | ITRAQ@N-term                | 1580.9372 | 527.9864  | 3 | 0.0192 |
| <1   | 7  |         | LTAPAAALVNA LER  | ITRAQ@N-term, Deamidatio... | 1580.9484 | 527.9901  | 3 | 0.0080 |
| <1   | 6  |         | DYLLAQAAVRI AADR | No ITRAQ@N-term             | 1580.8999 | 527.9739  | 3 | 0.0566 |
| <1   | 6  |         | ERINKELYLDAR     | PGA of E@N-term, ITRAQ(K... | 1580.9120 | 527.9779  | 3 | 0.0444 |
| <1   | 6  |         | IIEGGFVIDVRGGR   | ITRAQ@N-term                | 1580.9120 | 527.9779  | 3 | 0.0444 |

## Precursor MS Region

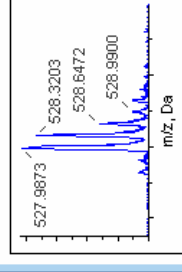

## Fragmentation Evidence for Peptide

ITR TTAAAAPLGIYVEGR

| Res | b         | y         |
|-----|-----------|-----------|
| T   | 246.1570  | 1581.9445 |
| I   | 359.2411  | 1336.7947 |
| A   | 430.2782  | 1223.7106 |
| A   | 501.3153  | 1152.6735 |
| A   | 572.3524  | 1081.6364 |
| A   | 643.3895  | 1010.5993 |
| P   | 740.4423  | 939.5622  |
| L   | 853.5264  | 842.5094  |
| G   | 910.5478  | 729.4254  |
| I   | 1023.6319 | 672.4039  |
| V   | 1122.7003 | 555.3198  |
| V   | 1221.7687 | 460.2514  |
| E   | 1350.8113 | 361.1830  |
| G   | 1407.8328 | 232.1404  |
| R   | 1563.9339 | 175.1190  |

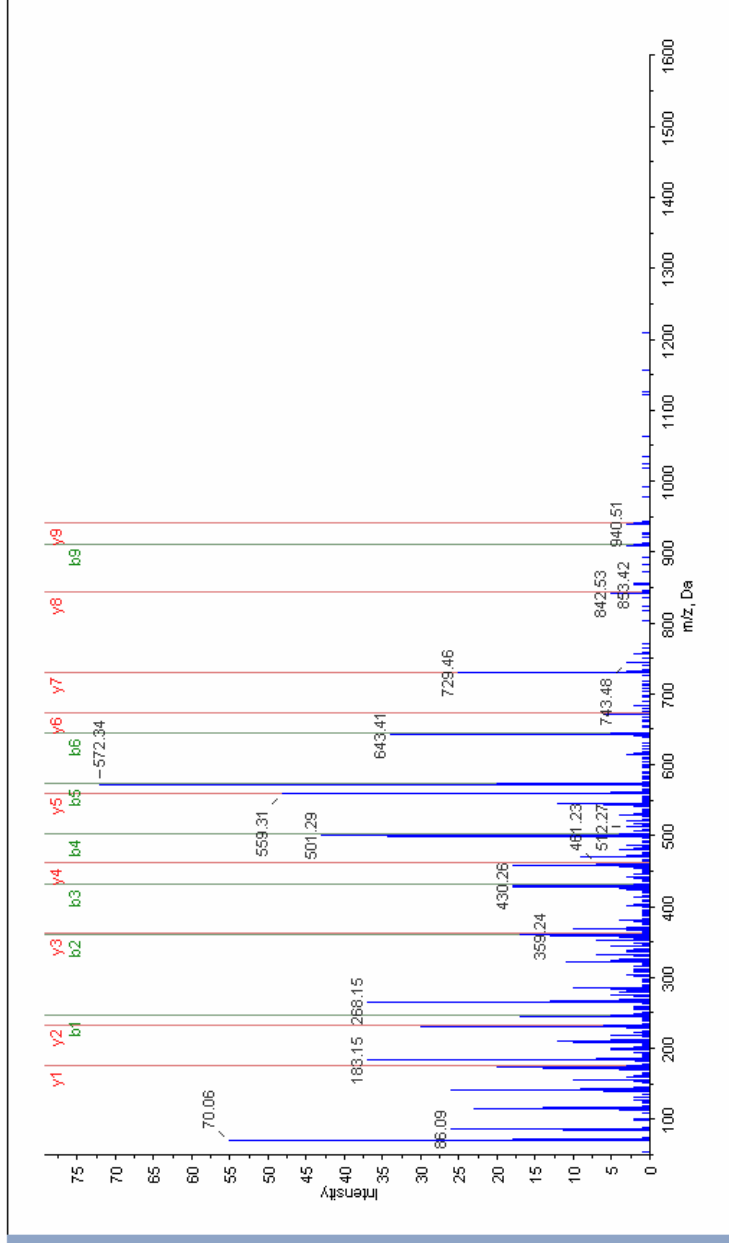

# Protein: SCO1760, LivG [2 of 3]

Protein Quant

Protein ID

Spectra

Summary Statistics

## Spectrum List

| Spectrum      | Time   | Prec MW   | Prec m/z | Prec z | Best Sequence      | Modifications | Conf | Theor MW  | z | 115:114 | %Err | 115:114 |
|---------------|--------|-----------|----------|--------|--------------------|---------------|------|-----------|---|---------|------|---------|
| 17.1.1.1198.5 | 42.755 | 1580.9410 | 527.9876 | 3      | ITIAAAA.PLC.IVVEGR | ITRAQ@N-term  | 99   | 1580.9372 | 3 |         |      | 116     |

## Peptide ID Hypotheses

| Conf | Sc | Prot ID | Sequence           | Modifications               | Theor MW  | Theor m/z | z | ΔMass   |
|------|----|---------|--------------------|-----------------------------|-----------|-----------|---|---------|
| 99   | 14 | 846     | ITIAAAA.PLC.IVVEGR | ITRAQ@N-term                | 1580.9372 | 527.9864  | 3 | 0.0038  |
| <1   | 6  |         | DVLLAQAAVRTAADR    | No ITRAQ@N-term             | 1580.8999 | 527.9739  | 3 | 0.0412  |
| <1   | 6  |         | EGIPLGEYLQAVR      | ITRAQ@N-term                | 1580.9008 | 527.9742  | 3 | 0.0402  |
| <1   | 6  |         | GADPGRVAAAALRGR    | ITRAQ@N-term                | 1580.8981 | 527.9733  | 3 | 0.0429  |
| <1   | 6  |         | LTAPAAALVNALRR     | ITRAQ@N-term, Deamidatio... | 1580.9484 | 527.9901  | 3 | -0.0074 |

## Precursor MS Region

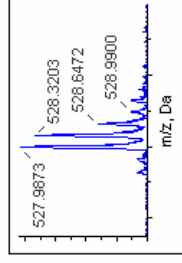

## Fragmentation Evidence for Peptide

ITR ITIAAAA.PLC.IVVEGR

| Res | b         | y         |
|-----|-----------|-----------|
| T   | 246.1570  | 1581.9445 |
| I   | 359.2411  | 1336.7947 |
| A   | 430.2782  | 1223.7106 |
| A   | 501.3153  | 1152.6735 |
| A   | 572.3524  | 1081.6364 |
| A   | 643.3895  | 1010.5993 |
| P   | 740.4423  | 939.5622  |
| L   | 853.5264  | 842.5094  |
| G   | 910.5478  | 729.4254  |
| I   | 1023.6319 | 672.4039  |
| V   | 1122.7003 | 555.3198  |
| V   | 1221.7687 | 460.2514  |
| E   | 1350.8113 | 361.1830  |
| G   | 1407.8328 | 232.1404  |
| R   | 1563.9339 | 175.1190  |

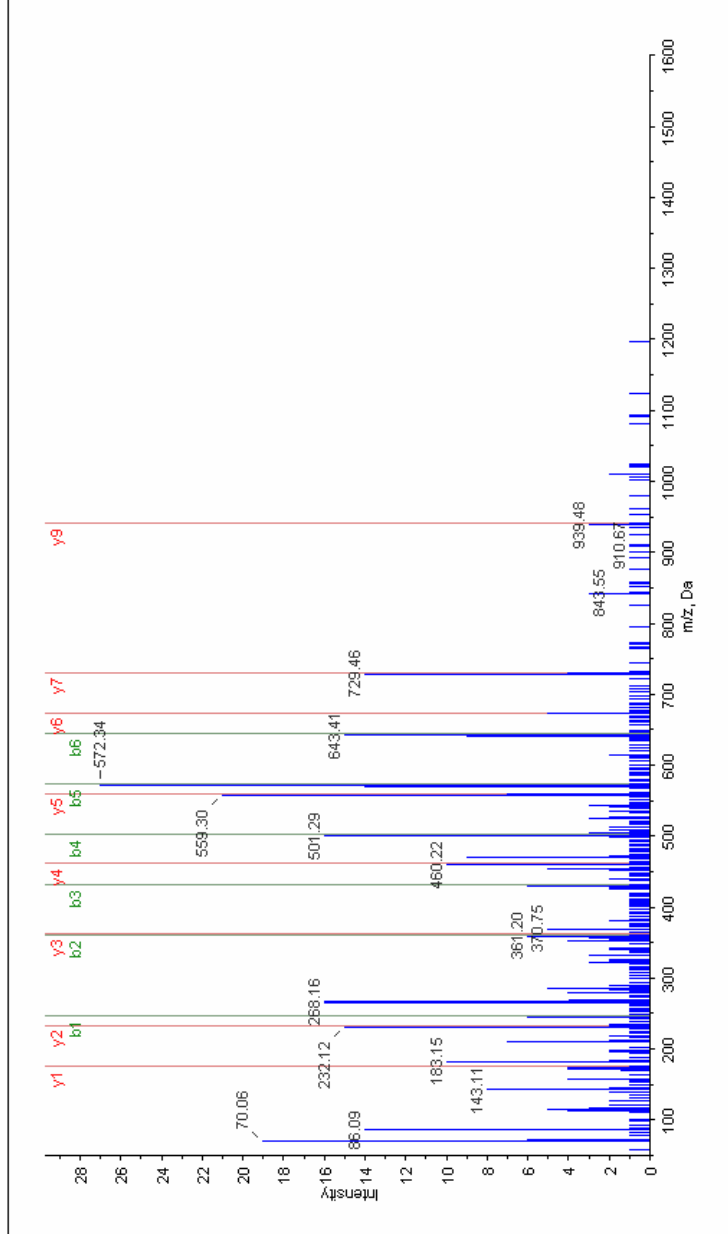

# Protein: SCO1760, LivG [3 of 3]

Protein Quant

Protein ID

Spectra

Summary Statistics

## Spectrum List

| Spectrum      | Time   | Prec MW   | Prec m/z | Prec z | Best Sequence   | Modifications | Conf | Theor MW  | z | 115:114 | %Err | 115:114 |
|---------------|--------|-----------|----------|--------|-----------------|---------------|------|-----------|---|---------|------|---------|
| 17.1.1.1197.2 | 42.422 | 1580.9330 | 527.9849 | 3      | TTAAAAPLGIYVEGR | ITRAQ@N-term  | 99   | 1580.9372 | 3 |         |      | 116     |

## Peptide ID Hypotheses

| Conf | Sc | Prot ID | Sequence        | Modifications               | Theor MW  | Theor m/z | z | ΔMass   |
|------|----|---------|-----------------|-----------------------------|-----------|-----------|---|---------|
| 99   | 16 | 846     | TTAAAAPLGIYVEGR | ITRAQ@N-term                | 1580.9372 | 527.9864  | 3 | -0.0042 |
| <1   | 6  |         | GADPGRVAAAALRGR | ITRAQ@N-term                | 1580.8981 | 527.9733  | 3 | 0.0349  |
| <1   | 5  |         | ASGPSAGRPLPKR   | ITRAQ@N-term, ITRAQ(K)@...  | 1580.9355 | 527.9858  | 3 | -0.0025 |
| <1   | 5  |         | EYPLGSPRAMRVR   | ITRAQ@N-term                | 1580.9055 | 527.9758  | 3 | 0.0275  |
| <1   | 5  |         | LTAPAAALVNALRR  | ITRAQ@N-term, Deamidatio... | 1580.9484 | 527.9901  | 3 | -0.0154 |

## Precursor MS Region

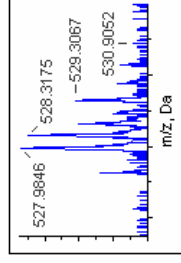

## Fragmentation Evidence for Peptide

ITR TTAAAAPLGIYVEGR

| Res | b         | y         |
|-----|-----------|-----------|
| T   | 246.1570  | 1561.9445 |
| I   | 359.2411  | 1336.7947 |
| A   | 430.2782  | 1223.7106 |
| A   | 501.3153  | 1152.6735 |
| A   | 572.3524  | 1081.6364 |
| A   | 643.3895  | 1010.5993 |
| P   | 740.4423  | 939.5622  |
| L   | 853.5264  | 842.5094  |
| G   | 910.5478  | 729.4254  |
| I   | 1023.6319 | 672.4039  |
| V   | 1122.7003 | 555.3198  |
| V   | 1221.7687 | 460.2514  |
| E   | 1350.8113 | 361.1830  |
| G   | 1407.8328 | 232.1404  |
| R   | 1563.9339 | 175.1190  |

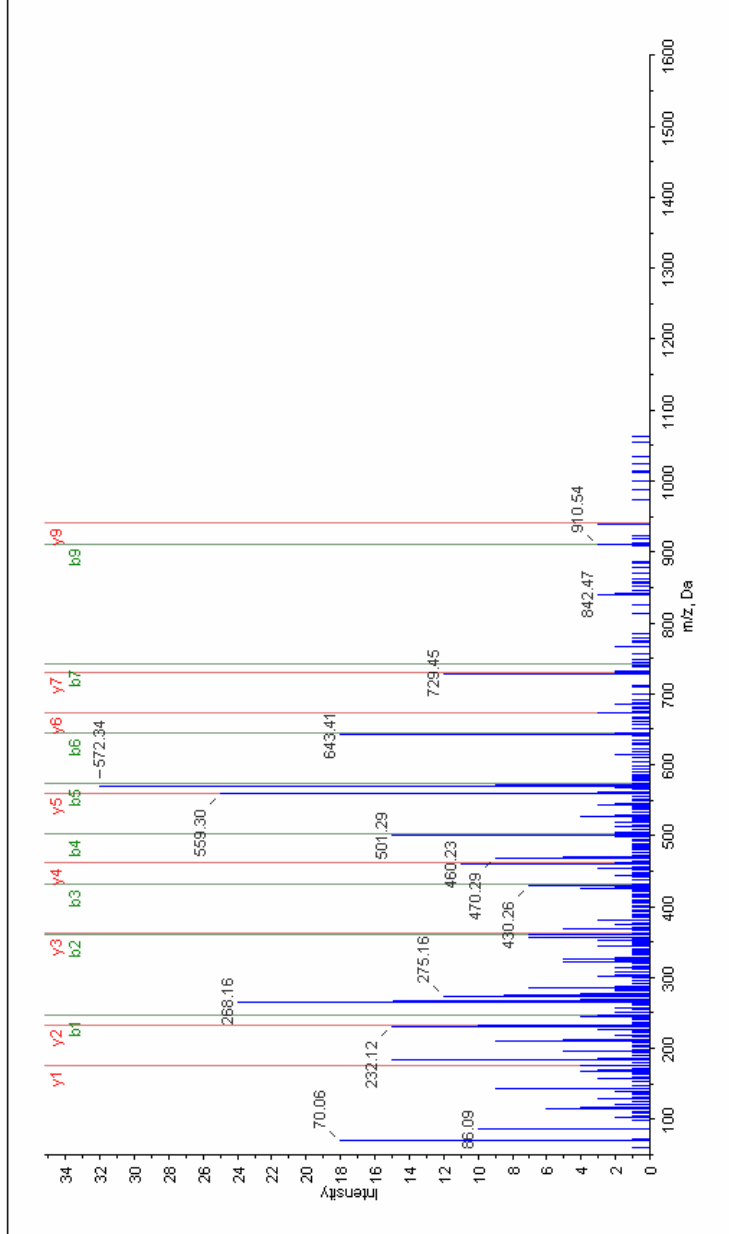

# Protein: SCO1808 [1 of 2]

Protein Quant

Protein ID

Spectra

Summary Statistics

## Spectrum List

| Spectrum      | Time   | Prec MW   | Prec m/z | Prec z | Best Sequence           | Modifications | Conf | Theor MW  | z | 115:114 | %Err | 115:114 |
|---------------|--------|-----------|----------|--------|-------------------------|---------------|------|-----------|---|---------|------|---------|
| 19.1.1.2130.2 | 51.952 | 2333.4148 | 778.8122 | 3      | TALATEAAALGVDIAYVAAGLHR | ITRAQ@N-term  | 99   | 2333.3190 | 3 | 0.8252  | 9.90 | 116     |

## Peptide ID Hypotheses

| Conf | Sc | Prot ID | Sequence                 | Modifications               | Theor MW  | Theor m/z | z | ΔMass  |
|------|----|---------|--------------------------|-----------------------------|-----------|-----------|---|--------|
| 99   | 22 | 357     | TALATEAAALGVDIAYVAAGLHR  | ITRAQ@N-term                | 2333.3190 | 778.7803  | 3 | 0.0958 |
| <1   | 8  |         | LRPDADLILSLDPPGMFVGPP    | No ITRAQ@N-term             | 2333.1839 | 778.7352  | 3 | 0.2309 |
| <1   | 7  |         | AAERLDGYTGAVRD LLGGEAR   | ITRAQ@N-term                | 2333.2211 | 778.7476  | 3 | 0.1937 |
| <1   | 7  |         | AALSFGVRWQYLVNGVRDR      | ITRAQ@N-term, Deamidatio... | 2333.2186 | 778.7468  | 3 | 0.1962 |
| <1   | 7  |         | ALGPMLVTATACASGGTALGTAAR | ITRAQ@N-term, MMTS(O)@...   | 2333.1954 | 778.7391  | 3 | 0.2194 |

## Precursor MS Region

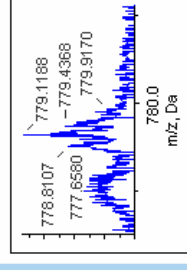

## Fragmentation Evidence for Peptide

ITR |TALATEAAALGVDIAYVAAGLHR

| Residue | b         | y         |
|---------|-----------|-----------|
| T       | 246.1570  | 2334.3262 |
| A       | 317.1941  | 2089.1764 |
| L       | 430.2782  | 2018.1393 |
| A       | 501.3153  | 1905.0552 |
| T       | 602.3630  | 1834.0181 |
| E       | 731.4056  | 1732.9704 |
| A       | 802.4427  | 1603.9279 |
| A       | 873.4798  | 1532.8907 |
| A       | 944.5169  | 1481.8536 |
| L       | 1057.6010 | 1380.8165 |
| G       | 1114.6224 | 1277.7324 |
| V       | 1213.6909 | 1220.7110 |
| D       | 1328.7178 | 1121.6426 |
| I       | 1441.8019 | 1006.6156 |
| A       | 1512.8390 | 893.5316  |
| V       | 1611.9074 | 822.4944  |
| V       | 1710.9758 | 723.4260  |
| A       | 1782.0129 | 624.3576  |
| A       | 1853.0500 | 553.3205  |
| G       | 1910.0715 | 482.2834  |
| L       | 2023.1556 | 425.2619  |
| H       | 2160.2145 | 312.1779  |
| R       | 2316.3156 | 175.1190  |

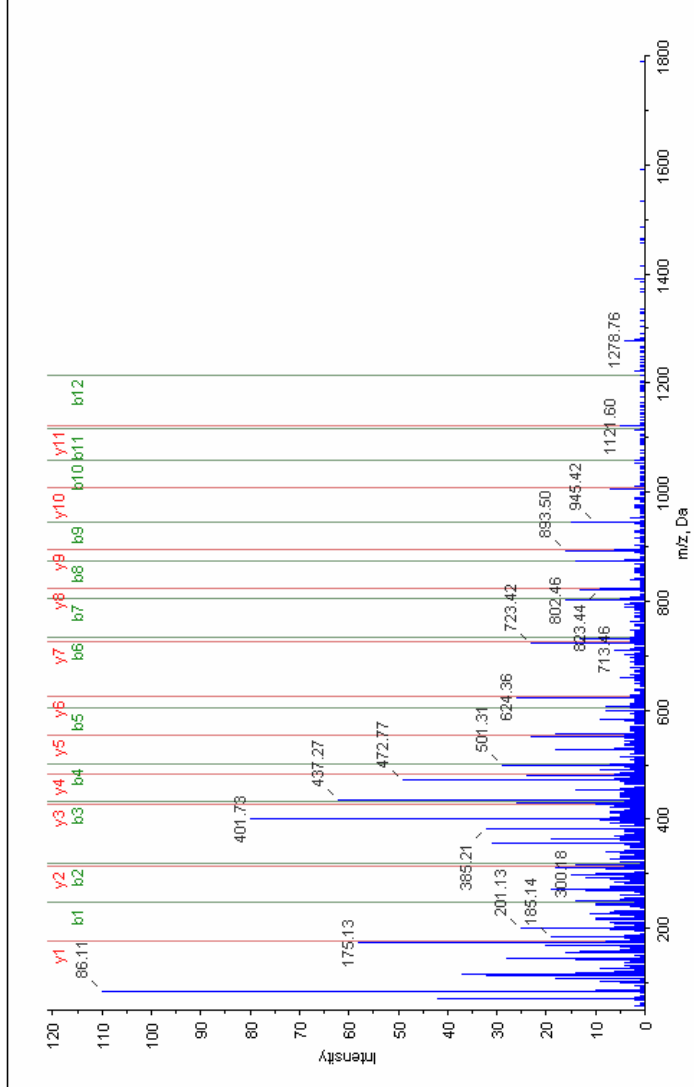

# Protein: SCO1808 [2 of 2]

Protein Quant

Protein ID

Spectra

Summary Statistics

## Spectrum List

| Spectrum      | Time   | Prec MW   | Prec m/z | Prec z | Best Sequence              | Modifications | Conf | Theor MW  | z | 115:114 | %Err | 115:114 |
|---------------|--------|-----------|----------|--------|----------------------------|---------------|------|-----------|---|---------|------|---------|
| 20.1.1.2318.2 | 55.752 | 2333.3909 | 778.8043 | 3      | TA LALTEAAALGVDI AVVAAGLHR | ITRAQ@N-term  | 99   | 2333.3188 | 3 | 0.9024  | 6.75 | 116     |

## Peptide ID Hypotheses

| Conf | Sc | Prot ID | Sequence                 | Modifications              | Theor MW  | Theor m/z | z | ΔMass  |
|------|----|---------|--------------------------|----------------------------|-----------|-----------|---|--------|
| 99   | 17 | 357     | TALATEAAALGVDI AVVAAGLHR | ITRAQ@N-term               | 2333.3188 | 778.7802  | 3 | 0.0721 |
| <1   | 7  |         | LGGDLAYTVVITILTRLEK      | No ITRAQ@N-term, ITRAQ@... | 2333.3691 | 778.7970  | 3 | 0.0218 |
| <1   | 7  |         | LVHDKMLVRPTTELAAR        | No ITRAQ@N-term, ITRAQ@... | 2333.3413 | 778.7877  | 3 | 0.0496 |
| <1   | 5  |         | AAERLDGYTGAVRDLLGGEAR    | ITRAQ@N-term               | 2333.2209 | 778.7476  | 3 | 0.1700 |
| <1   | 5  |         | AEQQARVAELQLVGLPGAAR     | ITRAQ@N-term               | 2333.3300 | 778.7840  | 3 | 0.0608 |

## Precursor MS Region

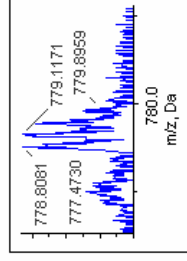

## Fragmentation Evidence for Peptide

ITR | TALATEAAALGVDI AVVAAGLHR

| Residue | b         | y         |
|---------|-----------|-----------|
| T       | 246.1570  | 2334.3262 |
| A       | 317.1941  | 2089.1764 |
| L       | 430.2782  | 2018.1393 |
| A       | 501.3153  | 1905.0552 |
| T       | 602.3630  | 1834.0181 |
| E       | 731.4056  | 1732.9704 |
| A       | 802.4427  | 1603.9279 |
| A       | 873.4798  | 1532.8907 |
| A       | 944.5169  | 1461.8536 |
| L       | 1057.6010 | 1390.8165 |
| G       | 1114.6224 | 1277.7324 |
| V       | 1213.6909 | 1220.7110 |
| D       | 1328.7178 | 1121.6426 |
| I       | 1441.8019 | 1006.6156 |
| A       | 1512.8390 | 893.5316  |
| V       | 1611.9074 | 822.4944  |
| V       | 1710.9758 | 723.4260  |
| A       | 1782.0129 | 624.3576  |
| A       | 1853.0500 | 553.3205  |
| G       | 1910.0715 | 482.2834  |
| L       | 2023.1556 | 425.2619  |
| H       | 2160.2145 | 312.1779  |
| R       | 2316.3156 | 175.1190  |

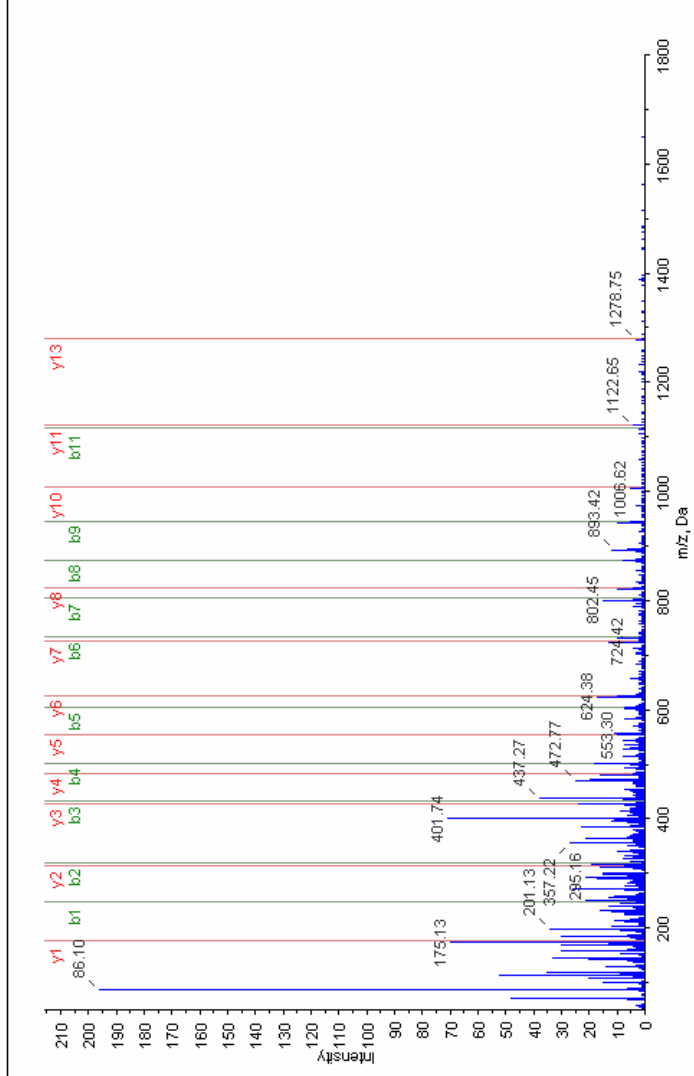

# Protein: SCO2010 [1 of 1]

Protein Quant

Protein ID

Spectra

Summary Statistics

## Spectrum List

| Spectrum     | Time   | Prec MW   | Prec m/z | Prec z | Best Sequence   | Modifications              | Conf | Theor MW  | z | 115:114 | %Err 115:114 |
|--------------|--------|-----------|----------|--------|-----------------|----------------------------|------|-----------|---|---------|--------------|
| 42.1.1.967.4 | 33.472 | 2273.2246 | 758.7486 | 3      | KLEFHEDEAPAVLSK | ITRAQ@N-term, ITRAQ(K)@... | 99   | 2273.2270 | 3 | 1.3661  | 26.32        |

## Peptide ID Hypotheses

| Conf | Sc | Prot ID | Sequence           | Modifications              | Theor MW  | Theor m/z | z | ΔMass   |
|------|----|---------|--------------------|----------------------------|-----------|-----------|---|---------|
| 99   | 12 | 781     | KLEFHEDEAPAVLSK    | ITRAQ@N-term, ITRAQ(K)@... | 2273.2270 | 758.7486  | 3 | -0.0024 |
| <1   | 5  |         | RACHGWFMSPEVLDIARK | No ITRAQ@N-term, ITRAQ(... | 2273.1532 | 758.7250  | 3 | 0.0714  |
| <1   | 4  |         | TDRLKALQSGIVLTGYEK | ITRAQ@N-term, ITRAQ(K)@... | 2273.2835 | 758.7684  | 3 | -0.0589 |

## Precursor MS Region

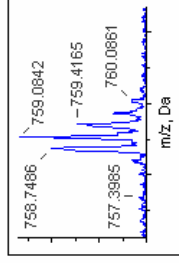

## Fragmentation Evidence for Peptide

ITR [K]ITRLEFHEDEAPAVLSK[ITR]

| Res | b         | y         |
|-----|-----------|-----------|
| K   | 417.3064  | 2274.2342 |
| L   | 530.3904  | 1857.9351 |
| E   | 659.4330  | 1744.8510 |
| F   | 805.5014  | 1615.8084 |
| H   | 943.5603  | 1488.7400 |
| E   | 1072.6029 | 1331.6811 |
| E   | 1201.6455 | 1202.6385 |
| D   | 1316.6725 | 1073.5959 |
| E   | 1445.7151 | 958.5680  |
| A   | 1516.7522 | 829.5264  |
| P   | 1613.8049 | 758.4893  |
| A   | 1684.8421 | 661.4365  |
| V   | 1783.9105 | 590.3994  |
| L   | 1896.9945 | 491.3310  |
| S   | 1984.0266 | 378.2469  |
| K   | 2256.2236 | 291.2140  |

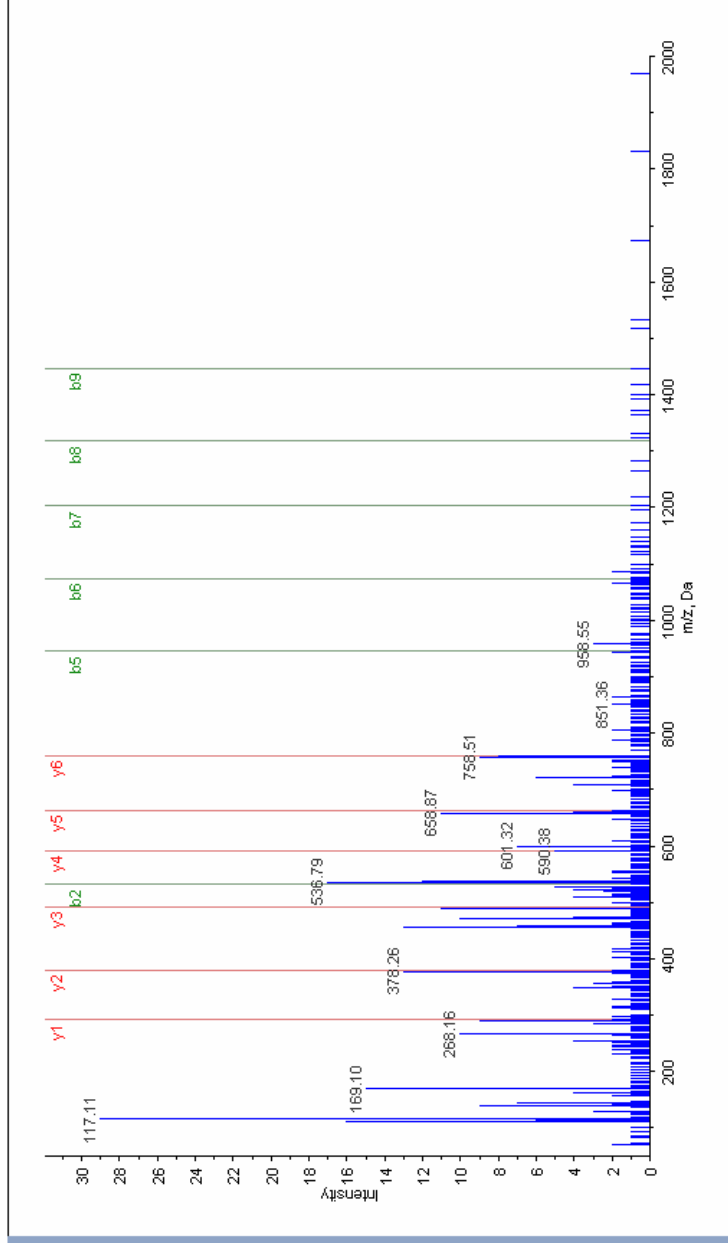



# Protein: SCO2012, LivF [1 of 2]

Protein Quant

Protein ID

Spectra

Summary Statistics

## Spectrum List

| Spectrum     | Time   | Prec MW   | Prec m/z | Prec z | Best Sequence | Modifications | Conf | Theor MW  | z | 115:114 | %Err 115:114 | 116 |
|--------------|--------|-----------|----------|--------|---------------|---------------|------|-----------|---|---------|--------------|-----|
| 5.1.1.2108.3 | 45.366 | 1436.7739 | 719.3942 | 2      | AYDLFPILGER   | ITRAQ@N-term  | 99   | 1436.7786 | 2 | 1.5339  | 3.57         | 116 |

## Peptide ID Hypotheses

| Conf | Sc | Prot ID | Sequence       | Modifications                | Theor MW  | Theor m/z | z | ΔMass   |
|------|----|---------|----------------|------------------------------|-----------|-----------|---|---------|
| 99   | 14 | 427     | AYDLFPILGER    | ITRAQ@N-term                 | 1436.7786 | 719.3966  | 2 | -0.0047 |
| <1   | 7  |         | AADVLTALTGMR   | ITRAQ@N-term, Oxidation(...) | 1436.7415 | 719.3781  | 2 | 0.0324  |
| <1   | 7  |         | ATPDELELHR     | ITRAQ@N-term                 | 1436.7746 | 719.3945  | 2 | -0.0006 |
| <1   | 7  |         | HPEVVEGAA SAAR | ITRAQ@N-term                 | 1436.7494 | 719.3820  | 2 | 0.0245  |
| <1   | 7  |         | SE SMRLRYR     | ITRAQ@N-term                 | 1436.7970 | 719.4058  | 2 | -0.0231 |

## Precursor MS Region

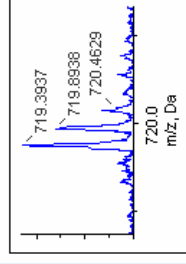

## Fragmentation Evidence for Peptide

ITR AYDLFPILGER

| Residue | b         | y         |
|---------|-----------|-----------|
| A       | 216.1465  | 1437.7858 |
| Y       | 379.2098  | 1222.6467 |
| D       | 494.2367  | 1059.5833 |
| L       | 607.3208  | 944.5564  |
| F       | 754.3892  | 831.4723  |
| P       | 851.4420  | 684.4039  |
| I       | 964.5260  | 587.3511  |
| L       | 1077.6101 | 474.2671  |
| G       | 1134.6316 | 361.1830  |
| E       | 1263.6742 | 304.1615  |
| R       | 1419.7753 | 175.1190  |

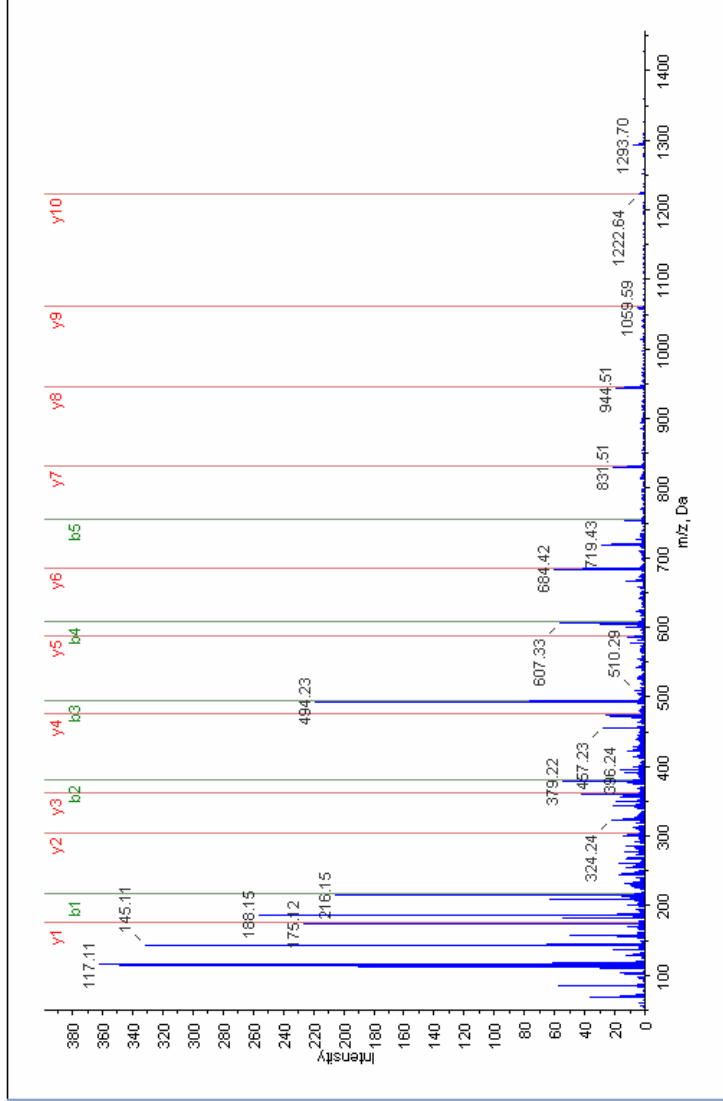

# Protein: SCO2012, LivF [1 of 2]

Protein Quant

Protein ID

Spectra

Summary Statistics

## Spectrum List

| Spectrum     | Time   | Prec MW   | Prec m/z | Prec z | Best Sequence | Modifications | Conf | Theor MW  | z | 115:114 | %Err | 115:114 |
|--------------|--------|-----------|----------|--------|---------------|---------------|------|-----------|---|---------|------|---------|
| 9.1.1.2080.3 | 45.112 | 1436.7689 | 719.3917 | 2      | AYDLFFILGER   | ITRAQ@N-term  | 99   | 1436.7786 | 2 | 1.5371  | 2.10 | 116     |

## Peptide ID Hypotheses

| Conf | Sc | Prot ID | Sequence        | Modifications   | Theor MW  | Theor m/z | z | ΔMass   |
|------|----|---------|-----------------|-----------------|-----------|-----------|---|---------|
| 99   | 16 | 427     | AYDLFFILGER     | ITRAQ@N-term    | 1436.7786 | 719.3966  | 2 | -0.0096 |
| <1   | 9  |         | TLAAAAPLGIVVEGR | No ITRAQ@N-term | 1436.8351 | 719.4248  | 2 | -0.0662 |
| <1   | 7  |         | AQTMDQLIAFR     | ITRAQ@N-term    | 1436.7568 | 719.3857  | 2 | 0.0121  |
| <1   | 7  |         | SESNLRLYRR      | ITRAQ@N-term    | 1436.7970 | 719.4058  | 2 | -0.0281 |
| <1   | 7  |         | SGNDWIEVAFR     | ITRAQ@N-term    | 1436.7170 | 719.3658  | 2 | 0.0519  |

## Precursor MS Region

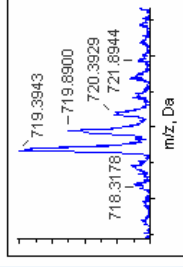

## Fragmentation Evidence for Peptide

ITR AYDLFFILGER

| Residue | b         | y         |
|---------|-----------|-----------|
| A       | 216.1465  | 1437.7858 |
| Y       | 379.2098  | 1222.6467 |
| D       | 494.2367  | 1059.5833 |
| L       | 607.3208  | 944.5564  |
| F       | 754.3892  | 831.4723  |
| P       | 851.4420  | 684.4039  |
| I       | 964.5260  | 587.3511  |
| L       | 1077.6101 | 474.2671  |
| G       | 1134.6316 | 361.1830  |
| E       | 1263.6742 | 304.1615  |
| R       | 1419.7753 | 175.1190  |

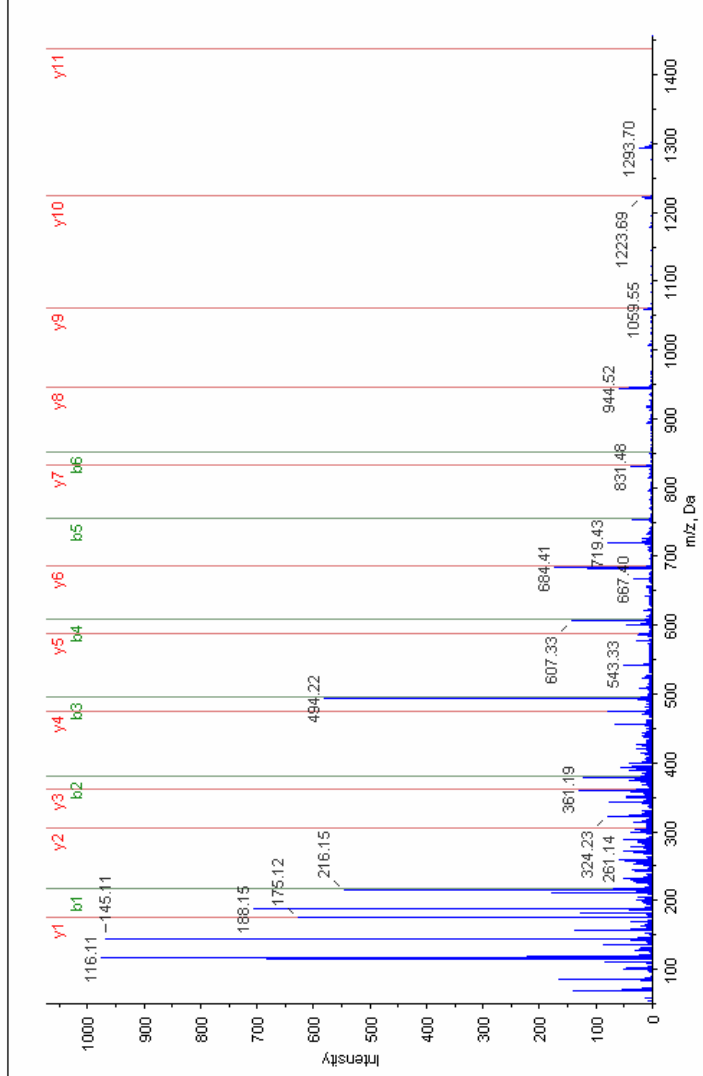

# Protein: SCO2019 [1 of 1]

Protein Quant

Protein ID

Spectra

Summary Statistics

## Spectrum List

| Spectrum    | Time   | Prec MW   | Prec m/z | Prec z | Best Sequence  | Modifications | Conf | Theor MW  | z | 115:114 | %Err 115:114 |
|-------------|--------|-----------|----------|--------|----------------|---------------|------|-----------|---|---------|--------------|
| 9.1.1.934.2 | 25.498 | 1387.6829 | 694.8487 | 2      | IAESNAAGGAPATD | ITRAQ@N-term  | 99   | 1387.6702 | 2 | 1.1772  | 16.87        |

## Peptide ID Hypotheses

| Conf | Sc | Prot N | Sequence       | Modifications               | Theor MW  | Theor m/z | z | ΔMass   |
|------|----|--------|----------------|-----------------------------|-----------|-----------|---|---------|
| 99   | 16 | 960    | IAESNAAGGAPATD | ITRAQ@N-term                | 1387.6702 | 694.8424  | 2 | 0.0127  |
| <1   | 8  |        | GQAEAAQR       | ITRAQ@N-term, Deamidatio... | 1387.6927 | 694.8536  | 2 | -0.0098 |
| <1   | 8  |        | TGELDTLMDALAR  | No ITRAQ@N-term             | 1387.6944 | 694.8545  | 2 | -0.0115 |
| <1   | 7  |        | FVRGDATDPAALR  | No ITRAQ@N-term             | 1387.7209 | 694.8678  | 2 | -0.0380 |
| <1   | 7  |        | MTFNAAAGFRR    | ITRAQ@N-term                | 1387.7113 | 694.8629  | 2 | -0.0284 |

## Precursor MS Region

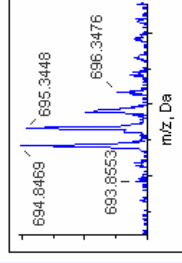

## Fragmentation Evidence for Peptide

ITR | IAESNAAGGAPATD

| Res | b         | y         |
|-----|-----------|-----------|
| I   | 258.1934  | 1388.6774 |
| A   | 329.2305  | 1131.4913 |
| E   | 458.2731  | 1060.4542 |
| S   | 545.3051  | 931.4116  |
| N   | 659.3481  | 844.3795  |
| A   | 730.3852  | 730.3366  |
| A   | 801.4223  | 659.2995  |
| G   | 858.4438  | 588.2624  |
| G   | 915.4652  | 531.2409  |
| A   | 986.5023  | 474.2195  |
| P   | 1083.5551 | 403.1823  |
| A   | 1154.5922 | 306.1296  |
| T   | 1255.6399 | 235.0925  |
| D   | 1370.6668 | 134.0448  |

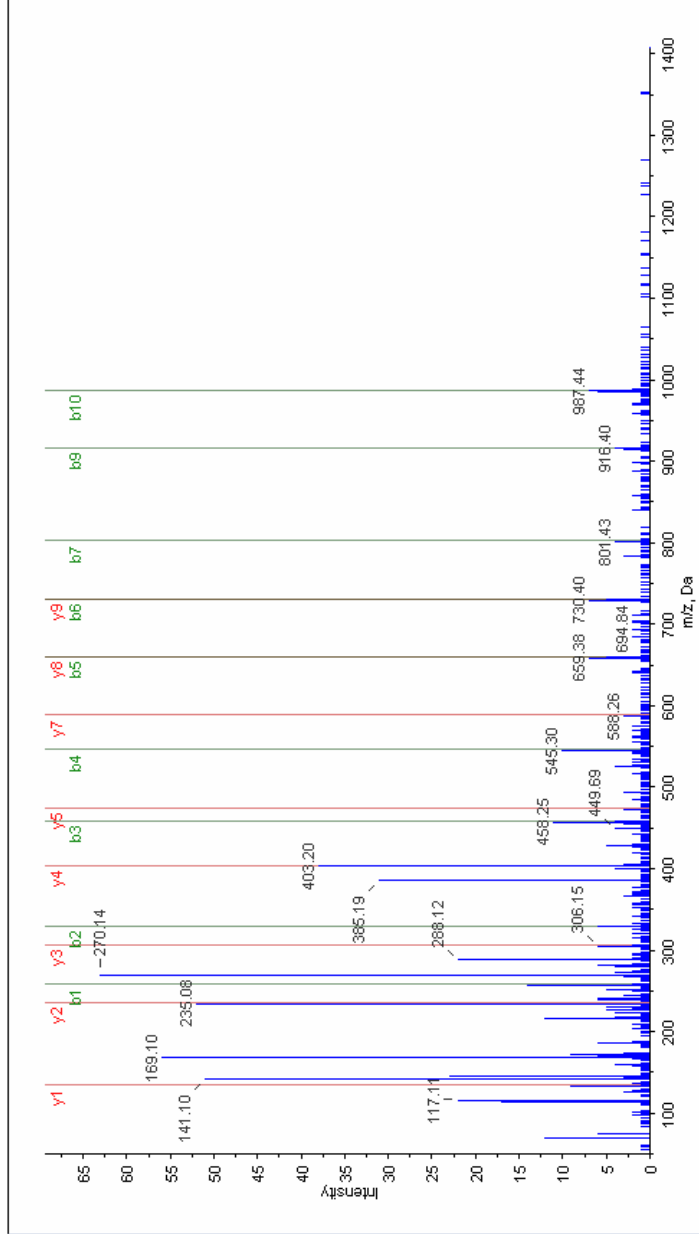

# Protein: SCO2039, TrpC1 [1 of 1]

Protein Quant

Protein ID

Spectra

Summary Statistics

## Spectrum List

| Spectrum      | Time   | Prec MW   | Prec m/z | Prec z | Best Sequence     | Modifications | Theor MW  | Theor z | 115:114 | %Err 115:114 | 116: |
|---------------|--------|-----------|----------|--------|-------------------|---------------|-----------|---------|---------|--------------|------|
| 50.1.1.1019.3 | 36.537 | 1749.9415 | 584.3211 | 3      | TAVSDLVAAAGEHPALR | ITRAQ@N-term  | 1749.9496 | 3       | 2.1929  | 23.40        |      |

## Peptide ID Hypotheses

| Conf | Sc | Prot ID | Sequence           | Modifications               | Theor MW  | Theor m/z | z | ΔMass   |
|------|----|---------|--------------------|-----------------------------|-----------|-----------|---|---------|
| 99   | 16 | 850     | TAVSDLVAAAGEHPALR  | ITRAQ@N-term                | 1749.9496 | 584.3238  | 3 | -0.0081 |
| <1   | 7  | 12      | TGEVLSVAVGEGYLGR   | ITRAQ@N-term                | 1749.9384 | 584.3201  | 3 | 0.0031  |
| <1   | 11 |         | EGLRNYAAGANPMA LKR | PGA of E@N-term, Deamida... | 1749.9309 | 584.3176  | 3 | 0.0106  |
| <1   | 7  |         | LGSGEMCRVYLGRS AGR | No ITRAQ@N-term             | 1749.9058 | 584.3092  | 3 | 0.0357  |
| <1   | 7  |         | RSIEEAAFDNIWR      | ITRAQ@N-term                | 1749.8921 | 584.3046  | 3 | 0.0494  |

## Precursor MS Region

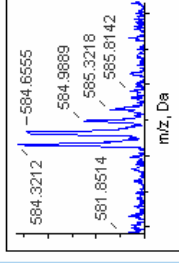

## Fragmentation Evidence for Peptide

ITR TAVSDLVAAAGEHPALR

| Res | b         | y         |
|-----|-----------|-----------|
| T   | 246.1570  | 1750.9568 |
| A   | 317.1941  | 1505.8071 |
| V   | 416.2625  | 1434.7700 |
| S   | 503.2946  | 1335.7015 |
| D   | 618.3215  | 1248.6695 |
| L   | 731.4056  | 1133.6426 |
| V   | 830.4740  | 1020.5585 |
| A   | 901.5111  | 921.4901  |
| A   | 972.5482  | 850.4530  |
| G   | 1029.5637 | 779.4159  |
| E   | 1158.6123 | 722.3844  |
| H   | 1295.6712 | 593.3518  |
| P   | 1392.7240 | 456.2929  |
| A   | 1463.7611 | 359.2401  |
| L   | 1576.8451 | 288.2030  |
| R   | 1732.9462 | 175.1190  |

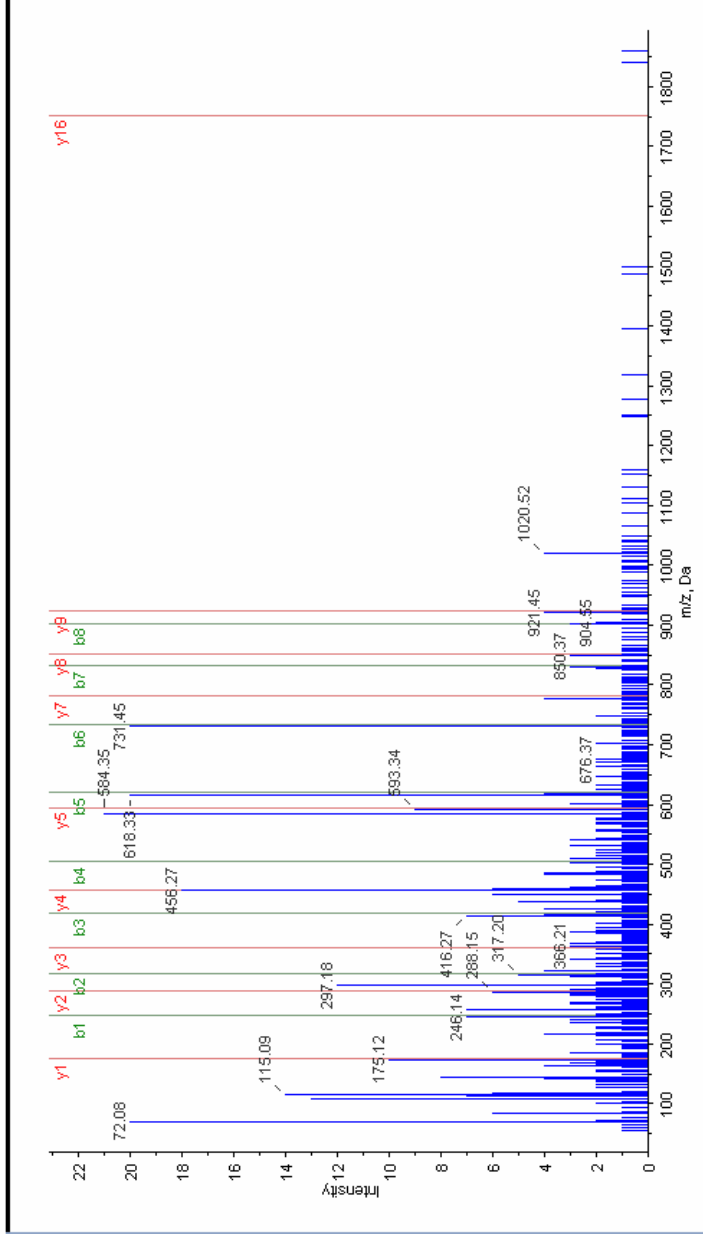

# Protein: SCO2043, TrpE3 [1 of 1]

Protein Quant

Protein ID

Spectra

Summary Statistics

## Spectrum List

| Spectrum     | Time   | Prec MW   | Prec m/z | Prec z | Best Sequence  | Modifications | Conf | Theor MW  | z | 115:114 | %Err  | 115:114 |
|--------------|--------|-----------|----------|--------|----------------|---------------|------|-----------|---|---------|-------|---------|
| 33.1.1.976.4 | 37.778 | 1738.7751 | 580.5980 | 3      | MDVYTHDMDLDTFR | ITRAQ@N-term  | 99   | 1738.7776 | 3 | 1.1680  | 13.74 | 116     |

## Peptide ID Hypotheses

| Conf | Sc | Prot N | Sequence                      | Modifications               | Theor MW  | Theor m/z | z | ΔMass   |
|------|----|--------|-------------------------------|-----------------------------|-----------|-----------|---|---------|
| 99   | 15 | 595    | MDVYTHDMDLDTFR                | ITRAQ@N-term                | 1738.7776 | 580.5988  | 3 | -0.0025 |
| <1   | 6  |        | LA YD A G Q A I D A R N C G R | No ITRAQ@N-term, MMTS(...   | 580.6033  | 580.6033  | 3 | -0.0128 |
| <1   | 5  |        | NV G T S T G P D G A H Y Y R  | ITRAQ@N-term, Deamidatio... | 580.6084  | 580.6084  | 3 | -0.0281 |

## Precursor MS Region

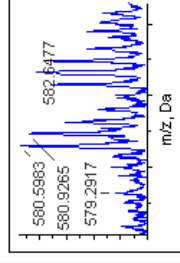

## Fragmentation Evidence for Peptide

ITR MDVYTHDMDLDTFR

| Res | b         | y         |
|-----|-----------|-----------|
| M   | 276.1498  | 1739.7849 |
| D   | 391.1768  | 1464.6424 |
| V   | 490.2452  | 1349.6154 |
| T   | 591.2929  | 1250.5470 |
| H   | 728.3518  | 1149.4993 |
| D   | 843.3787  | 1012.4404 |
| M   | 974.4192  | 897.4135  |
| D   | 1089.4461 | 766.3730  |
| L   | 1202.5302 | 651.3461  |
| D   | 1317.5571 | 538.2620  |
| T   | 1418.6048 | 423.2350  |
| F   | 1565.6732 | 322.1874  |
| R   | 1721.7744 | 175.1190  |

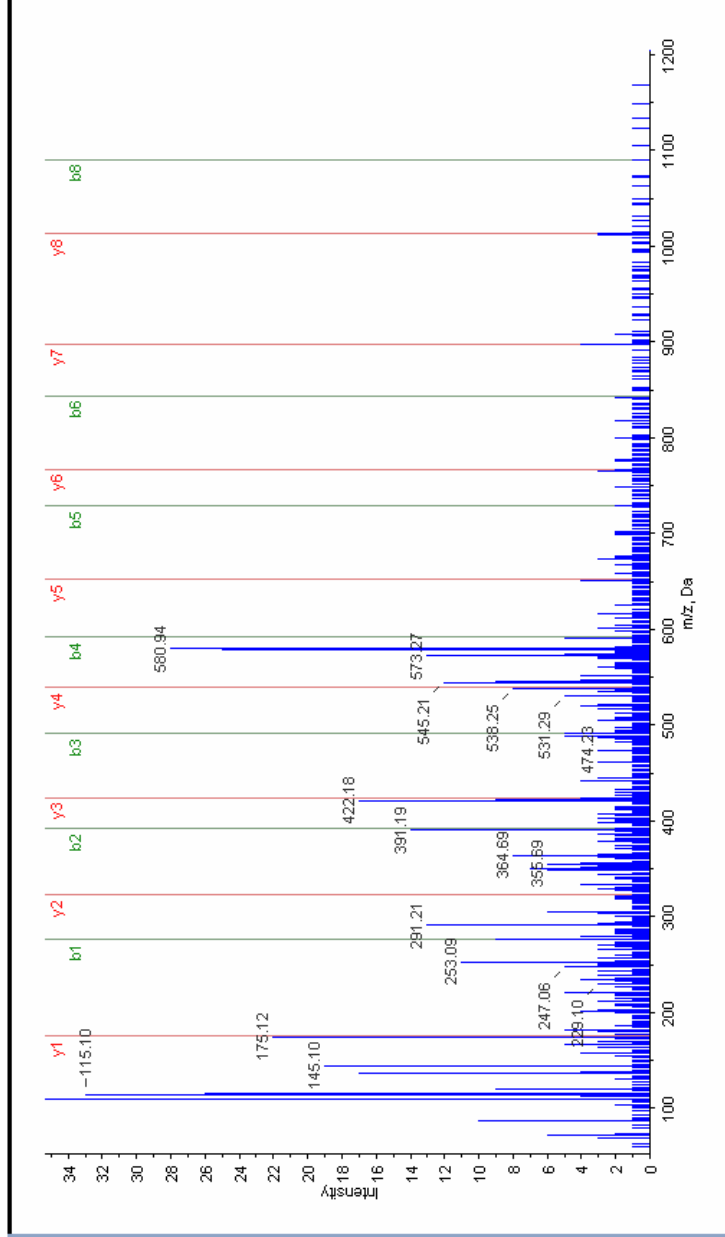

# Protein: SCO2052, HisB [ 1 of 1 ]

Protein Quant

Protein ID

Spectra

Summary Statistics

## Spectrum List

| Spectrum      | Time   | Prec MW   | Prec m/z | Prec z | Best Sequence       | Modifications | Conf | Theor MW  | z | 115:114 | %Err 115:114 |
|---------------|--------|-----------|----------|--------|---------------------|---------------|------|-----------|---|---------|--------------|
| 31.1.1.1076.3 | 49.147 | 2252.1088 | 751.7103 | 3      | TDIATGVGFYDHMLDQLGR | ITRAQ@N-term  | 99   | 2252.1016 | 3 | 1.0629  | 16.70        |

## Peptide ID Hypotheses

| Conf | Sc | Prot ID | Sequence             | Modifications             | Theor MW  | Theor m/z | z | ΔMass   |
|------|----|---------|----------------------|---------------------------|-----------|-----------|---|---------|
| 99   | 15 | 926     | TDIATGVGFYDHMLDQLGR  | ITRAQ@N-term              | 2252.1016 | 751.7078  | 3 | 0.0073  |
| <1   | 6  |         | LDLLDERTVAENFAAHP    | No ITRAQ@N-term           | 2252.1184 | 751.7134  | 3 | -0.0096 |
| <1   | 6  |         | TAAAEQGLRADYVYVHNSDR | No ITRAQ@N-term           | 2252.1144 | 751.7121  | 3 | -0.0055 |
| <1   | 5  |         | LSDGRDPMIREVDTEYGR   | ITRAQ@N-term              | 2252.0976 | 751.7065  | 3 | 0.0113  |
| <1   | 5  |         | SPSETINLVLEGRGAACTLR | ITRAQ@N-term, MMTS(C)@... | 2252.1010 | 751.7076  | 3 | 0.0079  |

## Precursor MS Region

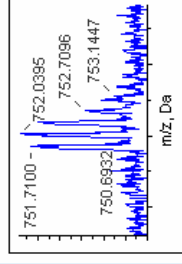

## Fragmentation Evidence for Peptide

ITR |TDIATGVGFYDHMLDQLGR

| Res | b         | y         |
|-----|-----------|-----------|
| T   | 246.1570  | 2253.1090 |
| D   | 361.1840  | 2007.9593 |
| I   | 474.2680  | 1892.9323 |
| A   | 545.3051  | 1779.8483 |
| T   | 646.3528  | 1708.8112 |
| G   | 703.3743  | 1607.7635 |
| V   | 802.4427  | 1550.7420 |
| G   | 859.4642  | 1451.6736 |
| F   | 1006.5326 | 1394.6521 |
| Y   | 1169.5959 | 1247.5837 |
| D   | 1284.6228 | 1084.5204 |
| H   | 1421.6818 | 969.4935  |
| M   | 1552.7222 | 832.4345  |
| L   | 1665.8063 | 701.3941  |
| D   | 1780.8332 | 580.3100  |
| Q   | 1908.8918 | 473.2831  |
| L   | 2021.9759 | 345.2245  |
| G   | 2078.9974 | 232.1404  |
| R   | 2235.0985 | 175.1190  |

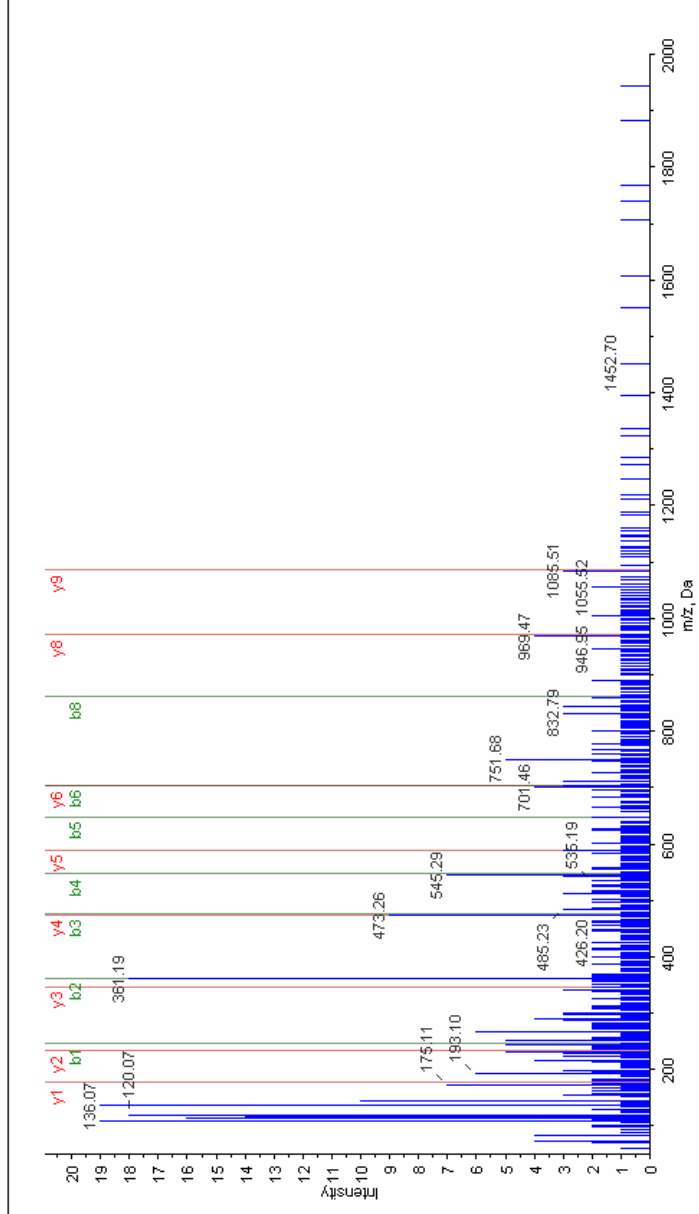

# Protein: SCO2148, QcrB [1 of 1]

Protein Quant

Protein ID

Spectra

Summary Statistics

## Spectrum List

| Spectrum      | Time   | Prec MW   | Prec m/z | Prec z | Best Sequence | Modifications            | Conf | Theor MW  | z | 115:114 | %Err | 115:114 |
|---------------|--------|-----------|----------|--------|---------------|--------------------------|------|-----------|---|---------|------|---------|
| 29.1.1.1048.2 | 36.566 | 1151.7168 | 576.8657 | 2      | LGITYSLAK     | ITRAQ@N-term, ITRAQ(K)@8 | 99   | 1151.7158 | 2 | 0.7467  | 5.12 | 116     |

## Peptide ID Hypotheses

| Conf | Sc | Prot ID | Sequence  | Modifications            | Theor MW  | Theor m/z | z | ΔMass   |
|------|----|---------|-----------|--------------------------|-----------|-----------|---|---------|
| 99   | 12 | 851     | LGITYSLAK | ITRAQ@N-term, ITRAQ(K)@8 | 1151.7158 | 576.8652  | 2 | 0.0010  |
| <1   | 6  | 4       | ITTYRLAK  | ITRAQ@N-term, ITRAQ(K)@7 | 1151.7270 | 576.8708  | 2 | -0.0102 |
| <1   | 6  |         | IGTFYEAK  | ITRAQ@N-term, ITRAQ(K)@8 | 1151.6794 | 576.8470  | 2 | 0.0374  |
| <1   | 5  |         | IGNTLHVYR | ITRAQ@N-term             | 1151.6697 | 576.8521  | 2 | 0.0271  |
| <1   | 5  |         | LLEILLHDR | ITRAQ@N-term             | 1151.6785 | 576.8465  | 2 | 0.0383  |

## Precursor MS Region

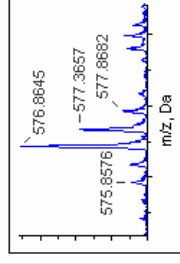

## Fragmentation Evidence for Peptide

ITR | LGITYSLAK(ITR)

| Res | b         | y         |
|-----|-----------|-----------|
| L   | 258.1934  | 1152.7231 |
| C   | 315.2149  | 895.5369  |
| I   | 428.2989  | 838.5155  |
| Y   | 591.3623  | 725.4314  |
| S   | 678.3943  | 562.3681  |
| L   | 791.4784  | 475.3360  |
| A   | 862.5155  | 362.2520  |
| K I | 1134.7125 | 291.2149  |

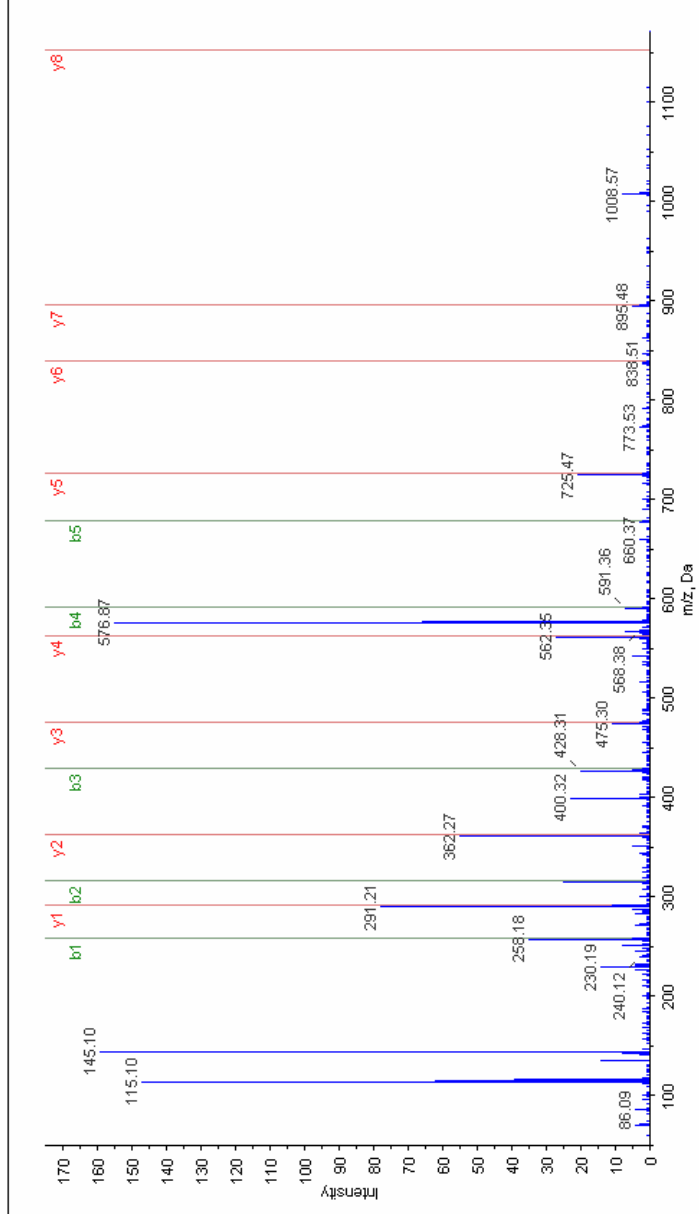

# Protein: SCO2585, ProA [1 of 3]

Protein Quant

Protein ID

Spectra

Summary Statistics

## Spectrum List

| Spectrum      | Time   | Prec MW   | Prec m/z | Prec z | Best Sequence | Modifications | Conf | Theor MW  | z | 115:114 | %Err | 115:114 |
|---------------|--------|-----------|----------|--------|---------------|---------------|------|-----------|---|---------|------|---------|
| 17.1.1.1232.2 | 45.778 | 1621.9125 | 541.6448 | 3      | DYVALDPVGEIVR | ITRAQ@N-term  | 99   | 1621.9160 | 3 |         |      | 116     |

## Peptide ID Hypotheses

| Conf | Sc | Prot N | Sequence        | Modifications              | Theor MW  | Theor m/z | z | ΔMass   |
|------|----|--------|-----------------|----------------------------|-----------|-----------|---|---------|
| 99   | 13 | 852    | DYVALDPVGEIVR   | ITRAQ@N-term               | 1621.9160 | 541.6459  | 3 | -0.0036 |
| <1   | 6  | 89     | LEGLAASPRTVGRAR | No ITRAQ@N-term            | 1621.9376 | 541.6531  | 3 | -0.0251 |
| <1   | 7  |        | ADLSQIVKAYDVR   | No ITRAQ@N-term, Deamid... | 1621.8797 | 541.6338  | 3 | 0.0328  |
| <1   | 7  |        | ALGRVTFDGNVFLVR | No ITRAQ@N-term            | 1621.9376 | 541.6531  | 3 | -0.0251 |
| <1   | 7  |        | DYADPKAYRR      | ITRAQ@N-term, ITRAQ(K)@... | 1621.9265 | 541.6494  | 3 | -0.0140 |

## Precursor MS Region

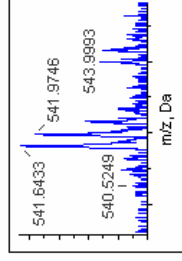

## Fragmentation Evidence for Peptide

ITR | DYVALDPVGEIVR

| Res | b         | y         |
|-----|-----------|-----------|
| D   | 260.1363  | 1622.9234 |
| V   | 359.2047  | 1363.7944 |
| V   | 458.2731  | 1264.7260 |
| A   | 529.3102  | 1165.6575 |
| L   | 642.3943  | 1094.6204 |
| P   | 739.4471  | 981.5364  |
| D   | 854.4740  | 884.4836  |
| P   | 951.5288  | 769.4567  |
| V   | 1050.5952 | 672.4039  |
| G   | 1107.6186 | 573.3355  |
| E   | 1236.6592 | 516.3140  |
| I   | 1349.7433 | 387.2714  |
| V   | 1448.8117 | 274.1874  |
| R   | 1604.9128 | 175.1190  |

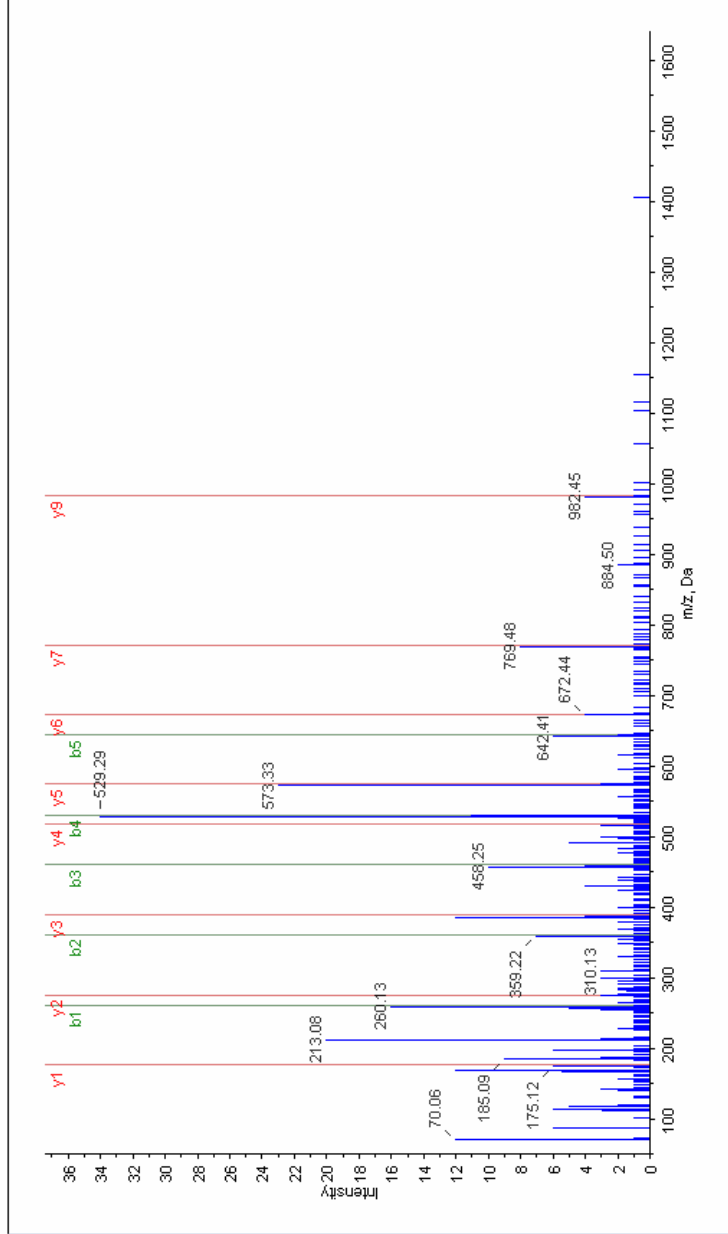



# Protein: SCO2585, ProA [2 of 3]

Protein Quant

Protein ID

Spectra

Summary Statistics

## Spectrum List

| Spectrum      | Time   | Prec MW   | Prec m/z | Prec z | Best Sequence | Modifications | Conf | Theor MW  | z | 115:114 | %Err  | 115:114 |
|---------------|--------|-----------|----------|--------|---------------|---------------|------|-----------|---|---------|-------|---------|
| 19.1.1.1350.3 | 45.734 | 1621.9303 | 811.9724 | 2      | DVVALDPVGEIVR | ITRAQ@N-term  | 99   | 1621.9162 | 2 | 0.9858  | 19.33 | 116     |

## Peptide ID Hypotheses

| Conf | Sc | Prot ID | Sequence         | Modifications              | Theor MW  | Theor m/z | z | ΔMass   |
|------|----|---------|------------------|----------------------------|-----------|-----------|---|---------|
| 99   | 12 | 852     | DVVALDPVGEIVR    | ITRAQ@N-term               | 1621.9162 | 811.9653  | 2 | 0.0141  |
| <1   | 5  | 89      | LEGLAASPGRVYGRAR | No ITRAQ@N-term            | 1621.9377 | 811.9761  | 2 | -0.0074 |
| <1   | 8  |         | DVADPKAYRR       | ITRAQ@N-term, ITRAQ(K)@... | 1621.9266 | 811.9706  | 2 | 0.0037  |
| <1   | 8  |         | LTAVSRRLMRR      | ITRAQ@N-term               | 1621.9723 | 811.9934  | 2 | -0.0420 |
| <1   | 7  |         | ALGRVTPDGNVRLVR  | No ITRAQ@N-term            | 1621.9377 | 811.9761  | 2 | -0.0074 |

## Precursor MS Region

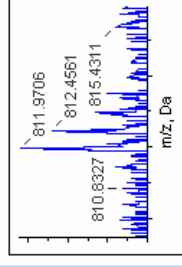

## Fragmentation Evidence for Peptide

ITR | DVVALDPVGEIVR

| Res | b         | y         |
|-----|-----------|-----------|
| D   | 260.1363  | 1622.9234 |
| V   | 359.2047  | 1363.7944 |
| V   | 458.2731  | 1264.7260 |
| A   | 529.3102  | 1165.6575 |
| L   | 642.3943  | 1094.6204 |
| P   | 739.4471  | 981.5364  |
| D   | 854.4740  | 884.4836  |
| P   | 951.5288  | 769.4667  |
| V   | 1050.5952 | 672.4039  |
| G   | 1107.6166 | 573.3355  |
| E   | 1236.6592 | 516.3140  |
| I   | 1349.7433 | 387.2714  |
| V   | 1448.8117 | 274.1874  |
| R   | 1604.9128 | 175.1190  |

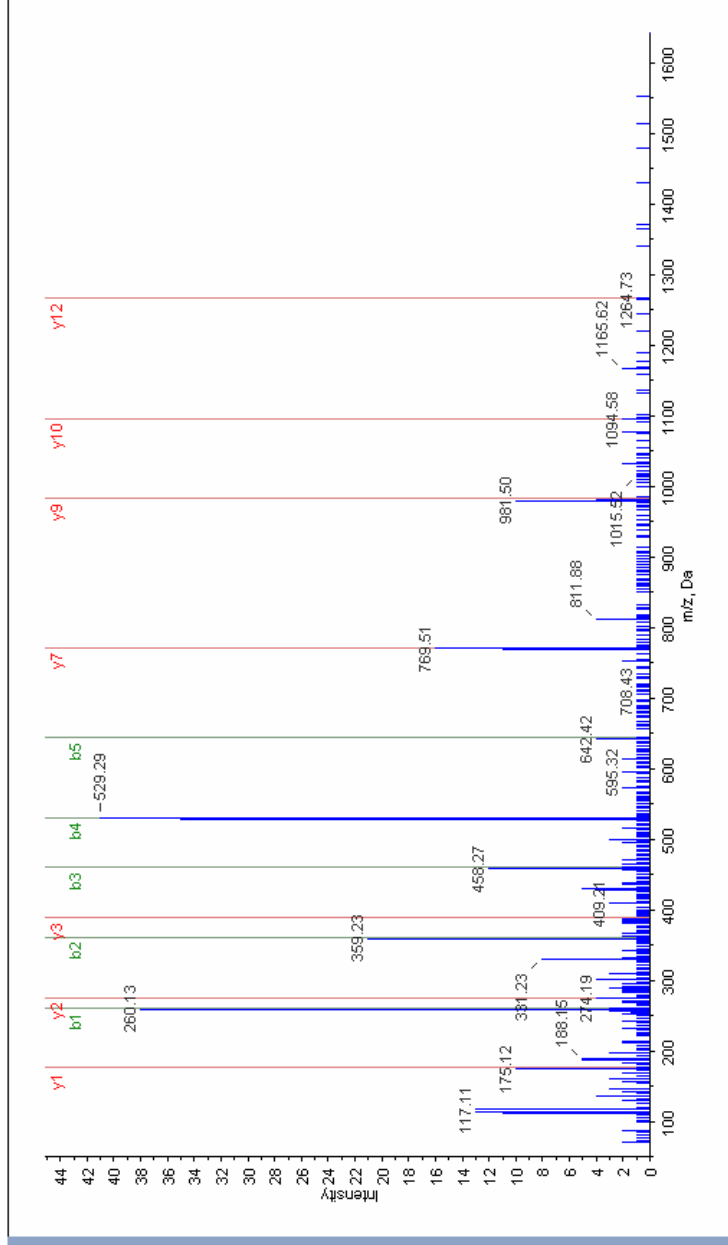

# Protein: SCO2585, ProA [3 of 3]

Protein Quant

Protein ID

Spectra

Summary Statistics

## Spectrum List

| Spectrum      | Time   | Prec MW   | Prec m/z | Prec z | Best Sequence  | Modifications | Conf | Theor MW  | z | 115:114 | %Err | 115:114 |
|---------------|--------|-----------|----------|--------|----------------|---------------|------|-----------|---|---------|------|---------|
| 15.1.1.1115.4 | 45.602 | 1621.9208 | 541.6475 | 3      | DVVALPDPVGEIVR | ITRAQ@N-term  | 99   | 1621.9162 | 3 |         |      | 116     |

## Peptide ID Hypotheses

| Conf | Sc | Prot N | Sequence        | Modifications                | Theor MW  | Theor m/z | z | ΔMass   |
|------|----|--------|-----------------|------------------------------|-----------|-----------|---|---------|
| 99   | 13 | 852    | DVVALPDPVGEIVR  | ITRAQ@N-term                 | 1621.9162 | 541.6460  | 3 | 0.0046  |
| <1   | 6  | 89     | LEGLAASPRTVGRAR | No ITRAQ@N-term              | 1621.9377 | 541.8532  | 3 | -0.0169 |
| <1   | 8  |        | LEQLAEHDPVYR    | ITRAQ@N-term, Oxidation(H... | 1621.8659 | 541.6292  | 3 | 0.0549  |
| <1   | 7  |        | DVADPEAYRR      | ITRAQ@N-term, ITRAQ(K)@...   | 1621.9266 | 541.6495  | 3 | -0.0059 |
| <1   | 6  |        | ALGRVTPDGVFLVR  | No ITRAQ@N-term              | 1621.9377 | 541.8532  | 3 | -0.0169 |

## Precursor MS Region

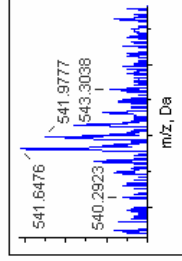

## Fragmentation Evidence for Peptide

ITR | DVVALPDPVGEIVR

| Res | b         | y         |
|-----|-----------|-----------|
| D   | 260.1363  | 1622.9234 |
| V   | 359.2047  | 1363.7944 |
| V   | 458.2731  | 1264.7260 |
| A   | 529.3102  | 1165.6575 |
| L   | 642.3943  | 1094.6204 |
| P   | 739.4471  | 981.5364  |
| D   | 854.4740  | 884.4836  |
| P   | 951.5268  | 769.4567  |
| V   | 1050.5952 | 672.4039  |
| G   | 1107.6166 | 573.3355  |
| E   | 1236.6592 | 516.3140  |
| I   | 1349.7433 | 387.2714  |
| V   | 1448.8117 | 274.1874  |
| R   | 1604.9128 | 175.1190  |

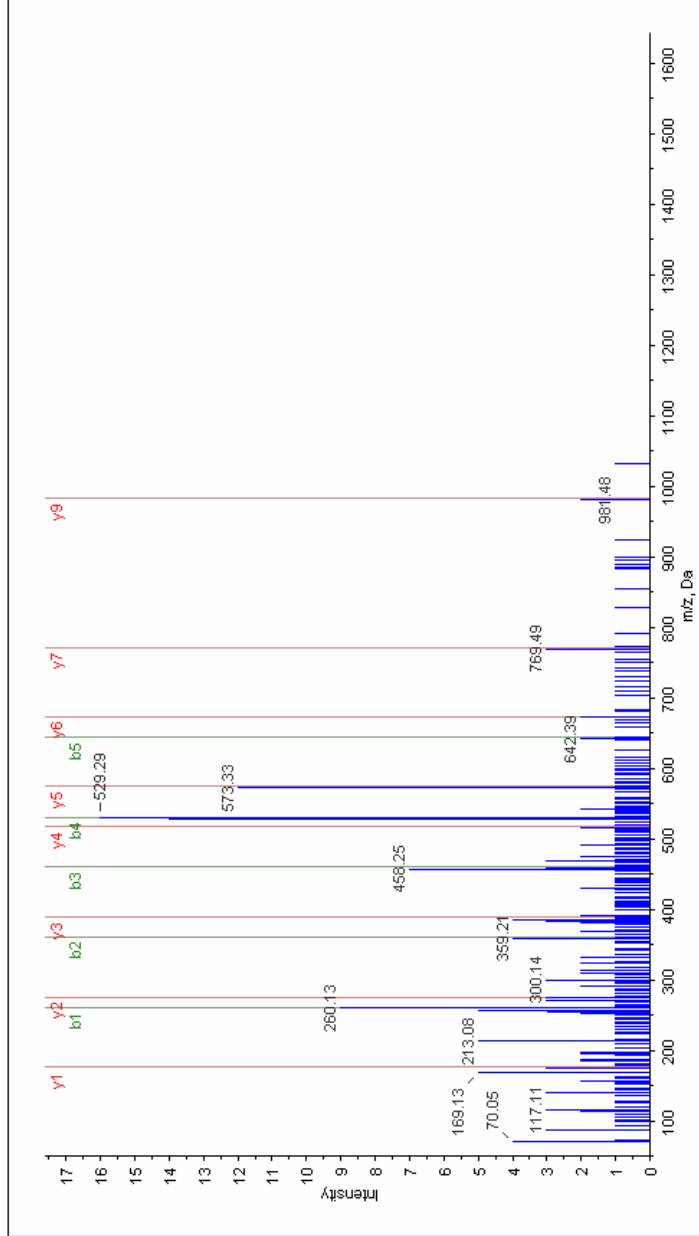

Protein: SCO2633, SodF [1 of 2]

Protein Quant

Protein ID

Spectra

Summary Statistics

Spectrum List

| Spectrum      | z | Time   | Prec MW   | Prec m/z | Prec z | Best Sequence | Modifications              | Conf | Theor MW  | z | 115:114 | %Err 115:114 | 116 |
|---------------|---|--------|-----------|----------|--------|---------------|----------------------------|------|-----------|---|---------|--------------|-----|
| 59.1.1.2408.3 | 2 | 44.607 | 1909.0337 | 955.5241 | 2      | DKETWGSINGLEK | ITRAQ@N-term, ITRAQ(K)@... | 99   | 1909.0159 | 2 | 1.1520  | 1.93         | 116 |

Peptide ID Hypotheses

| Conf | Sc | Prot ID | Sequence          | Modifications              | Theor MW  | Theor m/z | z | ΔMass   |
|------|----|---------|-------------------|----------------------------|-----------|-----------|---|---------|
| 99   | 20 | 472     | DKETWGSINGLEK     | ITRAQ@N-term, ITRAQ(K)@... | 1909.0159 | 955.5152  | 2 | 0.0178  |
| <1   | 17 | 226     | EKESWGSINGLEK     | ITRAQ@N-term, ITRAQ(K)@... | 1909.0159 | 955.5152  | 2 | 0.0178  |
| <1   | 12 |         | LRMTHYPEATSLSGRK  | No ITRAQ@N-term, ITRAQ(... | 1909.0616 | 955.5380  | 2 | -0.0279 |
| <1   | 10 |         | ADDLTDASKDGLEK    | ITRAQ@N-term, ITRAQ(K)@... | 1909.0006 | 955.5076  | 2 | 0.0331  |
| <1   | 9  |         | ATASNVEIAYTPINSAR | ITRAQ@N-term               | 1908.9663 | 955.4904  | 2 | 0.0674  |

Precursor MS Region

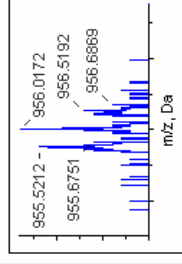

Fragmentation Evidence for Peptide

ITR DK(ITR)ETWGSIN[Dea]GLEK(ITR)

| Residue | b         | y         |
|---------|-----------|-----------|
| D       | 260.1363  | 1910.0231 |
| K[ITR]  | 532.3333  | 1650.8941 |
| E       | 661.3759  | 1378.6971 |
| T       | 762.4236  | 1249.6545 |
| W       | 948.5029  | 1148.6068 |
| G       | 1005.5244 | 962.5275  |
| S       | 1092.5564 | 905.5060  |
| I       | 1205.6404 | 818.4740  |
| N[Dea]  | 1320.6674 | 705.3899  |
| G       | 1377.6889 | 590.3630  |
| L       | 1490.7729 | 533.3415  |
| E       | 1619.8155 | 420.2575  |
| K[ITR]  | 1892.0125 | 291.2149  |

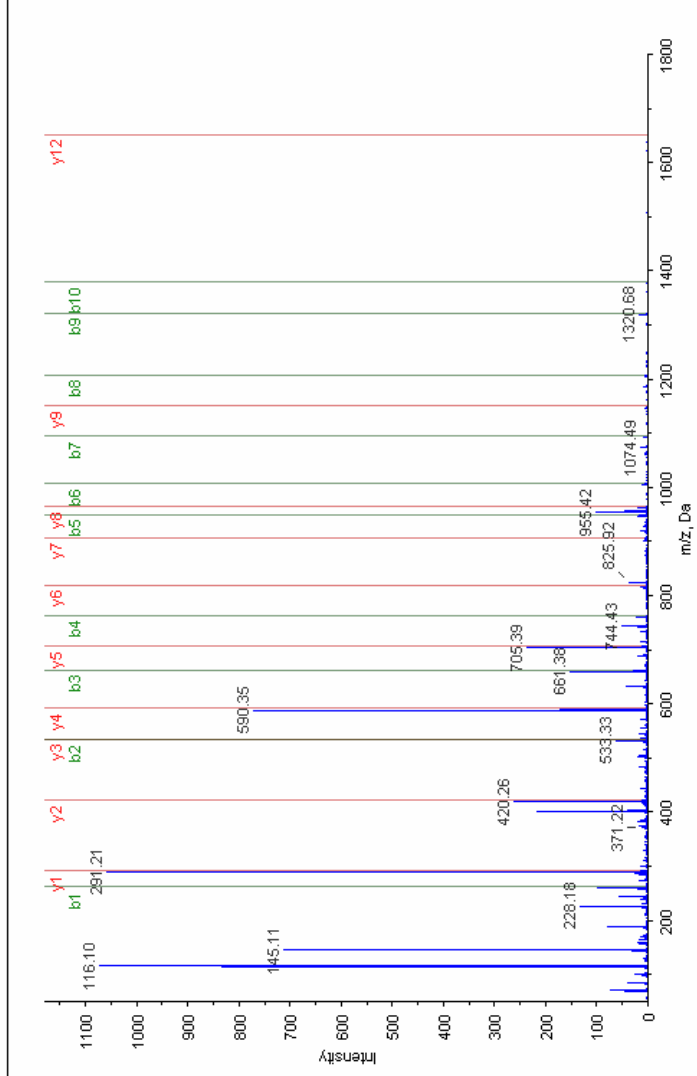

# Protein: SCO2633, SodF [2 of 2]

Protein Quant

Protein ID

Spectra

Summary Statistics

## Spectrum List

| Spectrum      | Time   | Prec MW   | Prec m/z | Prec z | Best Sequence | Modifications              | Conf | Theor MW  | z | 115:114 | %Err | 115:114 |
|---------------|--------|-----------|----------|--------|---------------|----------------------------|------|-----------|---|---------|------|---------|
| 68.1.1.2309.2 | 44.885 | 1908.9866 | 637.3395 | 3      | DKETWGSINGLEK | ITRAQ@N-term, ITRAQ(K)@... | 98   | 1908.0318 | 3 | 0.9605  | 2.59 | 116     |

## Peptide ID Hypotheses

| Conf | Sc | Prot N | Sequence        | z | Modifications               | Theor MW  | Theor m/z | z | ΔMass   |
|------|----|--------|-----------------|---|-----------------------------|-----------|-----------|---|---------|
| 98   | 14 | 472    | DKETWGSINGLEK   | 3 | ITRAQ@N-term, ITRAQ(K)@...  | 1908.0318 | 637.0179  | 3 | 0.9650  |
| <1   | 11 | 226    | EKESWGSINGLEK   | 3 | ITRAQ@N-term, ITRAQ(K)@...  | 1909.0159 | 637.3459  | 3 | -0.0190 |
| <1   | 8  |        | ADDLTDASKDGLK   | 3 | ITRAQ@N-term, ITRAQ(K)@...  | 1909.0006 | 637.3408  | 3 | -0.0038 |
| <1   | 8  |        | ATQEVSPCLVTLASR | 3 | ITRAQ@N-term, Deamidatio... | 1908.9407 | 637.3208  | 3 | 0.0561  |
| <1   | 8  |        | GTDCVVALVEHGRAR | 3 | ITRAQ@N-term, MMIS(C)@4     | 1908.9533 | 637.3250  | 3 | 0.0435  |

## Precursor MS Region

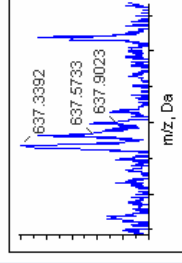

## Fragmentation Evidence for Peptide

ITR [K]ITRETWGSINGLEK[ITR]

| Residue | b         | y         |
|---------|-----------|-----------|
| D       | 260.1363  | 1909.0391 |
| K[ITR]  | 532.3333  | 1649.9101 |
| E       | 661.3759  | 1377.7131 |
| T       | 762.4236  | 1248.6705 |
| W       | 948.5029  | 1147.6228 |
| G       | 1005.5244 | 961.5435  |
| S       | 1092.5564 | 904.5220  |
| I       | 1205.6404 | 817.4900  |
| N       | 1319.6634 | 704.4059  |
| G       | 1376.7048 | 590.3630  |
| L       | 1489.7889 | 533.3415  |
| E       | 1618.8315 | 420.2575  |
| K[ITR]  | 1891.0285 | 291.2149  |

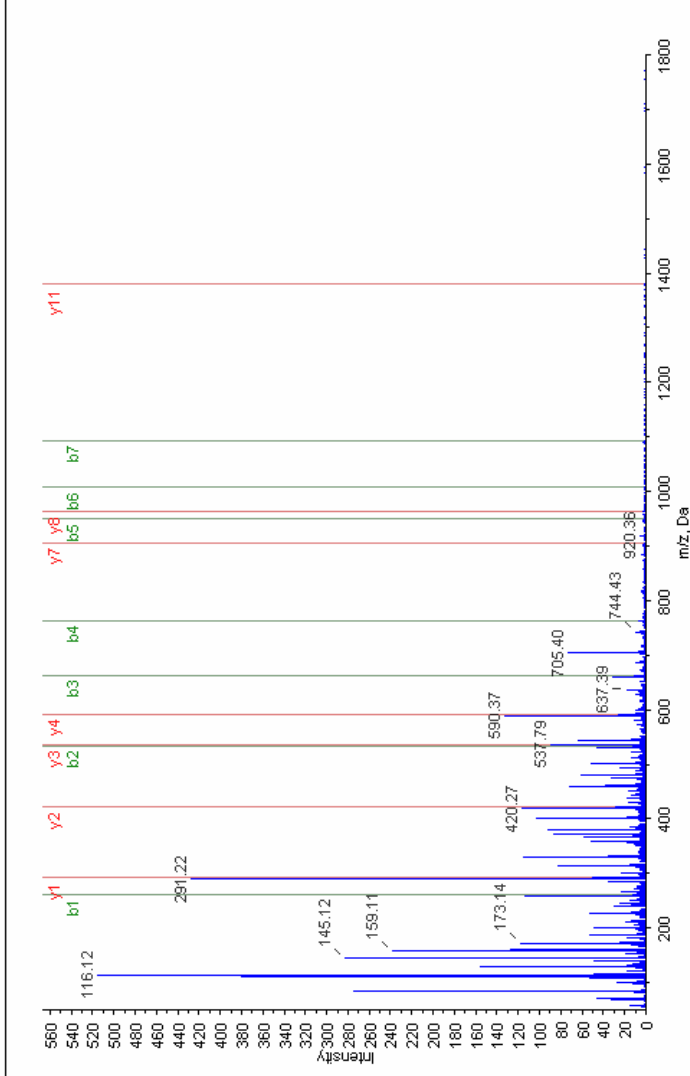

# Protein: SCO3073, HutU [1 of 1]

Protein Quant

Protein ID

Spectra

Summary Statistics

## Spectrum List

| Spectrum     | Time   | Prec MW   | Prec m/z | Prec z | Best Sequence   | Modifications | Conf | Theor MW  | z | 115:114 | %Err  | 115:114 |
|--------------|--------|-----------|----------|--------|-----------------|---------------|------|-----------|---|---------|-------|---------|
| 32.1.1.994.3 | 38.553 | 1753.9083 | 585.6434 | 3      | ADSLDHALQLATEAR | ITRAQ@N-term  | 99   | 1753.9080 | 3 | 0.6102  | 15.78 | 116     |

## Peptide ID Hypotheses

| Conf | Sc | Prot N | Sequence           | Modifications               | Theor MW  | Theor m/z | z | ΔMass   |
|------|----|--------|--------------------|-----------------------------|-----------|-----------|---|---------|
| 99   | 17 | 950    | ADSLDHALQLATEAR    | ITRAQ@N-term                | 1753.9080 | 585.6433  | 3 | 0.0003  |
| <1   | 9  |        | GAALAAGLSAQLAREEAR | No ITRAQ@N-term             | 1753.9435 | 585.6551  | 3 | -0.0352 |
| <1   | 8  |        | DWPGAVLAERLDVSR    | No ITRAQ@N-term             | 1753.9111 | 585.6443  | 3 | -0.0028 |
| <1   | 8  |        | LNGLGNIRALMAAVSDR  | No ITRAQ@N-term, Desamid... | 1753.9435 | 585.6551  | 3 | -0.0352 |
| <1   | 8  |        | LPFWSDSAAGLDRLTR   | No ITRAQ@N-term             | 1753.9111 | 585.6443  | 3 | -0.0028 |

## Precursor MS Region

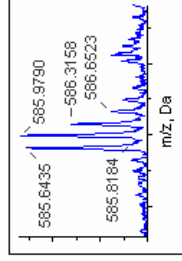

## Fragmentation Evidence for Peptide

ITR | ADSLDHALQLATEAR

| Res | b         | y         |
|-----|-----------|-----------|
| A   | 216.1465  | 1754.9153 |
| D   | 331.1734  | 1538.7752 |
| S   | 418.2054  | 1424.7492 |
| L   | 531.2895  | 1337.7172 |
| D   | 646.3164  | 1224.6331 |
| H   | 783.3753  | 1109.6062 |
| A   | 854.4125  | 972.5473  |
| L   | 967.4965  | 901.5102  |
| Q   | 1095.5551 | 788.4251  |
| L   | 1208.6392 | 660.3675  |
| A   | 1279.6783 | 547.2835  |
| T   | 1380.7240 | 476.2463  |
| E   | 1509.7665 | 375.1987  |
| A   | 1580.8037 | 246.1561  |
| R   | 1736.9048 | 175.1190  |

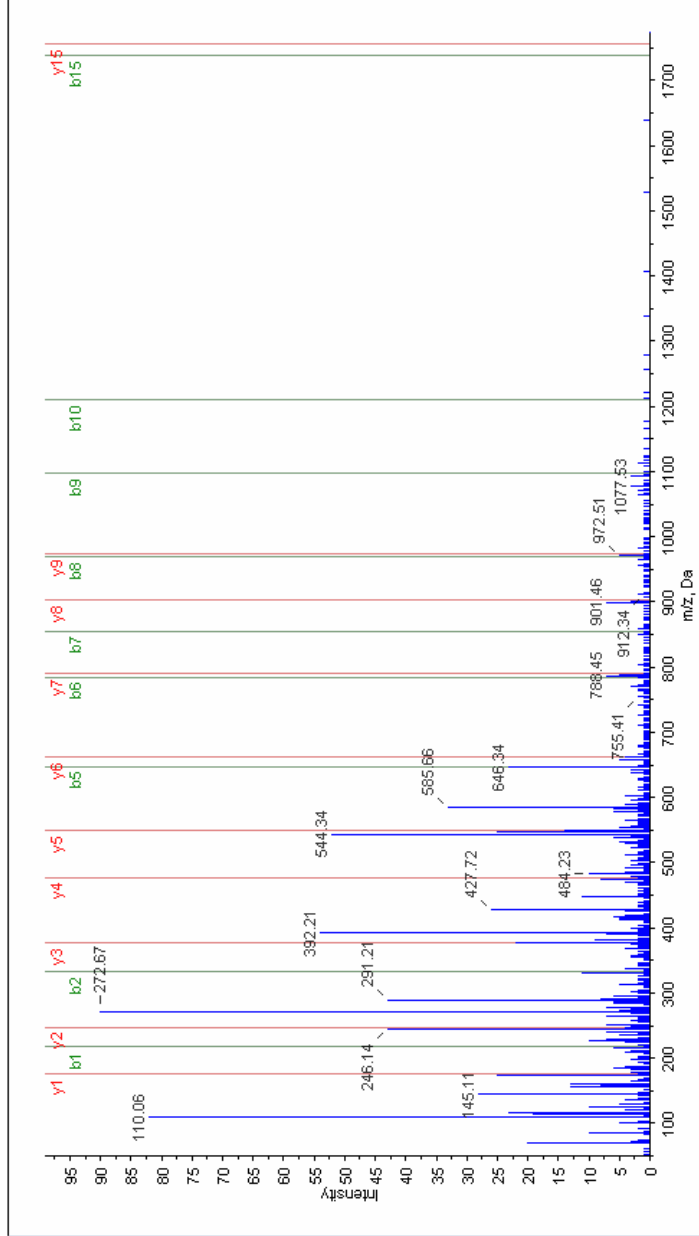

# Protein: SC03077 [1 of 2]

Protein Quant

Protein ID

Spectra

Summary Statistics

## Spectrum List

| Spectrum      | Time   | Prec MW   | Prec m/z | Prec z | Best Sequence | Modifications            | Conf | Theor MW  | z | 115:114 | %Err 115:114 | 116 |
|---------------|--------|-----------|----------|--------|---------------|--------------------------|------|-----------|---|---------|--------------|-----|
| 25.1.1.1063.4 | 47.763 | 1306.7749 | 654.3947 | 2      | ELLDALFAK     | ITRAQ@N-term, ITRAQ(K)@9 | 99   | 1306.7740 | 2 | 1.0626  | 8.83         |     |

## Peptide ID Hypotheses

| Conf | Sc | Prot ID | Sequence    | Modifications               | Theor MW  | Theor m/z | z | ΔMass   |
|------|----|---------|-------------|-----------------------------|-----------|-----------|---|---------|
| 99   | 14 | 611     | ELLDALFAK   | ITRAQ@N-term, ITRAQ(K)@9    | 1306.7740 | 654.3943  | 2 | 0.0009  |
| <1   | 9  |         | AGYSRALFAK  | ITRAQ@N-term, ITRAQ(K)@...  | 1306.7965 | 654.4055  | 2 | -0.0216 |
| <1   | 7  |         | AGPHTAELIVR | ITRAQ@N-term                | 1306.7479 | 654.3812  | 2 | 0.0270  |
| <1   | 6  |         | LSVIYPTMVR  | No ITRAQ@N-term, Deamid...  | 1306.7285 | 654.3715  | 2 | 0.0464  |
| <1   | 6  |         | QLPHLRGWR   | ITRAQ@N-term, Deamidatio... | 1306.7380 | 654.3763  | 2 | 0.0369  |

## Precursor MS Region

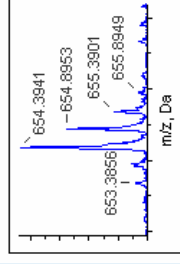

## Fragmentation Evidence for Peptide

ITR ELLDALFAK(ITR)

| Res | b         | y         |
|-----|-----------|-----------|
| E   | 274.1519  | 1307.7813 |
| L   | 387.2360  | 1034.6366 |
| L   | 500.3201  | 921.5526  |
| D   | 615.3470  | 808.4685  |
| A   | 686.3841  | 693.4416  |
| L   | 799.4682  | 622.4045  |
| F   | 946.5366  | 509.3204  |
| A   | 1017.5737 | 362.2520  |
| KI  | 1289.7707 | 291.2149  |

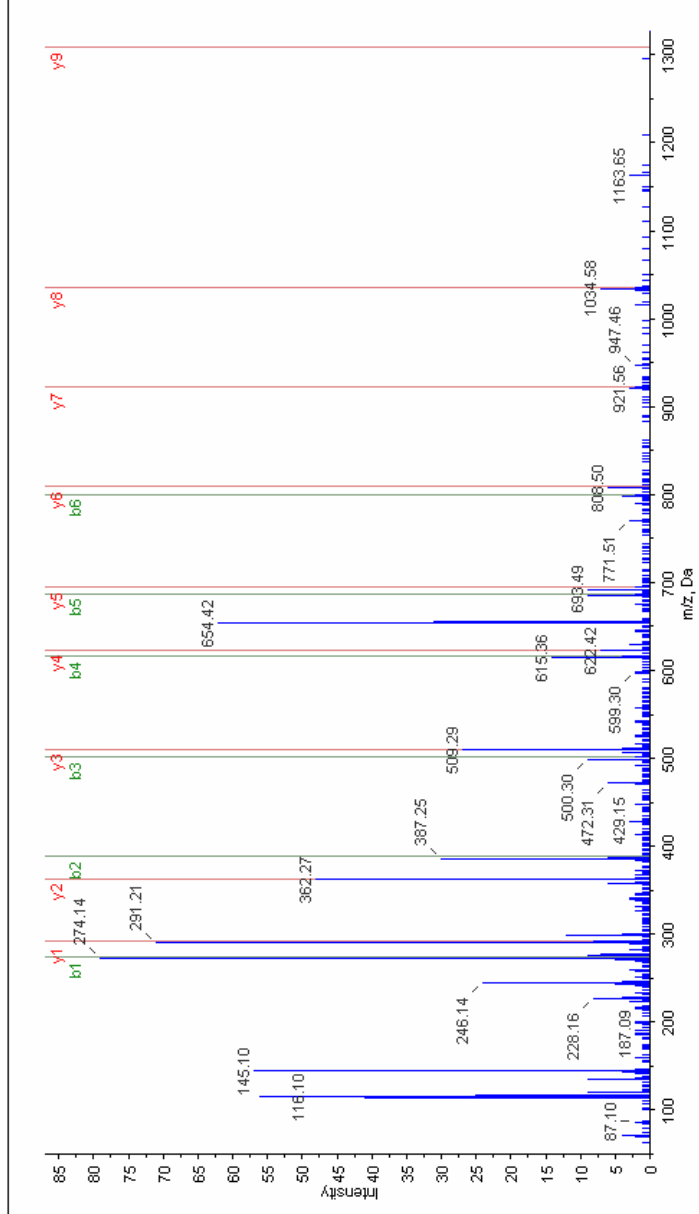

# Protein: SC03077 [2 of 2]

Protein Quant

Protein ID

Spectra

Summary Statistics

## Spectrum List

| Spectrum      | Time   | Prec MW   | Prec m/z | Prec z | Best Sequence | Modifications            | Conf | Theor MW  | z | 115:114 | %Err | 115:114 |
|---------------|--------|-----------|----------|--------|---------------|--------------------------|------|-----------|---|---------|------|---------|
| 26.1.1.1054.4 | 48.154 | 1306.7770 | 654.3957 | 2      | ELLDALFAK     | ITRAQ@N-term, ITRAQ(K)@9 | 99   | 1306.7741 | 2 | 1.2922  | 7.59 | 116:    |

## Peptide ID Hypotheses

| Conf | Sc | Prot N | Sequence     | Modifications               | Theor MW  | Theor m/z | z | ΔMass   |
|------|----|--------|--------------|-----------------------------|-----------|-----------|---|---------|
| 99   | 14 | 611    | ELLDALFAK    | ITRAQ@N-term, ITRAQ(K)@9    | 1306.7741 | 654.3943  | 2 | 0.0029  |
| <1   | 10 |        | AGYSRALFAK   | ITRAQ@N-term, ITRAQ(K)@...  | 1306.7966 | 654.4055  | 2 | -0.0196 |
| <1   | 9  |        | AGPHTAELLYR  | ITRAQ@N-term                | 1306.7480 | 654.3812  | 2 | 0.0290  |
| <1   | 6  |        | QLPHLRGWR    | ITRAQ@N-term, Deamidatio... | 1306.7381 | 654.3763  | 2 | 0.0389  |
| <1   | 6  |        | QRLETARALVYR | PGA of Q@N-term             | 1306.7834 | 654.3990  | 2 | -0.0064 |

## Precursor MS Region

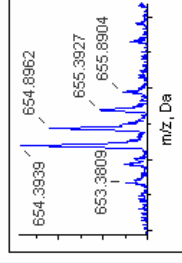

## Fragmentation Evidence for Peptide

ITR ELLDALFAK(ITR)

| Res | b         | y         |
|-----|-----------|-----------|
| E   | 274.1519  | 1307.7813 |
| L   | 387.2360  | 1034.6366 |
| L   | 500.3201  | 921.5526  |
| D   | 615.3470  | 808.4685  |
| A   | 686.3841  | 693.4416  |
| L   | 799.4682  | 622.4045  |
| F   | 946.5366  | 509.3204  |
| A   | 1017.5737 | 362.2520  |
| K I | 1289.7707 | 291.2149  |

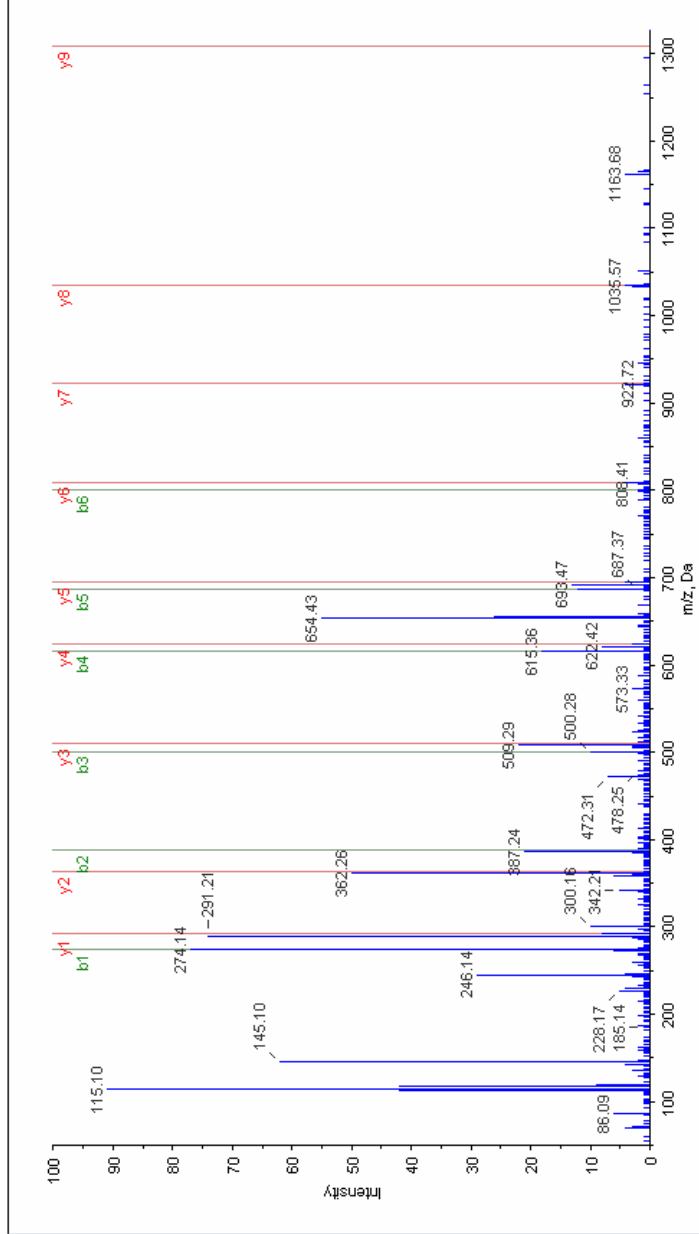

# Protein: SC03405, HprT [ 1 of 1 ]

Protein Quant

Protein ID

Spectra

Summary Statistics

## Spectrum List

| Spectrum      | Time   | Prec MW   | Prec m/z | Prec z | Best Sequence   | Modifications | Conf | Theor MW  | z | 115:114 | %Err 115:114 | 116 |
|---------------|--------|-----------|----------|--------|-----------------|---------------|------|-----------|---|---------|--------------|-----|
| 19.1.1.1353.2 | 46.374 | 1684.9115 | 843.4630 | 2      | NLPFVGTLLAPHYGG | ITRAG@N-term  | 99   | 1684.9060 | 2 | 0.7095  | 6.42         | 116 |

## Peptide ID Hypotheses

| Conf | Sc | Prot ID | Sequence                  | Modifications               | Theor MW  | Theor m/z | z | ΔMass   |
|------|----|---------|---------------------------|-----------------------------|-----------|-----------|---|---------|
| 99   | 15 | 783     | NLPFVGTLLAPHYGG           | ITRAG@N-term                | 1684.9060 | 843.4603  | 2 | 0.0055  |
| <1   | 7  | 25      | AIAVGEVSNLAR <sup>R</sup> | ITRAG@N-term, Deamidatio... | 1684.9343 | 843.4744  | 2 | -0.0228 |
| <1   | 7  |         | EDLLEDAGYDFAGLK           | No ITRAG@N-term, ITRAG@(... | 1684.8642 | 843.4394  | 2 | 0.0473  |
| <1   | 7  |         | MTLDLPELPFFLR             | ITRAG@N-term                | 1684.9345 | 843.4745  | 2 | -0.0230 |
| <1   | 6  |         | TPRVEEARIVPR              | ITRAG@N-term                | 1684.9165 | 843.4655  | 2 | -0.0050 |

## Precursor MS Region

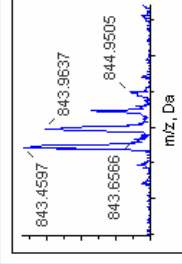

## Fragmentation Evidence for Peptide

ITR |NLPFVGTLLAPHYGG

| Res | b         | y         |
|-----|-----------|-----------|
| N   | 259.1523  | 1685.9132 |
| L   | 372.2363  | 1427.7682 |
| P   | 469.2891  | 1314.6841 |
| F   | 616.3575  | 1217.6313 |
| V   | 715.4259  | 1070.5829 |
| G   | 772.4474  | 971.4945  |
| T   | 873.4951  | 914.4730  |
| L   | 986.5791  | 813.4254  |
| A   | 1057.6162 | 700.3413  |
| P   | 1154.6690 | 629.3042  |
| H   | 1291.7279 | 532.2514  |
| V   | 1390.7963 | 395.1925  |
| Y   | 1553.8597 | 296.1241  |
| G   | 1610.8811 | 133.0608  |
| G   | 1687.9026 | 76.0393   |

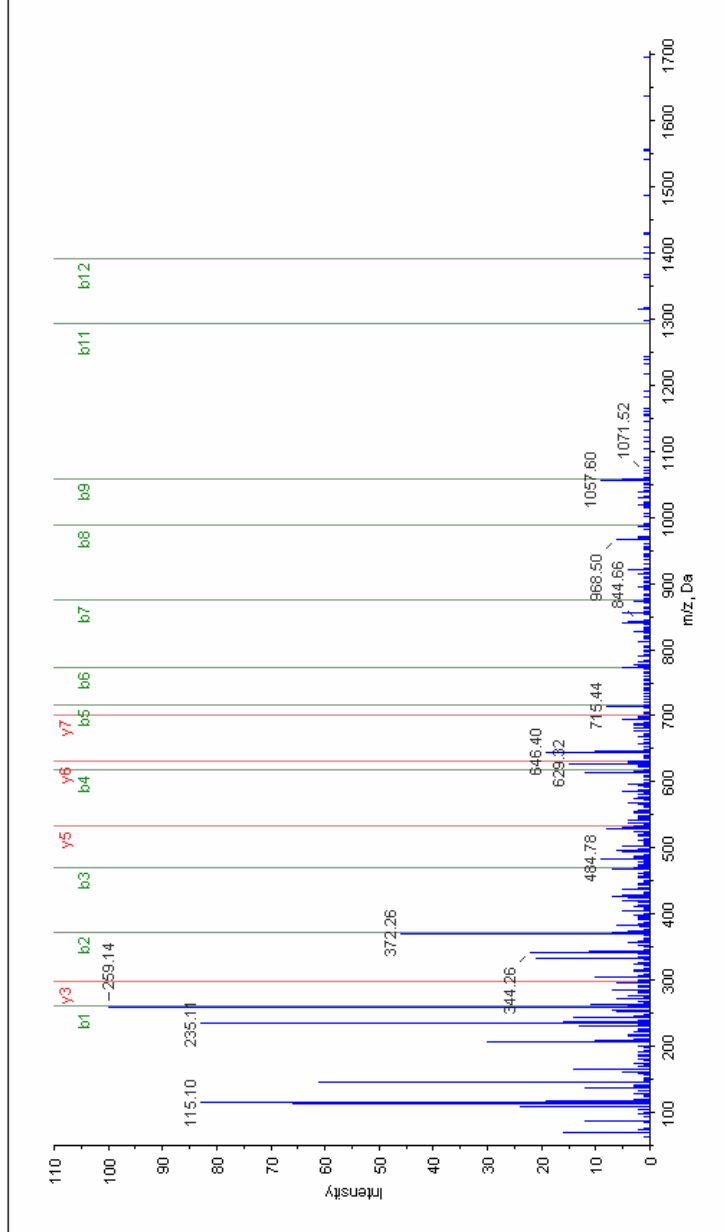



# Protein: SC03830, BkdB2 [1 of 2]

Protein Quant

Protein ID

Spectra

Summary Statistics

## Spectrum List

| Spectrum      | Time   | Prec MW | Prec m/z | Prec z | Best Sequence             | Modifications | Conf | Theor MW  | z | 115:114 | %Err | 115:114 |
|---------------|--------|---------|----------|--------|---------------------------|---------------|------|-----------|---|---------|------|---------|
| 36.1.1.2534.2 | 53.420 | 0.0000  | 843.4221 | 0      | DAMAADPGVHVLGEDVGTLLGGVFR | ITRAQ@N-term  | 99   | 2526.2659 | 3 | 1.9243  | 7.02 | 116     |

## Peptide ID Hypotheses

| Conf | Sc | Prot N | Sequence                  | Modifications               | Theor MW  | Theor m/z | z | ΔMass   |
|------|----|--------|---------------------------|-----------------------------|-----------|-----------|---|---------|
| 99   | 15 | 526    | DAMAADPGVHVLGEDVGTLLGGVFR | ITRAQ@N-term                | 2526.2659 | 843.0959  | 3 | 0.9787  |
| <1   | 8  |        | TWIHLLEGAGHAGLI           | ITRAQ@N-term, Deamidatio... | 1684.8576 | 843.4361  | 2 | -0.0279 |
| <1   | 7  |        | AGLPADMQPKTWDEVLDAAR      | ITRAQ@N-term, Deamidatio... | 2527.2952 | 843.4390  | 3 | -0.0505 |
| <1   | 7  |        | ATSPAVAAAR                | No ITRAQ@N-term             | 842.4610  | 843.4683  | 1 | -0.0462 |
| <1   | 7  |        | SLFDITVGMVTQDGHLLFDIVR    | ITRAQ@N-term                | 2527.2724 | 843.4314  | 3 | -0.0278 |

## Precursor MS Region

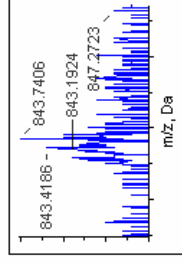

## Fragmentation Evidence for Peptide

ITR | DAMAADPGVHVLGEDVGTLLGGVFR

| Residue | b         | y         |
|---------|-----------|-----------|
| D       | 260.1363  | 2527.2731 |
| A       | 391.1734  | 2266.1441 |
| M       | 482.2139  | 2197.1070 |
| A       | 533.2510  | 2066.0665 |
| A       | 604.2881  | 1995.0294 |
| D       | 719.3151  | 1923.9923 |
| P       | 816.3678  | 1808.9654 |
| G       | 873.3893  | 1711.9126 |
| V       | 972.4577  | 1654.8911 |
| H       | 1109.5166 | 1555.8227 |
| V       | 1208.5850 | 1418.7638 |
| L       | 1321.6691 | 1319.6954 |
| G       | 1378.6905 | 1206.6113 |
| E       | 1507.7331 | 1149.5899 |
| D       | 1622.7601 | 1020.5473 |
| V       | 1721.8285 | 905.5203  |
| G       | 1778.8500 | 806.4519  |
| T       | 1879.8976 | 749.4304  |
| L       | 1982.9817 | 648.3828  |
| G       | 2050.0032 | 535.2987  |
| G       | 2107.0246 | 478.2772  |
| V       | 2206.0930 | 421.2558  |
| F       | 2363.1615 | 322.1874  |
| R       | 2509.2626 | 175.1190  |

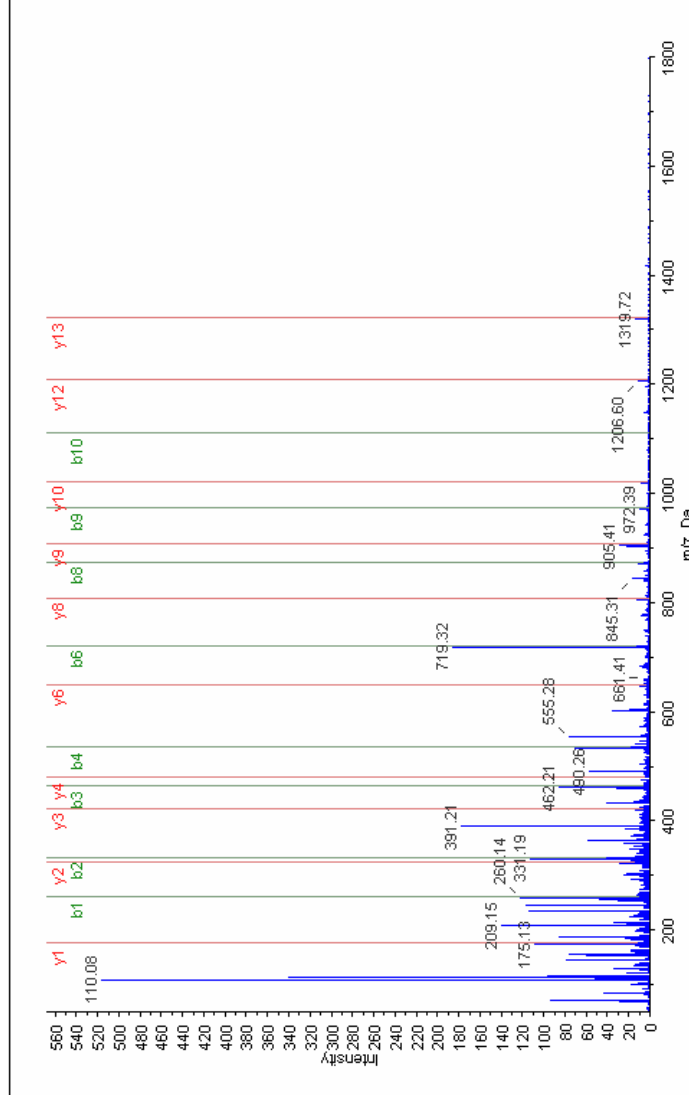

# Protein: SC03830, BkdB2 [2 of 2]

Protein Quant

Protein ID

Spectra

Summary Statistics

## Spectrum List

| Spectrum      | Time   | Prec MW   | Prec m/z | Prec z | Best Sequence               | Modifications                | Conf | Theor MW  | z | 115:114 | %Err 115:114 | 116 |
|---------------|--------|-----------|----------|--------|-----------------------------|------------------------------|------|-----------|---|---------|--------------|-----|
| 36.1.1.2525.3 | 52.364 | 2542.2368 | 848.4202 | 3      | DAMAAD.PGVHVLGEDVY.GTLGGVFR | ITRAQ@N-term, Oxidation(...) | 99   | 2542.2606 | 3 | 1.5356  | 8.33         | 116 |

## Peptide ID Hypotheses

| Conf | Sc | Prot ID | Sequence                                 | Modifications                | Theor MW  | Theor m/z | z | ΔMass   |
|------|----|---------|------------------------------------------|------------------------------|-----------|-----------|---|---------|
| 99   | 18 | 526     | DAMAAD.PGVHVLGEDVY.GTLGGVFR              | ITRAQ@N-term, Oxidation(...) | 2542.2606 | 848.4275  | 3 | -0.0219 |
| <1   | 8  |         | AAWEAARGSAFGRHDDFGADGEGSR                | No ITRAQ@N-term              | 2542.1332 | 848.3850  | 3 | 0.1055  |
| <1   | 8  |         | ATVAGHAATFTGAGRWAE.SREGLAR               | No ITRAQ@N-term              | 2542.2788 | 848.4335  | 3 | -0.0400 |
| <1   | 7  |         | AAVVVYGAAGADLGPADAIDVYVYR                | ITRAQ@N-term, ITRAQ(Y)@...   | 2542.3997 | 848.4738  | 3 | -0.1610 |
| <1   | 7  |         | AFVA.SLASAER.PDR.LGVV.LMD.GRD.SV.SS.GGAR | ITRAQ@N-term                 | 3389.7595 | 848.4472  | 4 | -0.1077 |

## Precursor MS Region

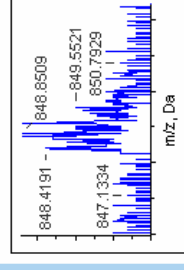

## Fragmentation Evidence for Peptide

ITR | DAM[Oxi]AADPGVHVLGEDVY.GTLGGVFR

| Residue | b         | y         |
|---------|-----------|-----------|
| D       | 260.1363  | 2543.2680 |
| A       | 331.1734  | 2284.1390 |
| M[Oxi]  | 478.2088  | 2213.1019 |
| A       | 549.2459  | 2066.0665 |
| A       | 620.2830  | 1995.0294 |
| D       | 735.3100  | 1923.9923 |
| P       | 832.3627  | 1808.9654 |
| G       | 889.3842  | 1711.9126 |
| V       | 988.4526  | 1654.8911 |
| H       | 1125.5115 | 1555.8227 |
| V       | 1224.5799 | 1418.7638 |
| L       | 1337.6640 | 1319.6954 |
| G       | 1394.6655 | 1206.6113 |
| E       | 1523.7281 | 1149.5899 |
| D       | 1638.7550 | 1020.5473 |
| V       | 1737.8234 | 905.5203  |
| G       | 1794.8449 | 806.4519  |
| T       | 1895.8926 | 749.4304  |
| L       | 2008.9766 | 648.3828  |
| G       | 2065.9981 | 535.2987  |
| G       | 2123.0195 | 478.2772  |
| V       | 2222.0880 | 421.2558  |
| F       | 2369.1564 | 322.1874  |
| R       | 2525.2575 | 175.1190  |

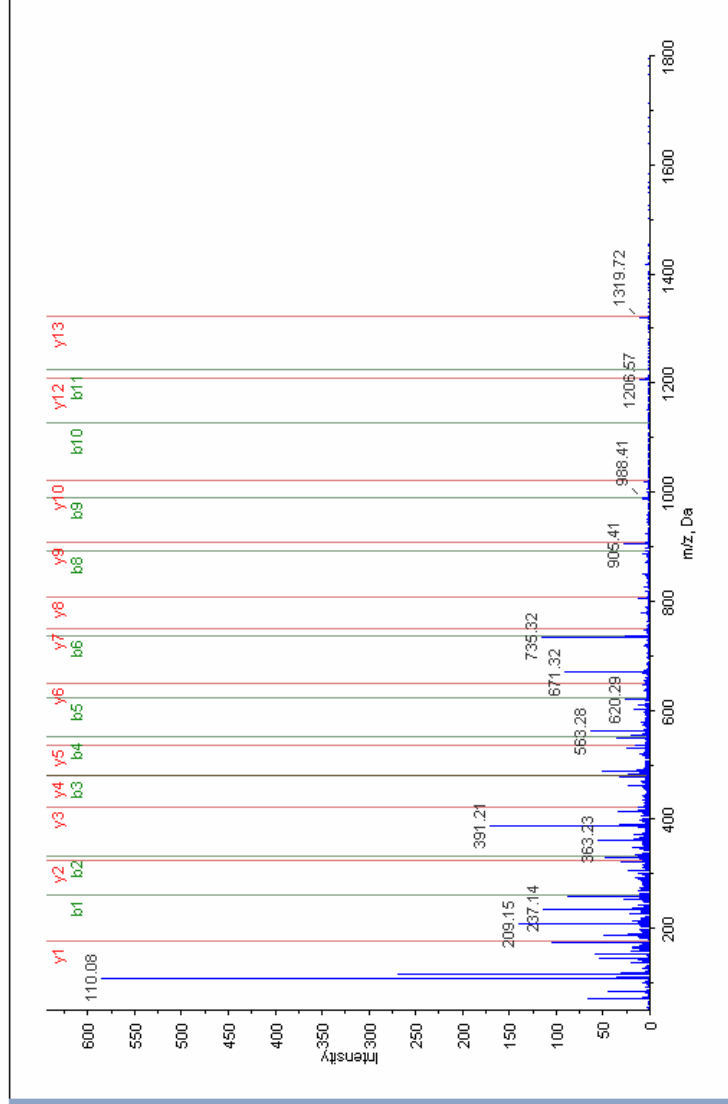

# Protein: SC03920, CysA [1 of 2]

Protein Quant

Protein ID

Spectra

Summary Statistics

## Spectrum List

| Spectrum      | Time   | Prec MW   | Prec m/z | Prec z | Best Sequence      | Modifications | Conf | Theor MW  | z | 115:114 | %Err  | 115:114 |
|---------------|--------|-----------|----------|--------|--------------------|---------------|------|-----------|---|---------|-------|---------|
| 19.1.1.1440.2 | 54.185 | 1941.0204 | 971.5174 | 2      | LSVGAEDPDDL VADLLR | ITRAQ@N-term  | 99   | 1941.0177 | 2 | 1.1602  | 17.19 | 116     |

## Peptide ID Hypotheses

| Conf | Sc | Prot ID | Sequence           | Modifications              | Theor MW  | Theor m/z | z | ΔMass   |
|------|----|---------|--------------------|----------------------------|-----------|-----------|---|---------|
| 99   | 13 | 492     | LSVGAEDPDDL VADLLR | ITRAQ@N-term               | 1941.0177 | 971.5161  | 2 | 0.0027  |
| <1   | 7  |         | VSNIEGTITLSPERLR   | No ITRAQ@N-term, Deamid... | 1941.0644 | 971.5395  | 2 | -0.0440 |
| <1   | 6  |         | LDAGLFFLAYQDRI     | ITRAQ@N-term               | 1941.0595 | 971.5370  | 2 | -0.0391 |
| <1   | 6  |         | LSLRGQGTTRAPGAEAGR | ITRAQ@N-term               | 1941.0627 | 971.5386  | 2 | -0.0423 |
| <1   | 6  |         | NDLGRVTEPGTVRVER   | ITRAQ@N-term               | 1941.0514 | 971.5330  | 2 | -0.0310 |

## Precursor MS Region

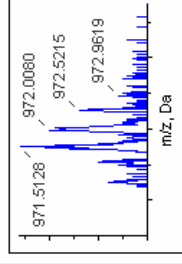

## Fragmentation Evidence for Peptide

ITR LSVGAEDPDDL VADLLR

| Res | b         | y         |
|-----|-----------|-----------|
| L   | 258.1934  | 1942.0249 |
| S   | 345.2254  | 1684.8388 |
| V   | 444.2938  | 1597.8068 |
| G   | 501.3153  | 1498.7384 |
| A   | 572.3524  | 1441.7169 |
| E   | 701.3950  | 1370.6798 |
| D   | 816.4220  | 1241.6372 |
| P   | 913.4747  | 1126.6103 |
| D   | 1028.5017 | 1029.5575 |
| D   | 1143.5286 | 914.5306  |
| L   | 1255.6127 | 799.5036  |
| V   | 1355.6811 | 686.4196  |
| A   | 1426.7182 | 587.3511  |
| D   | 1541.7451 | 516.3140  |
| L   | 1654.8292 | 401.2871  |
| L   | 1767.9133 | 288.2030  |
| R   | 1924.0144 | 175.1190  |

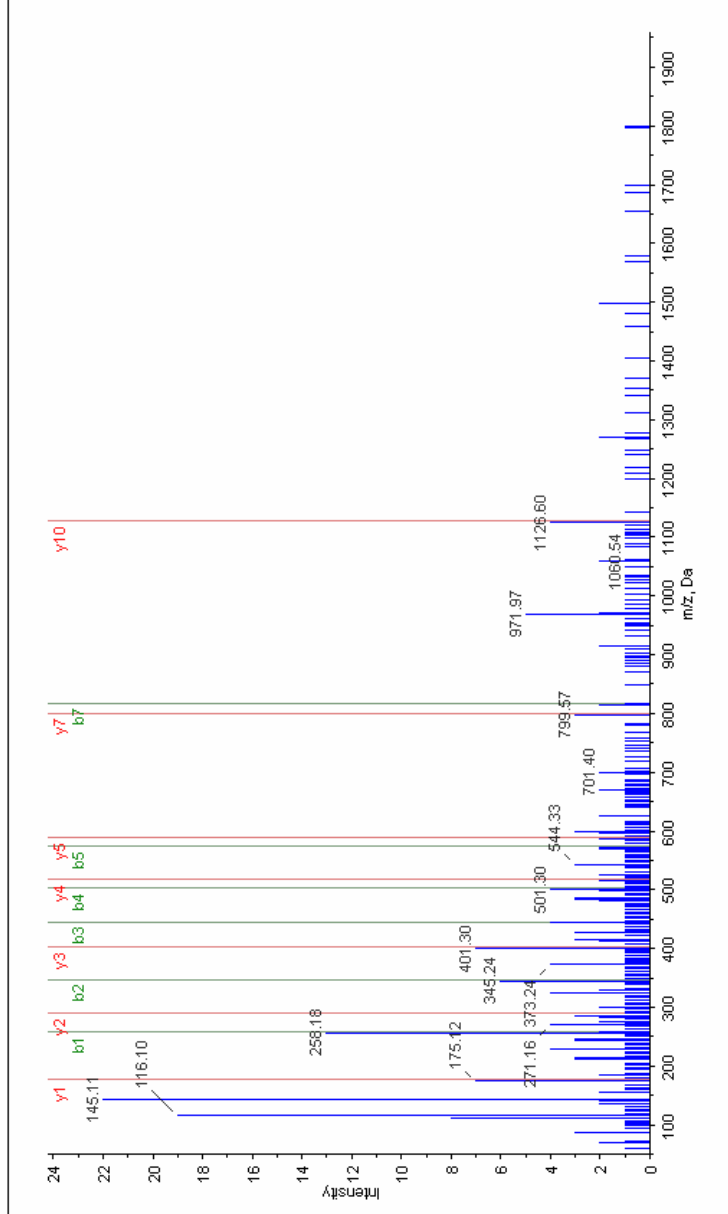

# Protein: SC03920, CysA [2 of 2]

Protein Quant

Protein ID

Spectra

Summary Statistics

## Spectrum List

| Spectrum     | Time   | Prec MW   | Prec m/z | Prec z | Best Sequence    | Modifications | Conf | Theor MW  | z | 115:114 | %Err 115:114 |
|--------------|--------|-----------|----------|--------|------------------|---------------|------|-----------|---|---------|--------------|
| 5.1.1.2134.3 | 48.517 | 1941.0127 | 971.5136 | 2      | LSVGAEDPDDLVDLLR | ITRAG@N-term  | 99   | 1941.0177 | 2 | 0.8533  | 5.95         |

## Peptide ID Hypotheses

| Conf | Sc | Prot N | Sequence          | Modifications           | Theor MW  | Theor m/z | z | ΔMass   |
|------|----|--------|-------------------|-------------------------|-----------|-----------|---|---------|
| 99   | 16 | 390    | LSVGAEDPDDLVDLLR  | ITRAG@N-term            | 1941.0177 | 971.5161  | 2 | -0.0050 |
| <1   | 8  |        | AVLAGGCFWGHEELIR  | ITRAG@N-term, MMTS(C)@7 | 1940.9433 | 971.4789  | 2 | 0.0694  |
| <1   | 8  |        | RLASIDFPVPEALDR   | ITRAG@N-term            | 1941.0605 | 971.5476  | 2 | -0.0679 |
| <1   | 8  |        | VAIAMADAEDALERLAR | ITRAG@N-term            | 1941.0401 | 971.5274  | 2 | -0.0274 |
| <1   | 8  |        | VTAVADAARARLLDR   | ITRAG@N-term            | 1941.0678 | 971.5512  | 2 | -0.0751 |

## Precursor MS Region

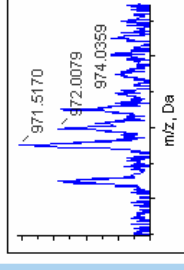

## Fragmentation Evidence for Peptide

ITR LSVGAEPPDDLVDLLR

| Residue | b         | y         |
|---------|-----------|-----------|
| L       | 258.1934  | 1942.0249 |
| S       | 345.2254  | 1684.8388 |
| V       | 444.2938  | 1597.8068 |
| G       | 501.3153  | 1498.7384 |
| A       | 572.3524  | 1441.7169 |
| E       | 701.3950  | 1370.6798 |
| D       | 816.4220  | 1241.6372 |
| P       | 913.4747  | 1126.6103 |
| D       | 1028.5017 | 1029.5575 |
| D       | 1143.5286 | 914.5306  |
| L       | 1256.6127 | 799.5036  |
| V       | 1355.6611 | 686.4196  |
| A       | 1426.7182 | 587.3511  |
| D       | 1541.7451 | 516.3140  |
| L       | 1654.8292 | 491.2871  |
| L       | 1767.9133 | 288.2030  |
| R       | 1924.0144 | 175.1190  |

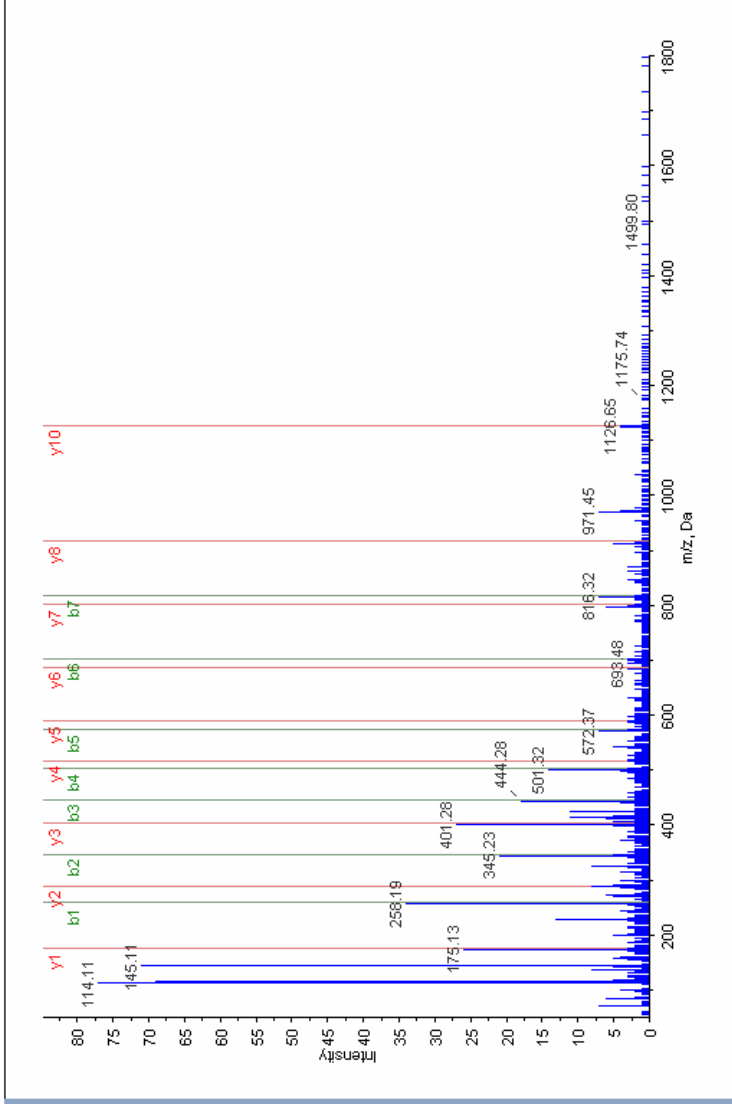

# Protein: SC04594 [1 of 1]

Protein Quant

Protein ID

Spectra

Summary Statistics

## Spectrum List

| Spectrum      | Time   | Prec MW   | Prec m/z | Prec z | Best Sequence    | Modifications | Conf | Theor MW  | z | 115:114 | %Err | 115:114 |
|---------------|--------|-----------|----------|--------|------------------|---------------|------|-----------|---|---------|------|---------|
| 38.1.1.2452.2 | 46.241 | 1898.0402 | 633.6873 | 3      | LADPDTLHHTPIGVLR | iTRAQ@N-term  | 99   | 1898.0496 | 3 | 2.4765  | 3.17 | 116     |

## Peptide ID Hypotheses

| Conf | Sc | Prot ID | Sequence          | Modifications               | Theor MW  | Theor m/z | z | ΔMass   |
|------|----|---------|-------------------|-----------------------------|-----------|-----------|---|---------|
| 99   | 15 | 423     | LADPDTLHHTPIGVLR  | iTRAQ@N-term                | 1898.0496 | 633.6905  | 3 | -0.0095 |
| <1   | 9  |         | MYTPEVDKIAQELVLR  | No iTRAQ@N-term, iTRAQ@C... | 1898.0231 | 633.6816  | 3 | 0.0170  |
| <1   | 8  |         | DTARVLGRMFDGIEVLR | No iTRAQ@N-term             | 1897.9469 | 633.6562  | 3 | 0.0833  |
| <1   | 8  |         | EARSVYWSAGGADMQDR | No iTRAQ@N-term             | 1897.8377 | 633.6199  | 3 | 0.2024  |
| <1   | 7  |         | ALPLDESLSAAEARRR  | iTRAQ@N-term                | 1898.0456 | 633.6692  | 3 | -0.0054 |

## Precursor MS Region

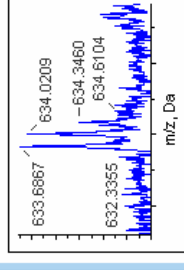

## Fragmentation Evidence for Peptide

iTRAQ LADPDTLHHTPIGVLR

| Residue | b         | y         |
|---------|-----------|-----------|
| L       | 258.1934  | 1899.0569 |
| A       | 329.2305  | 1641.8707 |
| D       | 444.2575  | 1570.8336 |
| P       | 541.3102  | 1485.8067 |
| D       | 656.3372  | 1358.7539 |
| T       | 757.3848  | 1243.7270 |
| L       | 870.4689  | 1142.6793 |
| H       | 1007.5278 | 1029.5952 |
| H       | 1144.5867 | 892.5363  |
| T       | 1245.6344 | 755.4774  |
| P       | 1342.6872 | 654.4297  |
| I       | 1455.7712 | 557.3770  |
| G       | 1512.7927 | 444.2929  |
| V       | 1611.8611 | 387.2714  |
| L       | 1724.9452 | 288.2030  |
| R       | 1881.0463 | 175.1190  |

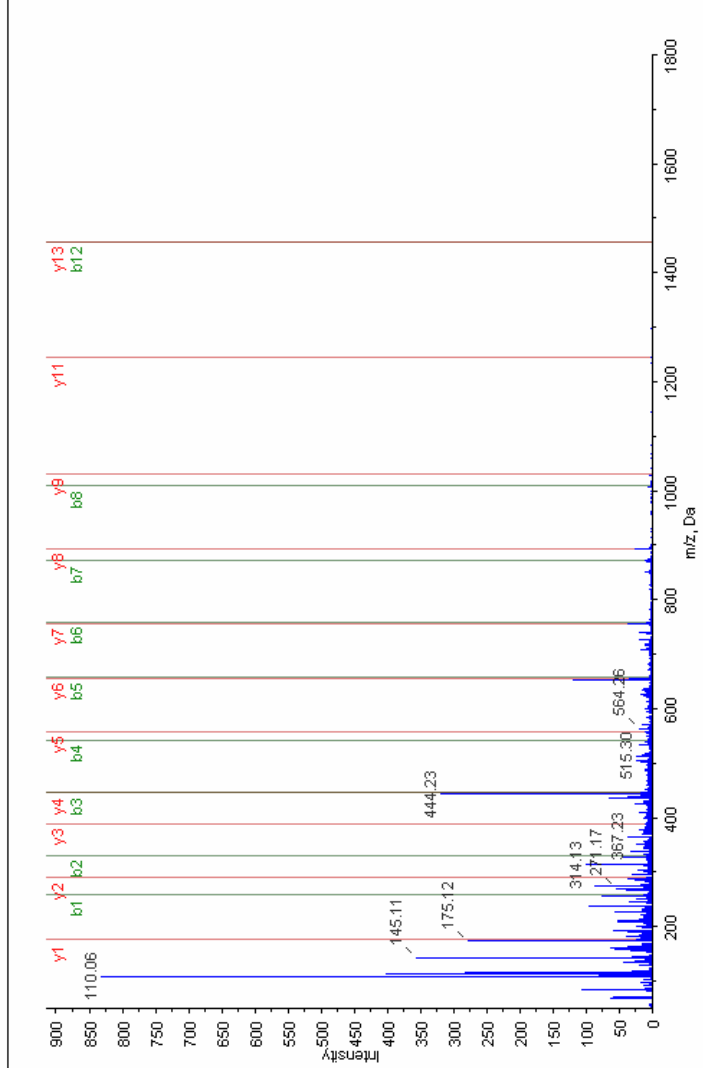

# Protein: SCO4601 [1 of 1]

Protein Quant

Protein ID

Spectra

Summary Statistics

## Spectrum List

| Spectrum    | Time   | Prec MW | Prec m/z | Prec z | Best Sequence                                              | Modifications               | Conf | Theor MW  | z | 115:114 | %Err 115:114 | 116 |
|-------------|--------|---------|----------|--------|------------------------------------------------------------|-----------------------------|------|-----------|---|---------|--------------|-----|
| 16.1.1029.2 | 26.910 | 0.0000  | 968.4505 | 0      | AA GP AD G P T T A D T A A G Q D G T S T G T G A P A T G R | ITRAQ@N-term, Deamidatio... | 99   | 2902.3298 | 3 |         |              |     |

## Peptide ID Hypotheses

| Conf | Sc | Prot ID | Sequence                                                      | Modifications               | Theor MW  | Theor m/z | z | ΔMass   |
|------|----|---------|---------------------------------------------------------------|-----------------------------|-----------|-----------|---|---------|
| 99   | 16 | 613     | AA GP AD G P T T A D T A A G Q D G T S T G T G A P A T G R    | ITRAQ@N-term, Deamidatio... | 2902.3298 | 968.4506  | 3 | -0.0002 |
| <1   | 6  |         | E L D W R E I L K A W C A S M P E D W G Y T P D M M T G P I R | No ITRAQ@N-term, ITRAQ(...  | 3869.7796 | 968.4522  | 4 | -0.0067 |
| <1   | 6  |         | W L V S M D G S P A R T A D G G R                             | ITRAQ@N-term, Oxidation(... | 1934.9391 | 968.4768  | 2 | -0.0526 |
| <1   | 5  |         | A A G F S P E T V L E V E D D G R                             | ITRAQ@N-term                | 1934.9344 | 968.4744  | 2 | -0.0479 |
| <1   | 5  |         | A A P A D T P T C A P                                         | No ITRAQ@N-term             | 967.4811  | 968.4683  | 1 | -0.0178 |

## Precursor MS Region

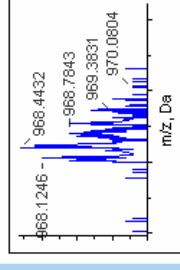

## Fragmentation Evidence for Peptide

ITR AA GP AD G P T T A D T A A G Q D G T S T G T G A P A T G R

| Res | b         | y       |
|-----|-----------|---------|
| A   | 216.1465  | 2903.33 |
| A   | 287.1836  | 2688.19 |
| G   | 344.2050  | 2617.16 |
| P   | 441.2578  | 2560.13 |
| A   | 512.2949  | 2463.08 |
| D   | 627.3219  | 2392.04 |
| G   | 684.3433  | 2277.02 |
| P   | 781.3961  | 2220.00 |
| T   | 882.4438  | 2122.94 |
| T   | 983.4914  | 2021.90 |
| A   | 1054.5285 | 1920.85 |
| D   | 1169.5555 | 1849.81 |
| T   | 1270.6032 | 1734.78 |
| A   | 1341.6403 | 1633.74 |
| A   | 1412.6774 | 1562.70 |
| G   | 1469.6989 | 1491.66 |
| QI  | 1586.7415 | 1434.64 |
| G   | 1655.7629 | 1305.60 |
| D   | 1770.7899 | 1248.58 |
| G   | 1827.8113 | 1133.55 |
| T   | 1928.8590 | 1076.53 |
| S   | 2015.8910 | 975.48  |
| T   | 2116.9367 | 888.45  |
| G   | 2173.9602 | 787.40  |
| T   | 2275.9970 | 701.32  |

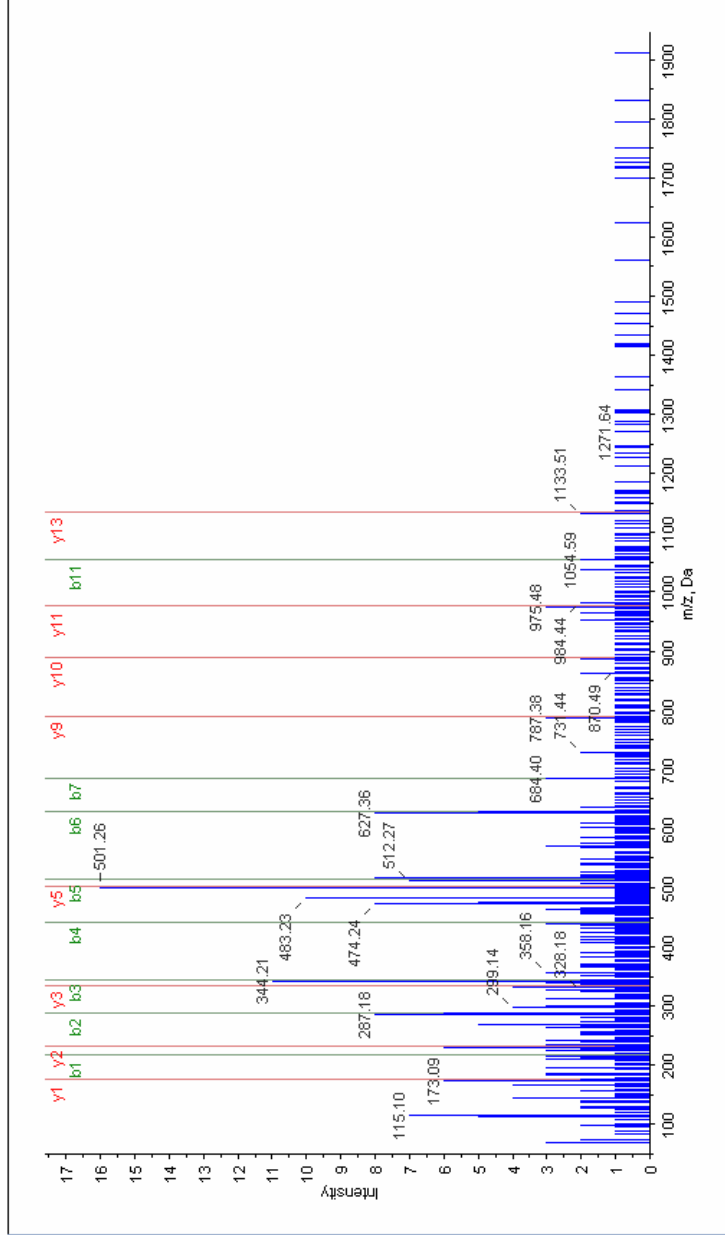

# Protein: SCO4603, Nuol2 [ 1 of 1 ]

Protein Quant

Protein ID

Spectra

Summary Statistics

## Spectrum List

| Spectrum      | Time   | Prec MW   | Prec m/z | Prec z | Best Sequence                                                                                                    | Modifications                                                                               | Conf | Theor MW  | z | 115:114 | %Err | 115:114 |
|---------------|--------|-----------|----------|--------|------------------------------------------------------------------------------------------------------------------|---------------------------------------------------------------------------------------------|------|-----------|---|---------|------|---------|
| 38.1.1.2365.3 | 42.696 | 2158.0144 | 720.3454 | 3      | IAAQQQPDQPGPDHFGQDFDES...<br>IAAQQQPDQPGPDHFGQDFDES...<br>IAAQQQPDQPGPDHFGQDFDES...<br>IAAQQQPDQPGPDHFGQDFDES... | ITRAQ@N-term<br>ITRAQ@N-term<br>ITRAQ@N-term, Deamidatio...<br>ITRAQ@N-term, Oxidation(...) | 99   | 2882.3303 | 4 | 1.1283  | 4.83 | 116:    |

## Peptide ID Hypotheses

| Conf | Sc | Prot N | Sequence                                                                            | Modifications                                                                                | Theor MW  | Theor m/z | z | ΔMass   |
|------|----|--------|-------------------------------------------------------------------------------------|----------------------------------------------------------------------------------------------|-----------|-----------|---|---------|
| 99   | 15 | 519    | IAAQQQPDQPGPDHFGQDFDES...<br>IAAQQQPDQPGPDHFGQDFDES...<br>IAAQQQPDQPGPDHFGQDFDES... | ITRAQ@N-term<br>ITRAQ@N-term<br>ITRAQ@N-term, Deamidatio...<br>ITRAQ@N-term, Oxidation(...)  | 2882.3303 | 721.5899  | 4 | -4.9777 |
| <1   | 9  | 438    | EAAQSLAGRPFAEEDD...<br>EAAQSLAGRPFAEEDD...<br>EAAQSLAGRPFAEEDD...                   | ITRAQ@N-term<br>ITRAQ@N-term, Deamidatio...<br>ITRAQ@N-term, Oxidation(...)                  | 2158.0010 | 720.3409  | 3 | 0.0134  |
| <1   | 8  |        | EAAEQEATLEAVAQPLER...<br>EAAEQEATLEAVAQPLER...<br>EAAEQEATLEAVAQPLER...             | ITRAQ@N-term, Deamidatio...<br>ITRAQ@N-term, Deamidatio...<br>ITRAQ@N-term, Deamidatio...    | 2158.0869 | 720.3736  | 3 | -0.0845 |
| <1   | 8  |        | MAQMATHYITGAGSGI...<br>MAQMATHYITGAGSGI...<br>MAQMATHYITGAGSGI...                   | ITRAQ@N-term, Oxidation(...)<br>ITRAQ@N-term, Oxidation(...)<br>ITRAQ@N-term, Oxidation(...) | 2158.1110 | 720.3776  | 3 | -0.0966 |
| <1   | 7  |        | GEPRVQAYDDELGAAYAR...<br>GEPRVQAYDDELGAAYAR...<br>GEPRVQAYDDELGAAYAR...             | ITRAQ@N-term<br>ITRAQ@N-term<br>ITRAQ@N-term                                                 | 2158.1366 | 720.3862  | 3 | -0.1222 |

## Precursor MS Region

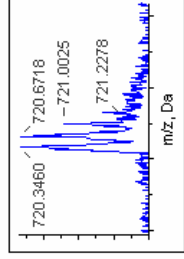

## Fragmentation Evidence for Peptide

ITR IAAQGGPDQPGPDHFGQDFDES...GEGR

| Residue | b         | y         |
|---------|-----------|-----------|
| L       | 258.1934  | 2883.3374 |
| A       | 329.2305  | 2626.1513 |
| A       | 400.2676  | 2555.1142 |
| Q       | 528.3262  | 2484.0770 |
| Q       | 656.3848  | 2356.0185 |
| Q       | 784.4434  | 2227.9599 |
| P       | 881.4961  | 2099.9013 |
| D       | 986.5231  | 2002.8486 |
| Q       | 1124.5816 | 1887.8216 |
| P       | 1221.6344 | 1759.7630 |
| G       | 1278.6559 | 1662.7103 |
| P       | 1375.7086 | 1605.6888 |
| D       | 1490.7356 | 1508.6360 |
| H       | 1627.7945 | 1393.6091 |
| P       | 1724.8473 | 1256.5502 |
| G       | 1781.8687 | 1159.4974 |
| Q       | 1909.9273 | 1102.4760 |
| P       | 2006.9801 | 974.4174  |
| D       | 2122.0070 | 877.3646  |
| E       | 2251.0496 | 762.3377  |
| S       | 2338.0816 | 633.2951  |
| Q       | 2395.1031 | 546.2631  |
| G       | 2523.1817 | 489.2416  |
| E       | 2652.2043 | 361.1830  |
| G       | 2709.2257 | 232.1404  |

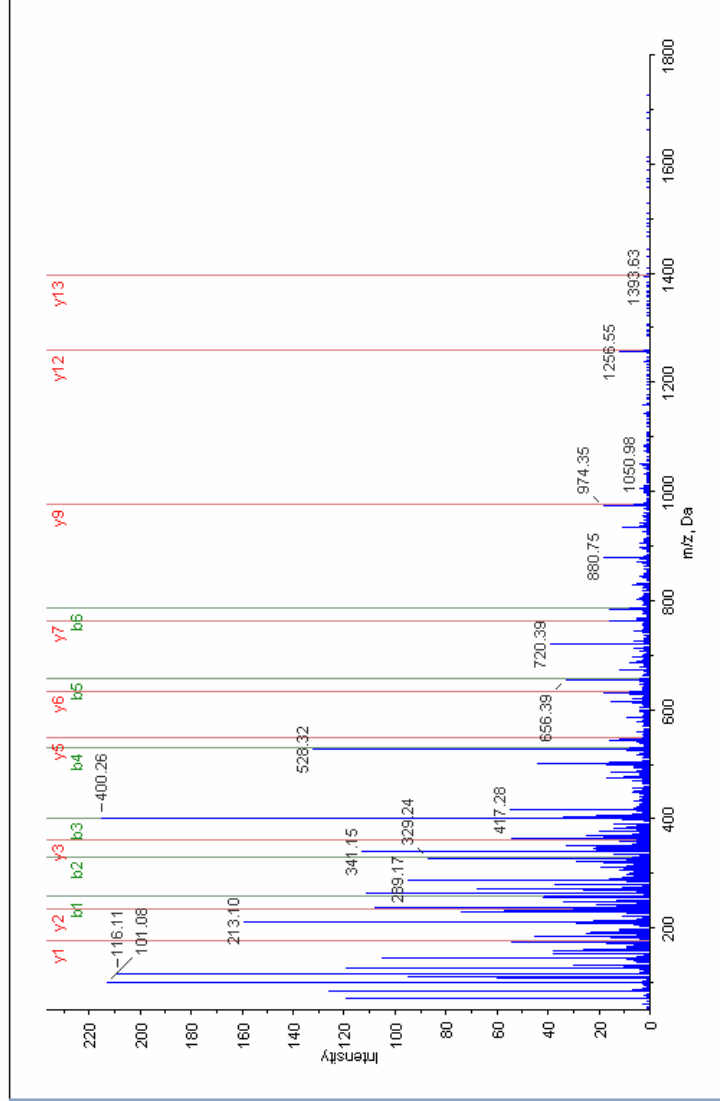

# Protein: SCO4605, Nuok2 [1 of 1]

Protein Quant

Protein ID

Spectra

Summary Statistics

## Spectrum List

| Spectrum      | Time   | Prec MW   | Prec m/z | Prec z | Best Sequence            | Modifications              | Conf | Theor MW  | z | 115:114 | %Err | 115:114 |
|---------------|--------|-----------|----------|--------|--------------------------|----------------------------|------|-----------|---|---------|------|---------|
| 48.1.1.2523.2 | 44.355 | 2670.2371 | 891.0663 | 3      | DTAE GHEPDPDPDTPATGTAAEK | ITRAQ@N-term, ITRAQ(K)@... | 98   | 2670.2137 | 3 | 1.3288  | 9.37 | 116     |

## Peptide ID Hypotheses

| Conf | Sc | Prot ID | Sequence                  | Modifications              | Theor MW  | Theor m/z | z | ΔMass   |
|------|----|---------|---------------------------|----------------------------|-----------|-----------|---|---------|
| 96   | 14 | 587     | DTAE GHEPDPDPDTPATGTAAEK  | ITRAQ@N-term, ITRAQ(K)@... | 2670.2137 | 891.0765  | 3 | 0.0234  |
| <1   | 6  |         | GTGPDGTYRPRGRTHHAYGTSGYDR | No ITRAQ@N-term            | 2670.2760 | 891.0992  | 3 | -0.0389 |

## Precursor MS Region

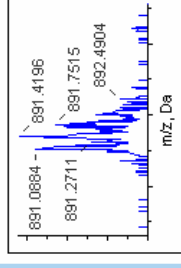

## Fragmentation Evidence for Peptide

ITR |DTAEGHEPDPDTPATGTAAEK|ITR

| Residue | b         | y         |
|---------|-----------|-----------|
| D       | 260.1363  | 2671.2209 |
| T       | 361.1940  | 2412.0919 |
| A       | 432.2211  | 2311.0442 |
| E       | 561.2637  | 2240.0071 |
| G       | 618.2851  | 2110.9645 |
| H       | 755.3440  | 2053.9431 |
| E       | 884.3866  | 1916.8842 |
| P       | 981.4394  | 1787.8416 |
| D       | 1096.4663 | 1690.7688 |
| G       | 1153.4878 | 1575.7619 |
| P       | 1250.5406 | 1518.7404 |
| D       | 1365.5675 | 1421.6676 |
| T       | 1486.6152 | 1306.6607 |
| D       | 1581.6421 | 1205.6130 |
| T       | 1682.6898 | 1090.5661 |
| P       | 1779.7426 | 989.5384  |
| A       | 1850.7797 | 892.4856  |
| T       | 1951.8274 | 821.4485  |
| G       | 2008.8488 | 720.4008  |
| T       | 2109.8965 | 663.3794  |
| A       | 2180.9336 | 562.3317  |
| A       | 2251.9707 | 491.2946  |
| E       | 2381.0133 | 420.2575  |
| K[ITR]  | 2653.2104 | 291.2149  |

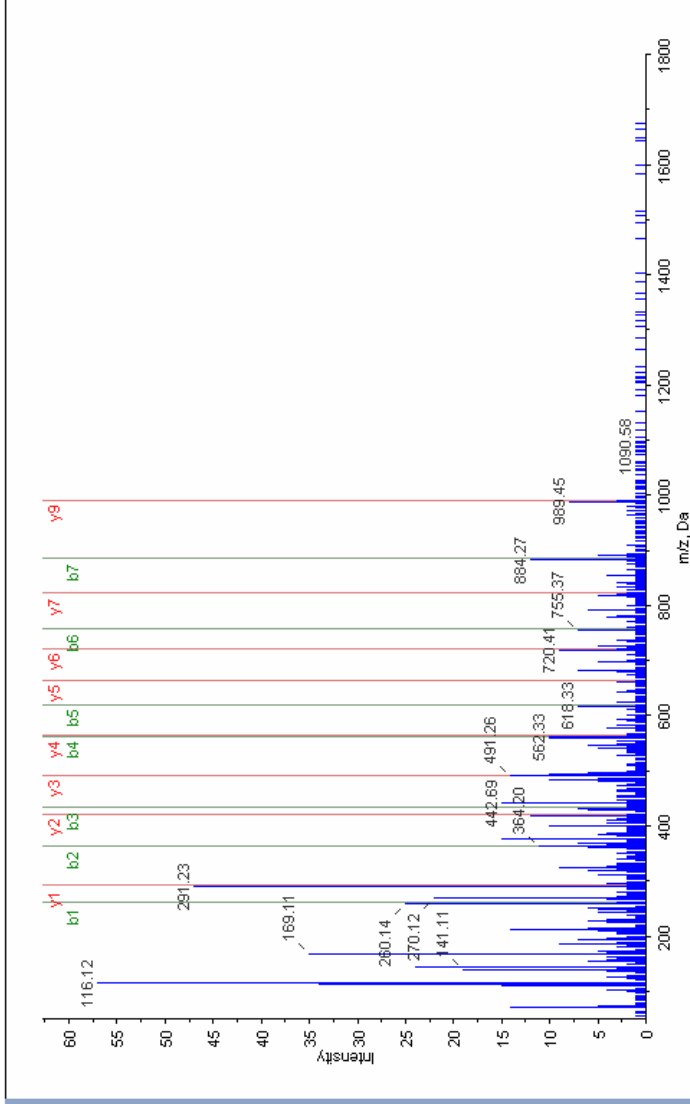



# Protein: SCO4979 [1 of 2]

Protein Quant

Protein ID

Spectra

Summary Statistics

## Spectrum List

| Spectrum      | Time   | Prec MW   | Prec m/z | Prec z | Best Sequence   | Modifications              | Conf | Theor MW  | z | 115:114 | %Err | 115:114 |
|---------------|--------|-----------|----------|--------|-----------------|----------------------------|------|-----------|---|---------|------|---------|
| 56.1.1.2404.2 | 52.361 | 1827.9717 | 610.3312 | 3      | DEGVLAERHMLVLIK | ITRAQ@N-term, ITRAQ(K)@... | 99   | 1827.9797 | 3 | 0.8682  | 4.56 | 116     |

## Peptide ID Hypotheses

| Conf | Sc | Prot # | Sequence           | Modifications               | Theor MW  | Theor m/z | z | ΔMass   |
|------|----|--------|--------------------|-----------------------------|-----------|-----------|---|---------|
| 99   | 14 | 506    | DEGVLAERHMLVLIK    | ITRAQ@N-term, ITRAQ(K)@...  | 1827.9797 | 610.3339  | 3 | -0.0060 |
| <1   | 8  |        | GFGGLLHMVGYEALIQYR | No ITRAQ@N-term             | 1828.0319 | 610.3513  | 3 | -0.0603 |
| <1   | 7  |        | DIAATIQPEQDDLYR    | ITRAQ@N-term, Deamidatio... | 1827.9336 | 610.3165  | 3 | 0.0381  |
| <1   | 7  |        | IDRAGARTDGLGDVVR   | ITRAQ@N-term                | 1828.0037 | 610.3418  | 3 | -0.0320 |
| <1   | 7  |        | RMPVGAVGITCAVER    | ITRAQ@N-term, Oxidation(... | 1828.0223 | 610.3481  | 3 | -0.0507 |

## Precursor MS Region

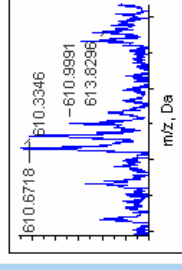

## Fragmentation Evidence for Peptide

ITR DEGVLAERHMLVLIK(ITR)

| Residue | b         | y         |
|---------|-----------|-----------|
| D       | 260.1363  | 1828.9870 |
| E       | 389.1789  | 1569.8579 |
| G       | 446.2003  | 1440.8154 |
| W       | 632.2797  | 1363.7939 |
| L       | 745.3637  | 1197.7146 |
| A       | 816.4008  | 1084.6305 |
| E       | 945.4434  | 1013.5934 |
| H       | 1082.5023 | 884.5508  |
| M       | 1213.5428 | 747.4919  |
| L       | 1326.6269 | 616.4514  |
| V       | 1425.6953 | 503.3673  |
| L       | 1538.7794 | 404.2989  |
| K(ITR)  | 1810.9764 | 291.2149  |

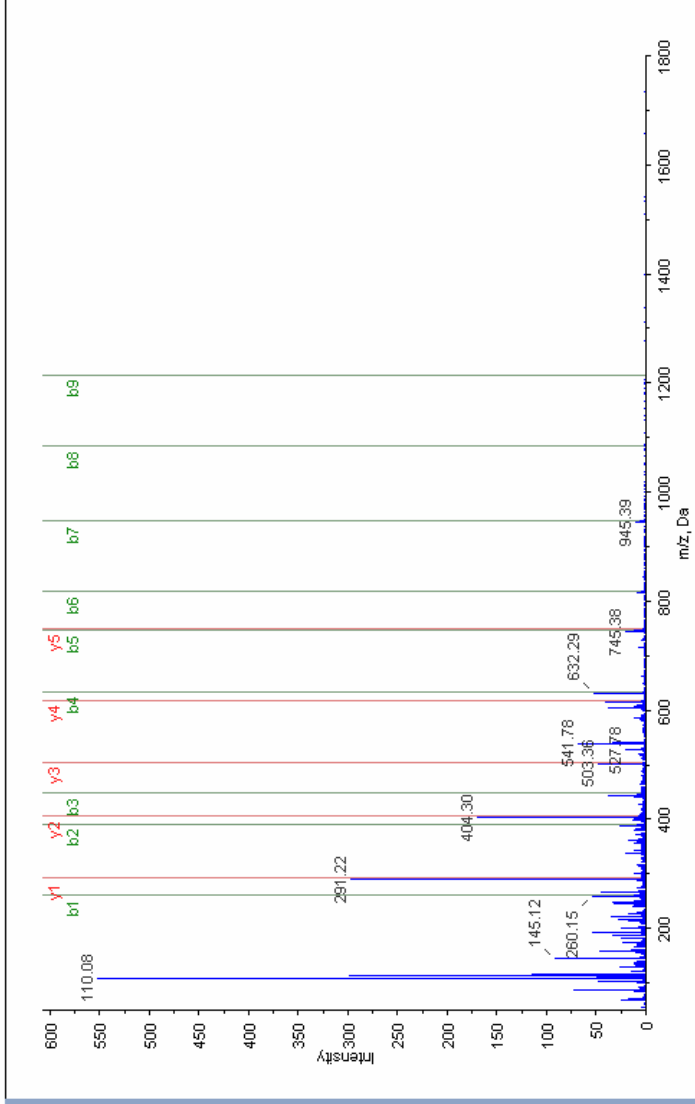

# Protein: SCO4979 [1 of 2]

Protein Quant

Protein ID

Spectra

Summary Statistics

## Spectrum List

| Spectrum      | Time   | Prec MW   | Prec m/z | Prec z | Best Sequence | Modifications              | Conf | Theor MW  | z | 115:114 | %Err 115:114 |
|---------------|--------|-----------|----------|--------|---------------|----------------------------|------|-----------|---|---------|--------------|
| 56.1.1.2405.2 | 52.482 | 1827.9720 | 610.3313 | 3      | DEGVLAEHMLVLK | ITRAQ@N-term, ITRAQ(K)@... | 99   | 1827.9797 | 3 | 1.0970  | 4.36         |

## Peptide ID Hypotheses

| Conf | Sc | Prot ID | Sequence        | Modifications                | Theor MW  | Theor m/z | z | ΔMass   |
|------|----|---------|-----------------|------------------------------|-----------|-----------|---|---------|
| 99   | 15 | 506     | DEGVLAEHMLVLK   | ITRAQ@N-term, ITRAQ(K)@...   | 1827.9797 | 610.3339  | 3 | -0.0076 |
| <1   | 6  |         | ALVYGVSNYSPEQTR | ITRAQ@N-term, Deamidatio ... | 1827.9125 | 610.3114  | 3 | 0.0596  |
| <1   | 6  |         | CYPMSTPYTGAVQRR | ITRAQ@N-term                 | 1827.9747 | 610.3322  | 3 | -0.0027 |
| <1   | 6  |         | SRRGAEIISVLAQER | ITRAQ@N-term                 | 1828.0401 | 610.3540  | 3 | -0.0680 |
| <1   | 5  |         | EDNSFVLPLELRPR  | ITRAQ@N-term                 | 1827.9965 | 610.3394  | 3 | -0.0245 |

## Precursor MS Region

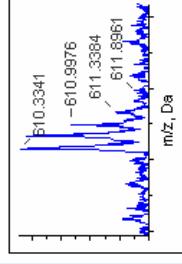

## Fragmentation Evidence for Peptide

ITR | DEGVLAEHMLVLK|ITR

| Residue | b         | y         |
|---------|-----------|-----------|
| D       | 260.1363  | 1828.9870 |
| E       | 389.1789  | 1568.8579 |
| G       | 446.2003  | 1440.8154 |
| W       | 632.2797  | 1363.7939 |
| L       | 745.3637  | 1197.7146 |
| A       | 816.4008  | 1084.6305 |
| E       | 945.4434  | 1013.5934 |
| H       | 1082.5023 | 884.5508  |
| M       | 1213.5428 | 747.4919  |
| L       | 1326.6269 | 616.4514  |
| V       | 1425.6953 | 503.3673  |
| L       | 1538.7794 | 404.2989  |
| K ITR   | 1810.9764 | 291.2149  |

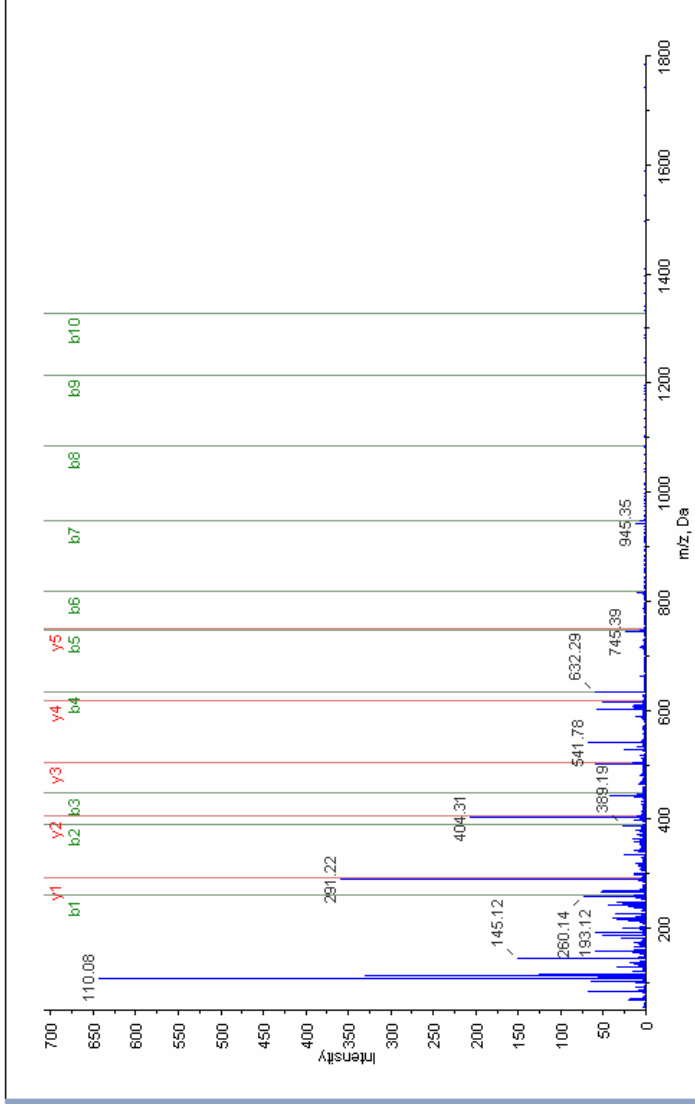

# Protein: SC05042, FumC [1 of 2]

Protein Quant

Protein ID

Spectra

Summary Statistics

## Spectrum List

| Spectrum      | Time   | Prec MW   | Prec m/z | Prec z | Best Sequence  | Modifications | Conf | Theor MW  | z | 115:114 | %Err | 115:114 |
|---------------|--------|-----------|----------|--------|----------------|---------------|------|-----------|---|---------|------|---------|
| 31.1.1.1082.5 | 50.632 | 1747.9816 | 583.6678 | 3      | DLIPALDHLGALER | ITRAG@N-term  | 99   | 1746.9750 | 3 |         |      | 116     |

## Peptide ID Hypotheses

| Conf | Sc | Prot ID | Sequence         | Modifications               | Theor MW  | Theor m/z | z | ΔMass  |
|------|----|---------|------------------|-----------------------------|-----------|-----------|---|--------|
| 99   | 13 | 750     | DLIPALDHLGALER   | ITRAG@N-term                | 1746.9750 | 583.3323  | 3 | 1.0065 |
| <1   | 6  |         | EYAPGVTYEGFPQIIR | No ITRAG@N-term             | 1747.9469 | 583.6562  | 3 | 0.0347 |
| <1   | 6  |         | IGDLHGDRRLGALAFR | No ITRAG@N-term             | 1747.9442 | 583.6553  | 3 | 0.0374 |
| <1   | 5  |         | AJGMYRPEYKRR     | No ITRAG@N-term, ITRAG@...  | 1747.9638 | 583.6619  | 3 | 0.0178 |
| <1   | 5  |         | LGTMYRLLSVAMPR   | ITRAG@N-term, Deamidatio... | 1747.9492 | 583.6570  | 3 | 0.0324 |

## Precursor MS Region

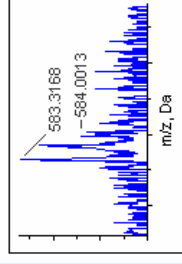

## Fragmentation Evidence for Peptide

ITR DLIPALDHLGALER

| Res | b         | y         |
|-----|-----------|-----------|
| D   | 260.1363  | 1747.9823 |
| L   | 373.2203  | 1488.8533 |
| I   | 486.3044  | 1375.7692 |
| P   | 583.3572  | 1262.6852 |
| A   | 654.3943  | 1165.6324 |
| L   | 767.4784  | 1094.5953 |
| D   | 882.5053  | 981.5112  |
| H   | 1019.5642 | 866.4843  |
| L   | 1132.6483 | 729.4254  |
| A   | 1203.6854 | 616.3413  |
| G   | 1260.7068 | 545.3042  |
| A   | 1331.7440 | 488.2827  |
| L   | 1444.8280 | 417.2456  |
| E   | 1573.8706 | 304.1815  |
| R   | 1729.9717 | 175.1190  |

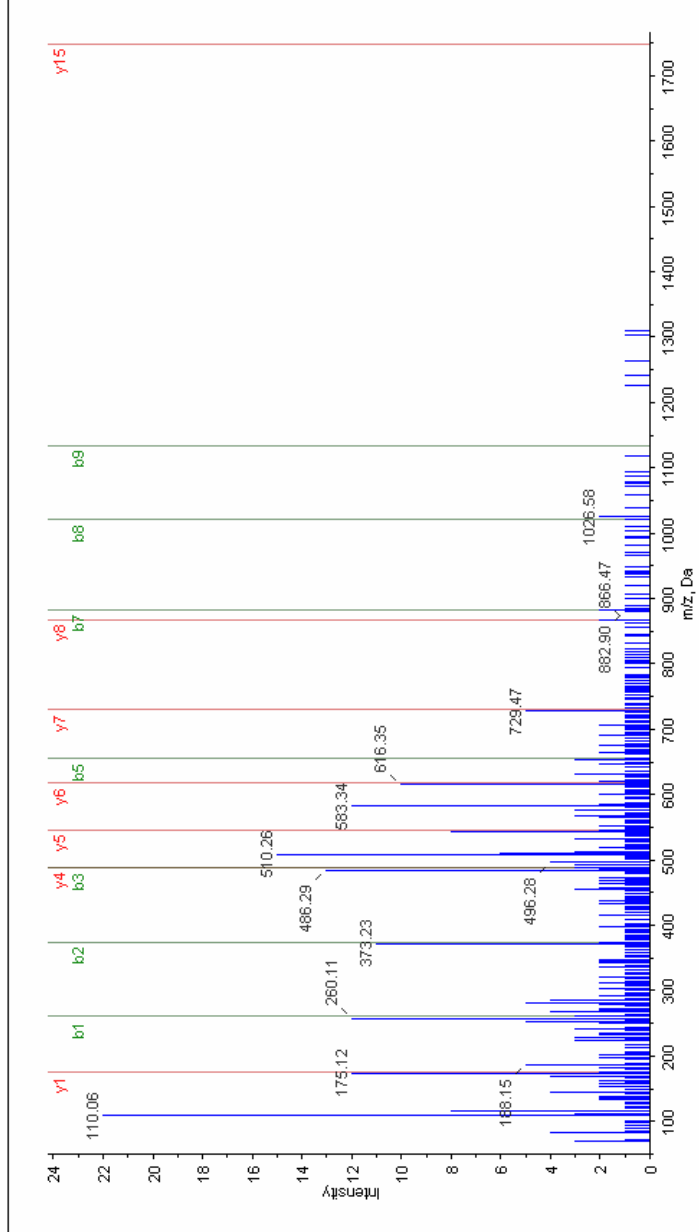

# Protein: SC05042, FumC [2 of 2]

Protein Quant

Protein ID

Spectra

Summary Statistics

## Spectrum List

| Spectrum      | Time   | Prec MW   | Prec m/z | Prec z | Best Sequence  | Modifications | Conf | Theor MW  | z | 115:114 | %Err | 115:114 |
|---------------|--------|-----------|----------|--------|----------------|---------------|------|-----------|---|---------|------|---------|
| 50.1.1.1064.4 | 51.575 | 1746.9734 | 583.3316 | 3      | DLIPALDHLGALER | ITRAQ@N-term  | 99   | 1746.9750 | 3 |         |      | 116     |

## Peptide ID Hypotheses

| Conf | Sc | Prot N | Sequence        | Modifications               | Theor MW  | Theor m/z | z | ΔMass   |
|------|----|--------|-----------------|-----------------------------|-----------|-----------|---|---------|
| 99   | 12 | 750    | DLIPALDHLGALER  | ITRAQ@N-term                | 1746.9750 | 583.3323  | 3 | -0.0016 |
| <1   | 5  | 621    | AAQQTLPPHLATTPR | ITRAQ@N-term, Deamidatio... | 1746.9366 | 583.3201  | 3 | 0.0348  |
| <1   | 6  |        | LYAEALGDDRVHLAR | No ITRAQ@N-term             | 1746.9740 | 583.3319  | 3 | -0.0005 |
| <1   | 6  |        | VIMKYLDQVDPR    | ITRAQ@N-term, ITRAQ(K)@4    | 1746.9872 | 583.3363  | 3 | -0.0136 |
| <1   | 5  |        | DLLLAHASHLDGR   | ITRAQ@N-term                | 1746.9287 | 583.3168  | 3 | 0.0447  |

## Precursor MS Region

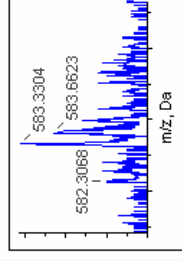

## Fragmentation Evidence for Peptide

ITR | DLIPALDHLGALER

| Res | b         | y         |
|-----|-----------|-----------|
| D   | 260.1363  | 1747.9823 |
| L   | 373.2203  | 1488.8533 |
| I   | 486.3044  | 1375.7692 |
| P   | 583.3572  | 1262.6852 |
| A   | 654.3943  | 1165.6324 |
| L   | 767.4784  | 1094.5953 |
| D   | 882.5053  | 981.5112  |
| H   | 1019.5642 | 868.4843  |
| L   | 1132.6483 | 729.4254  |
| A   | 1203.6854 | 616.3413  |
| G   | 1260.7068 | 545.3042  |
| A   | 1331.7440 | 486.2827  |
| L   | 1444.8280 | 417.2456  |
| E   | 1573.8706 | 304.1615  |
| R   | 1729.9717 | 175.1190  |

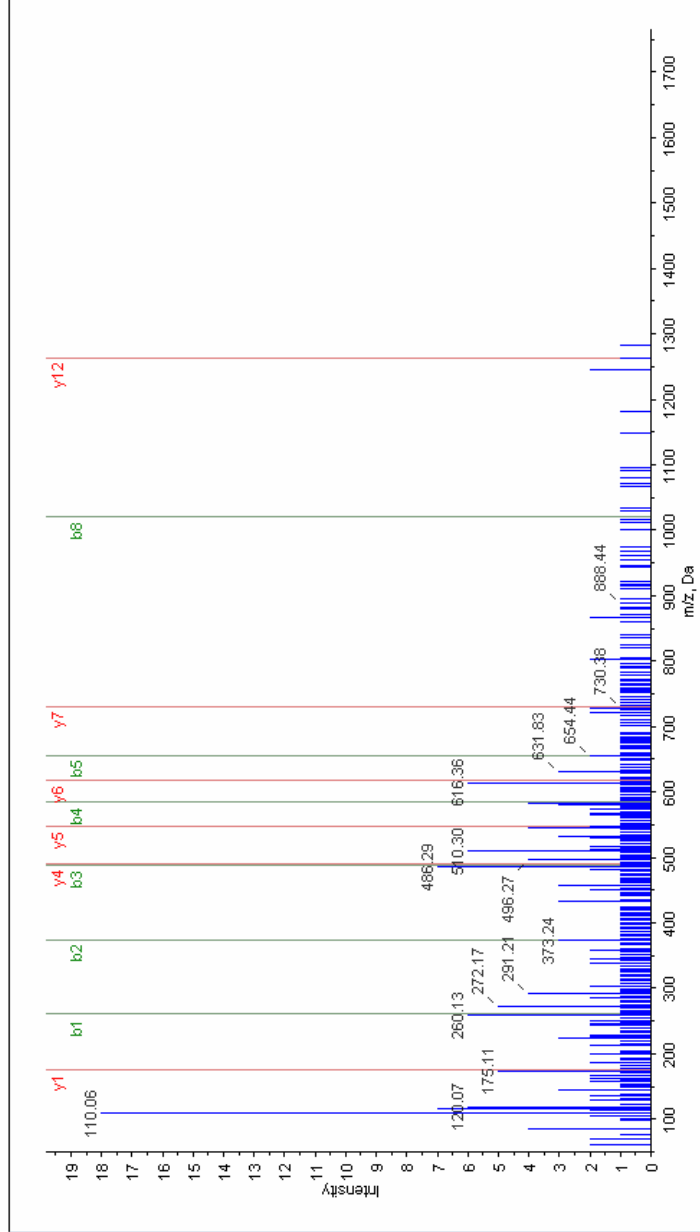

# Protein: SC05059, PpgK [1 of 2]

Protein Quant

Protein ID

Spectra

Summary Statistics

## Spectrum List

| Spectrum     | Time   | Prec MW   | Prec m/z | Prec z | Best Sequence     | Modifications              | Conf | Theor MW  | z | 115:114 | %Err  | 115:114 |
|--------------|--------|-----------|----------|--------|-------------------|----------------------------|------|-----------|---|---------|-------|---------|
| 1.1.1.1007.4 | 32.126 | 1961.0890 | 654.7036 | 3      | VLTPHPATPDGVADGVK | ITRAQ@N-term, ITRAQ(K)@... | 99   | 1961.0824 | 3 | 0.9284  | 13.80 | 116     |

## Peptide ID Hypotheses

| Conf | Sc | Prot N | Sequence             | Modifications                 | Theor MW  | Theor m/z | z | ΔMass   |
|------|----|--------|----------------------|-------------------------------|-----------|-----------|---|---------|
| 99   | 15 | 679    | VLTPHPATPDGVADGVK    | ITRAQ@N-term, ITRAQ(K)@...    | 1961.0824 | 654.7014  | 3 | 0.0065  |
| <1   | 5  | 75     | ILSGGYDSTALYPFK      | ITRAQ@N-term, ITRAQ(K)@...    | 1961.1188 | 654.7135  | 3 | -0.0298 |
| <1   | 7  |        | EYVYPVATPADLPSARSK   | PGA of E@N-term, ITRAQ(K)@... | 1961.1066 | 654.7095  | 3 | -0.0177 |
| <1   | 7  |        | LSGAAGRWLMAAYLVAR    | ITRAQ@N-term, Deamidatio...   | 1961.0815 | 654.7011  | 3 | 0.0075  |
| <1   | 7  |        | PEGVFLGSLNLAVALAAGSK | ITRAQ@N-term, ITRAQ(K)@...    | 1961.0824 | 654.7014  | 3 | 0.0065  |

## Precursor MS Region

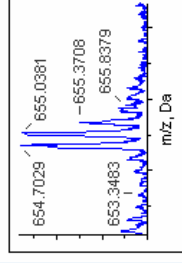

## Fragmentation Evidence for Peptide

ITR | VLTPHPATPDGVADGVK(ITR)

| Res  | b         | y         |
|------|-----------|-----------|
| V    | 244.1778  | 1962.0898 |
| L    | 357.2618  | 1718.9194 |
| T    | 458.3095  | 1605.8353 |
| P    | 555.3623  | 1504.7876 |
| H    | 692.4212  | 1407.7349 |
| P    | 789.4739  | 1270.6769 |
| A    | 860.5110  | 1173.6232 |
| T    | 961.5587  | 1102.5861 |
| P    | 1058.6115 | 1001.5384 |
| D    | 1173.6384 | 904.4856  |
| G    | 1230.6599 | 785.4587  |
| V    | 1329.7283 | 732.4372  |
| A    | 1400.7654 | 633.3688  |
| D    | 1515.7924 | 562.3317  |
| G    | 1572.8138 | 447.3047  |
| V    | 1671.8822 | 390.2833  |
| K(I) | 1944.0793 | 291.2149  |

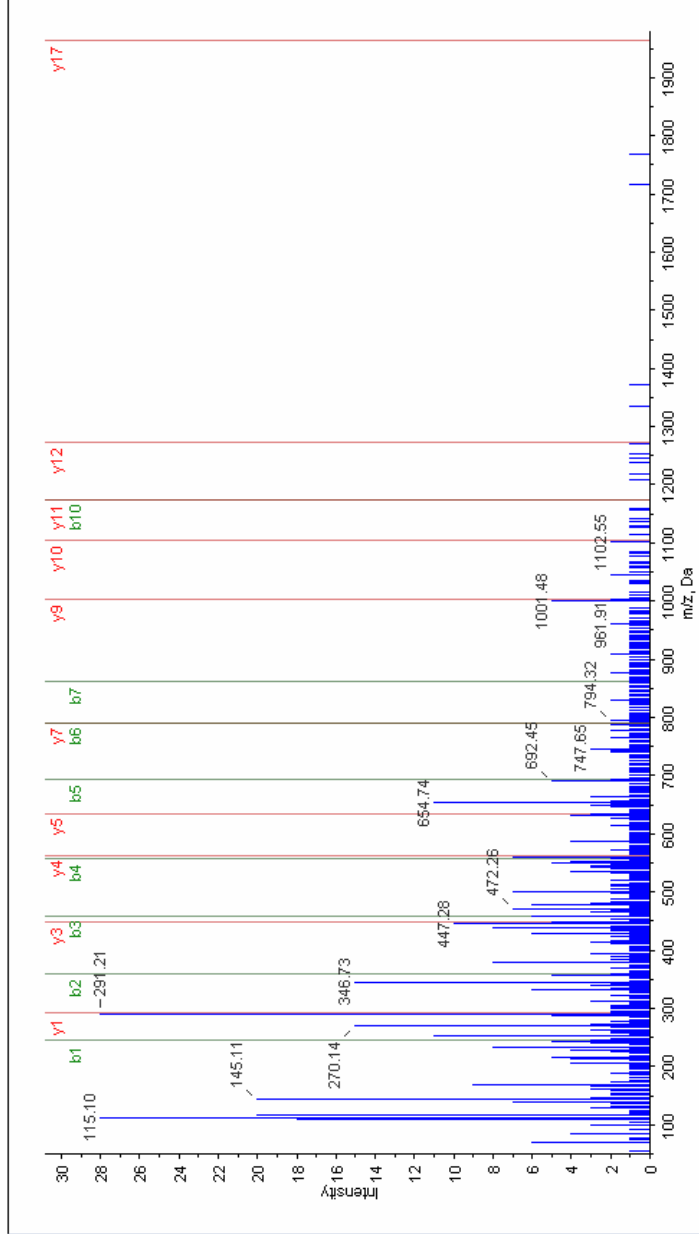

# Protein: SC05059, PpgK [2 of 2]

Protein Quant

Protein ID

Spectra

Summary Statistics

## Spectrum List

| Spectrum     | Time   | Prec MW   | Prec m/z | Prec z | Best Sequence     | Modifications              | Conf | Theor MW  | z | 115:114 | %Err | 115:114 |
|--------------|--------|-----------|----------|--------|-------------------|----------------------------|------|-----------|---|---------|------|---------|
| 32.1.1.961.2 | 30.891 | 1961.0903 | 654.7040 | 3      | VLTPHPATPDGVADGVK | ITRAQ@N-term, ITRAQ(K)@... | 99   | 1961.0826 | 3 | 0.9754  | 6.38 | 116:    |

## Peptide ID Hypotheses

| Conf | Sc | Prot N | Sequence          | Modifications               | Theor MW  | Theor m/z | z | ΔMass   |
|------|----|--------|-------------------|-----------------------------|-----------|-----------|---|---------|
| 99   | 18 | 679    | VLTPHPATPDGVADGVK | ITRAQ@N-term, ITRAQ(K)@...  | 1961.0826 | 654.7015  | 3 | 0.0077  |
| <1   | 8  |        | ALSAKGSKDPATGQK   | No ITRAQ@N-term, ITRAQ@...  | 1961.1271 | 654.7163  | 3 | -0.0368 |
| <1   | 7  |        | AAELMERVGLDASLAK  | ITRAQ@N-term, ITRAQ(K)@...  | 1961.0860 | 654.7026  | 3 | 0.0044  |
| <1   | 6  |        | AAPAYLDSLAVVCRNK  | ITRAQ@N-term, MMTS(C)@...   | 1961.0682 | 654.6967  | 3 | 0.0221  |
| <1   | 6  |        | AQIDGITVGGKIGTAQR | ITRAQ@N-term, Deamidatio... | 1961.0786 | 654.7001  | 3 | 0.0118  |

## Precursor MS Region

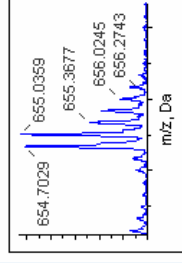

## Fragmentation Evidence for Peptide

ITR | VLTPHPATPDGVADGVK(K)ITR

| Res  | b         | y         |
|------|-----------|-----------|
| V    | 244.1778  | 1962.0898 |
| L    | 357.2618  | 1718.9194 |
| T    | 458.3095  | 1605.8353 |
| P    | 555.3623  | 1504.7876 |
| H    | 692.4212  | 1407.7349 |
| P    | 789.4739  | 1270.6759 |
| A    | 860.5110  | 1173.6232 |
| T    | 961.5587  | 1102.5861 |
| P    | 1058.6115 | 1001.5384 |
| D    | 1173.6384 | 904.4856  |
| G    | 1230.6599 | 789.4587  |
| V    | 1329.7283 | 732.4372  |
| A    | 1400.7654 | 633.3688  |
| D    | 1515.7924 | 562.3317  |
| G    | 1572.8138 | 447.3047  |
| V    | 1671.8822 | 390.2833  |
| K(I) | 1944.0793 | 291.2149  |

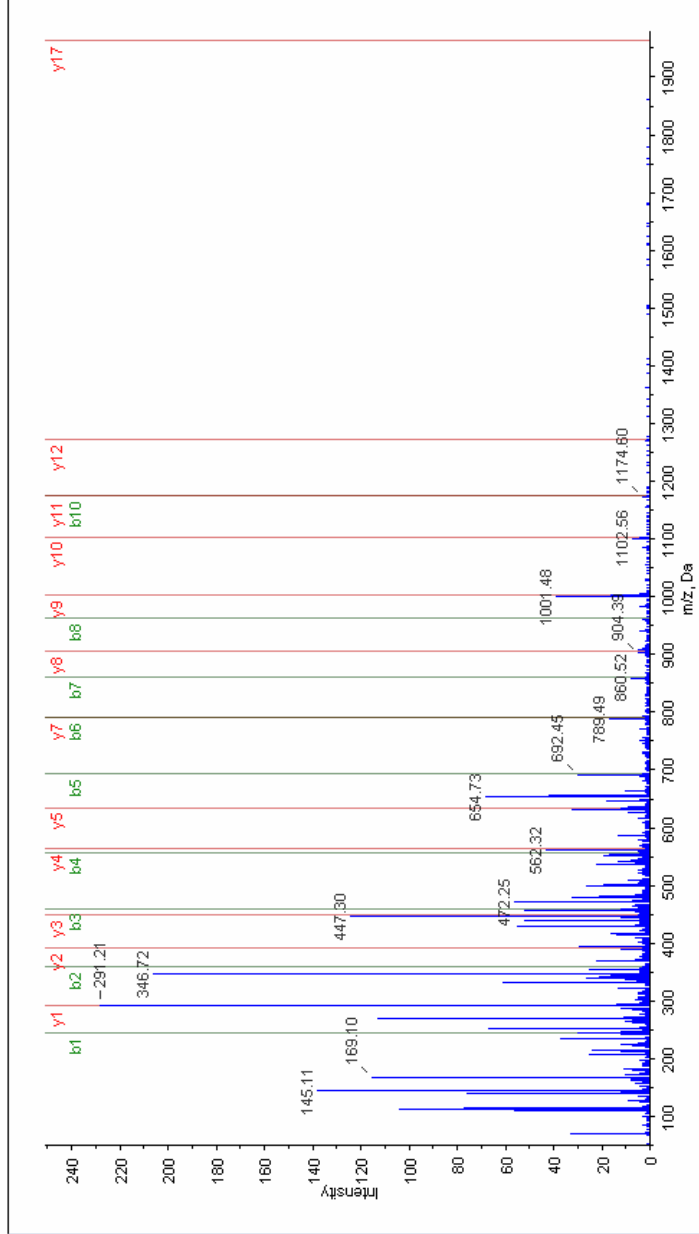

# Protein: SC05084, ActII-3 [1 of 1]

Protein Quant

Protein ID

Spectra

Summary Statistics

## Spectrum List

| Spectrum      | Time   | Prec MW   | Prec m/z | Prec z | Best Sequence          | Modifications | Conf | Theor MW  | z | 115:114 | %Err | 115:114 |
|---------------|--------|-----------|----------|--------|------------------------|---------------|------|-----------|---|---------|------|---------|
| 50.1.1.1011.5 | 34.795 | 2259.1226 | 754.0481 | 3      | ADATHFADGTGVVGEFYGVPVR | ITRAQ@N-term  | 99   | 2259.1043 | 3 |         |      | 116     |

## Peptide ID Hypotheses

| Conf | Sc | Prot N | Sequence               | Modifications               | Theor MW  | Theor m/z | z | ΔMass   |
|------|----|--------|------------------------|-----------------------------|-----------|-----------|---|---------|
| 99   | 22 | 536    | ADATHFADGTGVVGEFYGVPVR | ITRAQ@N-term                | 2259.1043 | 754.0420  | 3 | 0.0183  |
| <1   | 8  |        | EKPGMCHTCAQPNQVSYAAVR  | No ITRAQ@N-term, ITRAQ@C... | 2259.0793 | 754.0337  | 3 | 0.0432  |
| <1   | 7  |        | AQCELFDAAGFLPTFTDVR    | ITRAQ@N-term, Deamidatio... | 2259.1004 | 754.0407  | 3 | 0.0221  |
| <1   | 7  |        | DGTDALTSVAVAGRIILADERR | No ITRAQ@N-term             | 2259.1092 | 754.0437  | 3 | 0.0134  |
| <1   | 7  |        | LFIERGFHITLAEIADAAR    | No ITRAQ@N-term             | 2259.1649 | 754.0622  | 3 | -0.0423 |

## Precursor MS Region

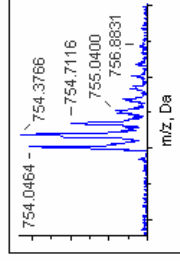

## Fragmentation Evidence for Peptide

ITR ADATHFADGTGVVGEFYGVPVR

| Res | b         | y         |
|-----|-----------|-----------|
| A   | 216.1465  | 2260.1115 |
| D   | 331.1734  | 2044.9723 |
| A   | 402.2105  | 1929.9454 |
| T   | 503.2582  | 1858.9082 |
| H   | 640.3171  | 1757.8606 |
| F   | 787.3855  | 1620.8016 |
| A   | 858.4226  | 1473.7332 |
| D   | 973.4496  | 1402.6961 |
| G   | 1030.4710 | 1287.6692 |
| T   | 1131.5187 | 1230.6477 |
| G   | 1188.5402 | 1125.6000 |
| V   | 1287.6086 | 1072.5786 |
| V   | 1386.6770 | 973.5102  |
| G   | 1443.6985 | 874.4417  |
| E   | 1572.7411 | 817.4203  |
| P   | 1669.7938 | 688.3777  |
| Y   | 1832.8572 | 591.3249  |
| G   | 1889.8786 | 428.2616  |
| P   | 1986.9314 | 371.2401  |
| V   | 2085.9998 | 274.1874  |
| R   | 2242.1009 | 175.1190  |

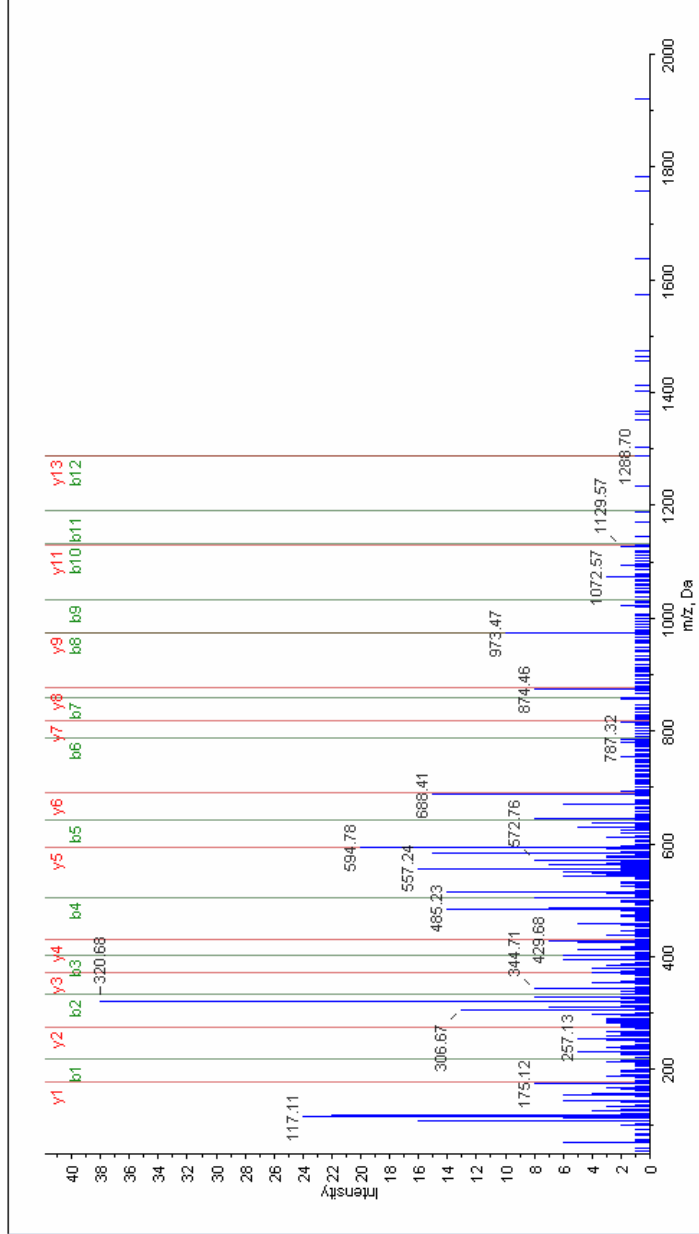

# Protein: SC05086, ActII [1 of 18]

Protein Quant

Protein ID

Spectra

Summary Statistics

## Spectrum List

| Spectrum      | Time   | Prec MW   | Prec m/z | Prec z | Best Sequence    | Modifications | Conf | Theor MW  | z | 115:114 | %Err | 115:114 |
|---------------|--------|-----------|----------|--------|------------------|---------------|------|-----------|---|---------|------|---------|
| 20.1.1.1087.2 | 58.588 | 1724.9767 | 575.9955 | 3      | SYFPEIEALVAAVVER | ITRAQ@N-term  | 99   | 1724.9794 | 3 |         |      | 116     |

## Peptide ID Hypotheses

| Conf | Sc | Prot N | Sequence           | Modifications              | Theor MW  | Theor m/z | z | ΔMass   |
|------|----|--------|--------------------|----------------------------|-----------|-----------|---|---------|
| 99   | 17 | 744    | SYFPEIEALVAAVVER   | ITRAQ@N-term               | 1724.9794 | 576.0004  | 3 | -0.0027 |
| <1   | 9  |        | ALSLGMPDPYPTLAER   | No ITRAQ@N-term            | 1724.9243 | 575.9820  | 3 | 0.0524  |
| <1   | 8  |        | GYLAENVRVYKPGGR    | No ITRAQ@N-term, ITRAQ@... | 1725.0205 | 576.0141  | 3 | -0.0438 |
| <1   | 7  |        | PAAYVPLPIGNGEOR    | ITRAQ@N-term               | 1724.9331 | 575.9850  | 3 | 0.0435  |
| <1   | 7  |        | TALLIWAADALEVAAPDR | No ITRAQ@N-term            | 1724.9308 | 575.9842  | 3 | 0.0459  |

## Precursor MS Region

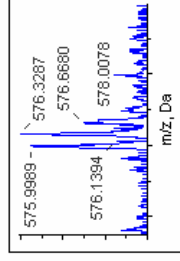

## Fragmentation Evidence for Peptide

ITR | SYFPEIEALVAAVVER

| Res | b         | y         |
|-----|-----------|-----------|
| S   | 232.1414  | 1725.9867 |
| V   | 331.2098  | 1494.8526 |
| P   | 428.2625  | 1395.7842 |
| E   | 557.3051  | 1298.7314 |
| I   | 670.3892  | 1169.6868 |
| E   | 799.4318  | 1056.6048 |
| A   | 870.4689  | 927.5622  |
| L   | 983.5530  | 856.5251  |
| V   | 1082.6214 | 743.4410  |
| A   | 1153.6585 | 644.3726  |
| A   | 1224.6956 | 573.3355  |
| V   | 1323.7640 | 502.2984  |
| V   | 1422.8324 | 403.2300  |
| E   | 1551.8750 | 304.1615  |
| R   | 1707.9761 | 175.1190  |

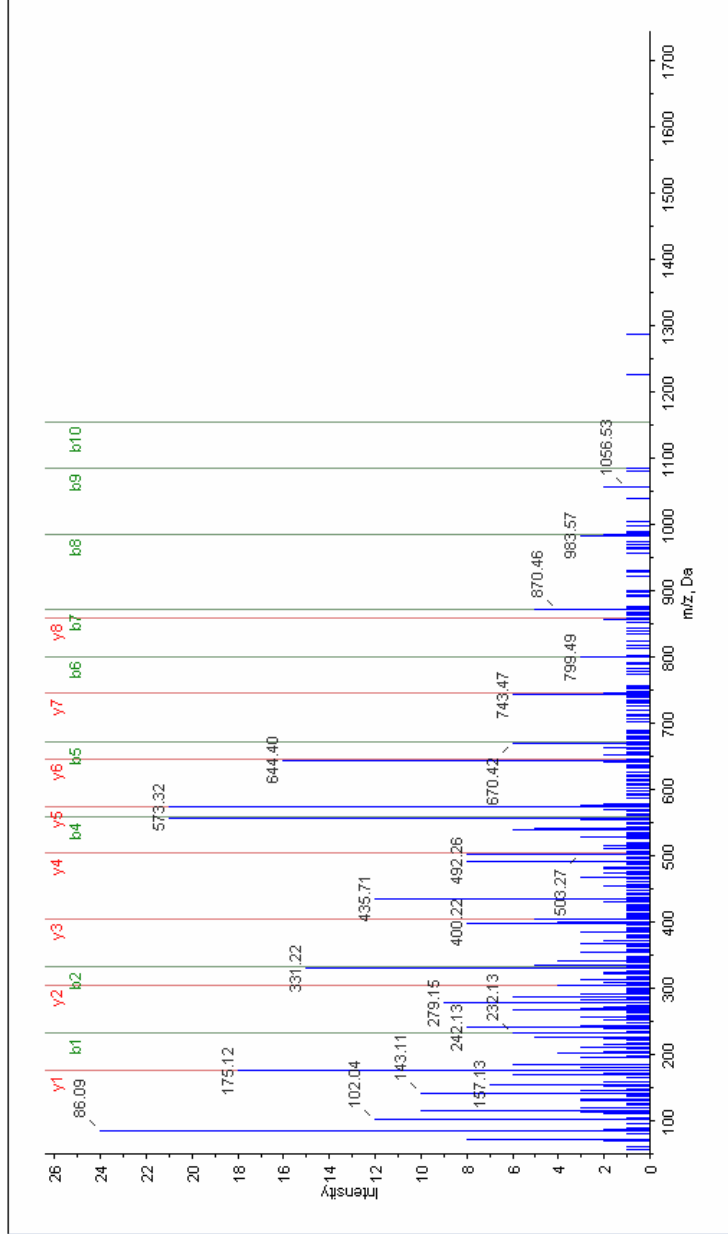



# Protein: SC05086, ActII [2 of 18]

Protein Quant

Protein ID

Spectra

Summary Statistics

## Spectrum List

| Spectrum      | Time   | Prec MW   | Prec m/z | Prec z | Best Sequence    | Modifications | Conf | Theor MW  | z | 115:114 | %Err | 115:114 |
|---------------|--------|-----------|----------|--------|------------------|---------------|------|-----------|---|---------|------|---------|
| 20.1.1.1088.3 | 58.870 | 1724.9734 | 863.4940 | 2      | SYFPEIEALVAAVVER | ITRAQ@N-term  | 99   | 1724.9794 | 2 |         |      | 116     |

## Peptide ID Hypotheses

| Conf | Sc | Prot N | Sequence          | Modifications              | Theor MW  | Theor m/z | z | ΔMass   |
|------|----|--------|-------------------|----------------------------|-----------|-----------|---|---------|
| 99   | 16 | 744    | SYFPEIEALVAAVVER  | ITRAQ@N-term               | 1724.9794 | 863.4970  | 2 | -0.0060 |
| <1   | 7  |        | APSVFTQVGLGAVIPGR | No ITRAQ@N-term            | 1724.9573 | 863.4859  | 2 | 0.0161  |
| <1   | 7  |        | NYAKLVEPPTDSR     | No ITRAQ@N-term, ITRAQ@... | 1724.9655 | 863.4900  | 2 | 0.0079  |
| <1   | 7  |        | PAAYVPLPIGNGEOR   | ITRAQ@N-term               | 1724.9331 | 863.4738  | 2 | 0.0403  |
| <1   | 7  |        | TALLVAADALEVAPDR  | No ITRAQ@N-term            | 1724.9308 | 863.4727  | 2 | 0.0426  |

## Precursor MS Region

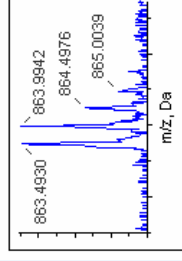

## Fragmentation Evidence for Peptide

ITR | SYFPEIEALVAAVVER

| Res | b         | y         |
|-----|-----------|-----------|
| S   | 232.1414  | 1725.9867 |
| V   | 331.2098  | 1494.8526 |
| P   | 428.2625  | 1395.7842 |
| E   | 557.3051  | 1298.7314 |
| I   | 670.3892  | 1169.6888 |
| E   | 799.4318  | 1056.6048 |
| A   | 870.4689  | 927.5622  |
| L   | 983.5530  | 856.5251  |
| V   | 1082.6214 | 743.4410  |
| A   | 1153.6585 | 644.3726  |
| A   | 1224.6956 | 573.3355  |
| V   | 1323.7640 | 502.2984  |
| V   | 1422.8324 | 403.2300  |
| E   | 1551.8750 | 304.1615  |
| R   | 1707.9761 | 175.1190  |

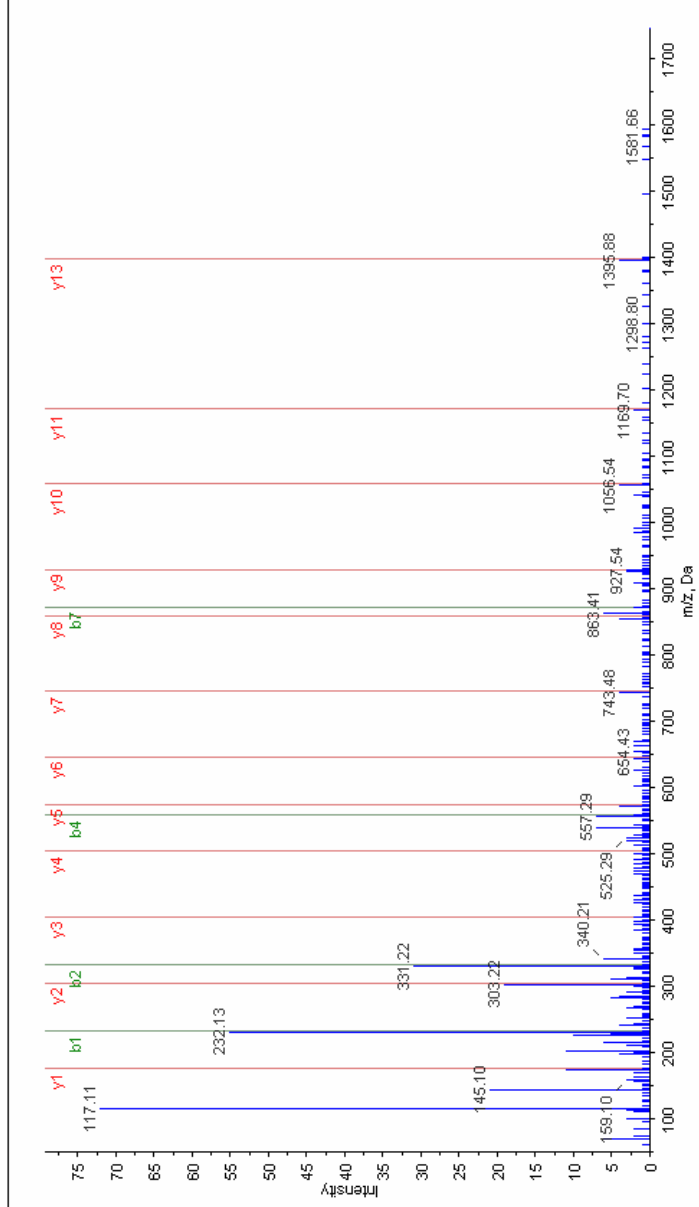

# Protein: SC05086, ActII [3 of 18]

Protein Quant

Protein ID

Spectra

Summary Statistics

## Spectrum List

| Spectrum      | Time   | Prec MW   | Prec m/z | Prec z | Best Sequence   | Modifications | Conf | Theor MW  | z | 115:114 | %Err | 115:114 |
|---------------|--------|-----------|----------|--------|-----------------|---------------|------|-----------|---|---------|------|---------|
| 20.1.1.1082.2 | 59.741 | 1724.9617 | 575.9945 | 3      | SYPEIEALVAAVVER | ITRAQ@N-term  | 99   | 1724.9794 | 3 |         |      | 116     |

## Peptide ID Hypotheses

| Conf | Sc | Prot ID | Sequence           | Modifications   | Theor MW  | Theor m/z | z | ΔMass   |
|------|----|---------|--------------------|-----------------|-----------|-----------|---|---------|
| 99   | 15 | 744     | SYPEIEALVAAVVER    | ITRAQ@N-term    | 1724.9794 | 576.0004  | 3 | -0.0177 |
| <1   | 5  | 211     | ISGGGWSGAGALRLGYAR | No ITRAQ@N-term | 1724.9645 | 575.9954  | 3 | -0.0028 |
| <1   | 8  |         | PAAYPLFIHGGEQR     | ITRAQ@N-term    | 1724.9331 | 575.9650  | 3 | 0.0286  |
| <1   | 8  |         | TALTIVAADALEVAPDR  | No ITRAQ@N-term | 1724.9308 | 575.9842  | 3 | 0.0309  |
| <1   | 7  |         | AISLGNPDVPTLAEER   | No ITRAQ@N-term | 1724.9243 | 575.9820  | 3 | 0.0374  |

## Precursor MS Region

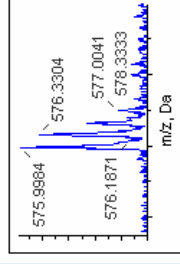

## Fragmentation Evidence for Peptide

ITR SYPEIEALVAAVVER

| Res | b         | y         |
|-----|-----------|-----------|
| S   | 232.1414  | 1725.9867 |
| V   | 331.2098  | 1494.8526 |
| P   | 428.2625  | 1385.7842 |
| E   | 557.3051  | 1298.7314 |
| I   | 670.3892  | 1189.6888 |
| E   | 799.4318  | 1056.6048 |
| A   | 870.4689  | 927.5622  |
| L   | 983.5530  | 856.5251  |
| V   | 1082.6214 | 743.4410  |
| A   | 1153.6585 | 644.3726  |
| A   | 1224.6956 | 573.3355  |
| V   | 1323.7640 | 502.2984  |
| V   | 1422.8324 | 403.2300  |
| E   | 1551.8750 | 304.1615  |
| R   | 1707.9761 | 175.1190  |

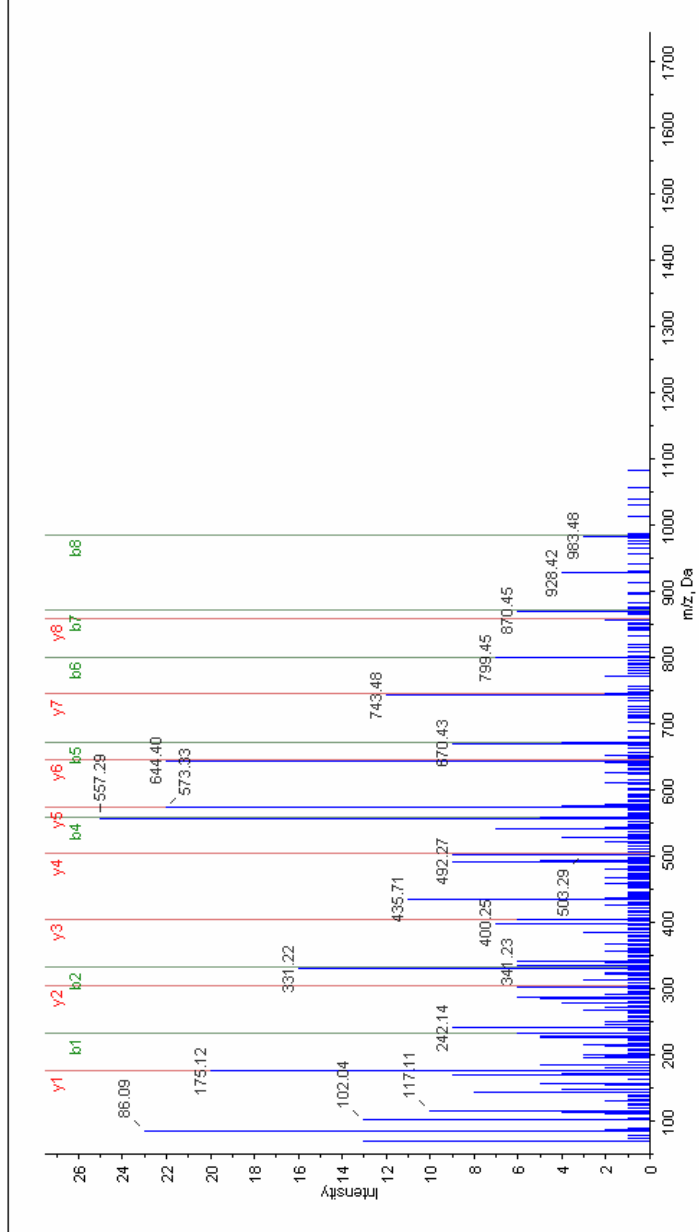

# Protein: SC05086, ActII [4 of 18]

Protein Quant

Protein ID

Spectra

Summary Statistics

## Spectrum List

| Spectrum      | Time   | Prec MW   | Prec m/z | Prec z | Best Sequence   | Modifications | Conf | Theor MW  | z | 115:114 | %Err | 115:114 |
|---------------|--------|-----------|----------|--------|-----------------|---------------|------|-----------|---|---------|------|---------|
| 20.1.1.1083.3 | 60.023 | 1724.9741 | 863.4944 | 2      | SYPEIEALVAAVVER | ITRAQ@N-term  | 99   | 1724.9794 | 2 | 115:114 |      | 116     |

## Peptide ID Hypotheses

| Conf | Sc | Prot ID | Sequence        | Modifications               | Theor MW  | Theor m/z | z | ΔMass   |
|------|----|---------|-----------------|-----------------------------|-----------|-----------|---|---------|
| 99   | 13 | 744     | SYPEIEALVAAVVER | ITRAQ@N-term                | 1724.9794 | 863.4970  | 2 | -0.0053 |
| <1   | 6  |         | LYARSNADLQRVIDR | No ITRAQ@N-term             | 1724.9645 | 863.4895  | 2 | 0.0096  |
| <1   | 6  |         | NYAKLVEPPRTDSR  | No ITRAQ@N-term, ITRAQ@C... | 1724.9655 | 863.4900  | 2 | 0.0086  |
| <1   | 6  |         | RLDGEVPPQELRR   | ITRAQ@N-term, Deamidatio... | 1724.9655 | 863.4900  | 2 | 0.0086  |
| <1   | 6  |         | VPPELSARVPAEQR  | ITRAQ@N-term, Deamidatio... | 1724.9179 | 863.4662  | 2 | 0.0563  |

## Precursor MS Region

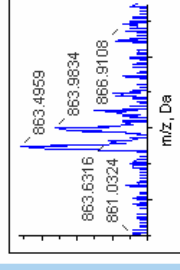

## Fragmentation Evidence for Peptide

ITR SYPEIEALVAAVVER

| Res | b         | y         |
|-----|-----------|-----------|
| S   | 232.1414  | 1725.9867 |
| V   | 331.2098  | 1494.8526 |
| P   | 428.2625  | 1395.7842 |
| E   | 557.3051  | 1298.7314 |
| I   | 670.3892  | 1189.6888 |
| E   | 799.4318  | 1056.6048 |
| A   | 870.4689  | 927.5622  |
| L   | 983.5530  | 856.5251  |
| V   | 1082.6214 | 743.4410  |
| A   | 1153.6585 | 644.3726  |
| A   | 1224.6956 | 573.3355  |
| V   | 1323.7640 | 502.2984  |
| V   | 1422.8324 | 403.2300  |
| E   | 1551.8750 | 304.1615  |
| R   | 1707.9761 | 175.1190  |

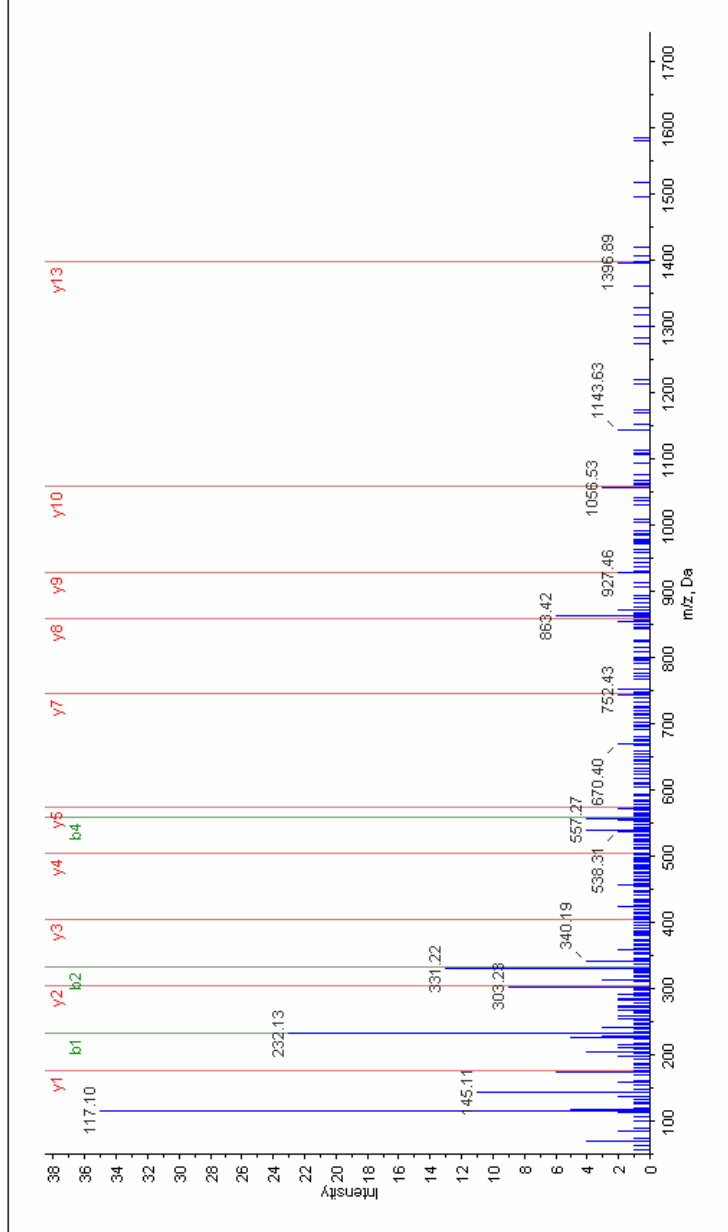

# Protein: SC05086, ActII [5 of 18]

Protein Quant

Protein ID

Spectra

Summary Statistics

## Spectrum List

| Spectrum      | Time   | Prec MW   | Prec m/z | Prec z | Best Sequence   | Modifications | Conf | Theor MW  | z | 115:114 | %Err | 115:114 |
|---------------|--------|-----------|----------|--------|-----------------|---------------|------|-----------|---|---------|------|---------|
| 21.1.1.1071.4 | 58.789 | 1724.9670 | 575.9963 | 3      | SYPEIEALVAAVVER | ITRAQ@N-term  | 99   | 1724.9795 | 3 |         |      | 116     |

## Peptide ID Hypotheses

| Conf | Sc | Prot N | Sequence          | Modifications              | Theor MW  | Theor m/z | z | ΔMass   |
|------|----|--------|-------------------|----------------------------|-----------|-----------|---|---------|
| 99   | 15 | 744    | SYPEIEALVAAVVER   | ITRAQ@N-term               | 1724.9795 | 576.0004  | 3 | -0.0125 |
| <1   | 9  |        | ALSLGMPDYPPTLAER  | No ITRAQ@N-term            | 1724.9244 | 575.9821  | 3 | 0.0426  |
| <1   | 8  |        | TAAGKPVAMPELVYR   | No ITRAQ@N-term, ITRAQ@... | 1725.0020 | 576.0079  | 3 | -0.0350 |
| <1   | 7  |        | TALTLVAADALEVAPDR | No ITRAQ@N-term            | 1724.9310 | 575.9842  | 3 | 0.0361  |
| <1   | 6  |        | ASTPGSYTFILPATR   | ITRAQ@N-term               | 1724.9220 | 575.9813  | 3 | 0.0450  |

## Precursor MS Region

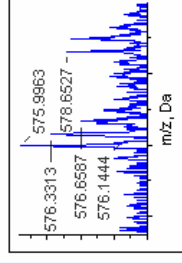

## Fragmentation Evidence for Peptide

ITR | SYPEIEALVAAVVER

| Res | b         | y         |
|-----|-----------|-----------|
| S   | 232.1414  | 1725.9867 |
| V   | 331.2098  | 1494.8526 |
| P   | 428.2625  | 1395.7842 |
| E   | 557.3051  | 1298.7314 |
| I   | 670.3892  | 1169.6868 |
| E   | 799.4318  | 1056.6048 |
| A   | 870.4689  | 927.5622  |
| L   | 983.5530  | 858.5251  |
| V   | 1082.6214 | 743.4410  |
| A   | 1153.6585 | 644.3726  |
| A   | 1224.6956 | 573.3355  |
| V   | 1323.7640 | 502.2984  |
| V   | 1422.8324 | 403.2300  |
| E   | 1551.8750 | 304.1615  |
| R   | 1707.9761 | 175.1190  |

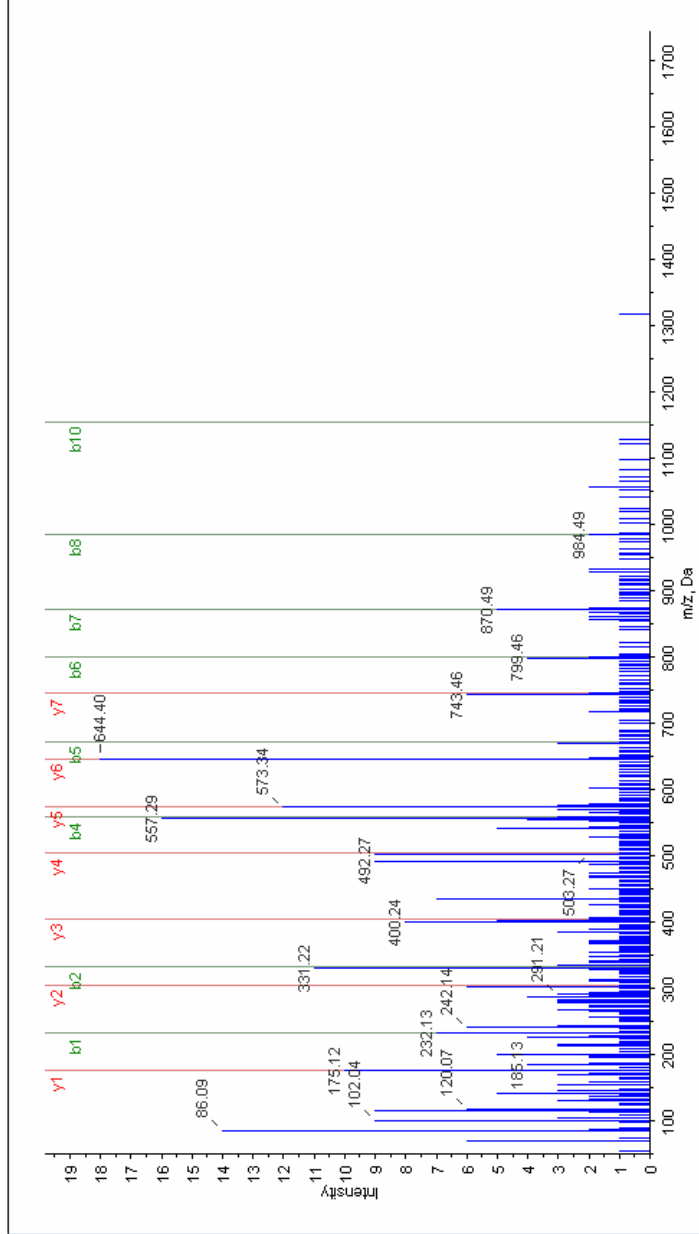

Protein: SC05086, ActII [6 of 18]

Protein Quant

Protein ID

Spectra

Summary Statistics

Spectrum List

| Spectrum      | Time   | Prec MW   | Prec m/z | Prec z | Best Sequence   | Modifications | Conf | Theor MW  | z | 115:114 | %Err | 115:114 |
|---------------|--------|-----------|----------|--------|-----------------|---------------|------|-----------|---|---------|------|---------|
| 22.1.1.1100.5 | 59.732 | 1724.9866 | 576.0029 | 3      | SYPEIEALVAAVVER | ITRAQ@N-term  | 99   | 1724.9794 | 3 |         |      | 116     |

Peptide ID Hypotheses

| Conf | Sc | Prot N | Sequence           | Modifications               | Theor MW  | Theor m/z | z | ΔMass   |
|------|----|--------|--------------------|-----------------------------|-----------|-----------|---|---------|
| 99   | 14 | 744    | SYPEIEALVAAVVER    | ITRAQ@N-term                | 1724.9794 | 576.0004  | 3 | 0.0074  |
| <1   | 7  |        | QLADGYRVAAGEALL    | ITRAQ@N-term                | 1724.9907 | 576.0041  | 3 | -0.0038 |
| <1   | 7  |        | RTGLMRYVPLLLRR     | No ITRAQ@N-term, Deamid...  | 1724.9872 | 576.0030  | 3 | -0.0004 |
| <1   | 6  |        | TALTLVAADALEVA PDR | No ITRAQ@N-term             | 1724.9309 | 575.9842  | 3 | 0.0560  |
| <1   | 6  |        | VPEELISARVPAEQR    | ITRAQ@N-term, Deamidatio... | 1724.9179 | 575.9799  | 3 | 0.0689  |

Precursor MS Region

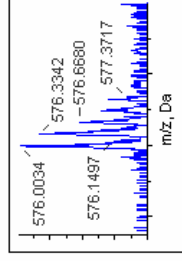

Fragmentation Evidence for Peptide

ITR | SYPEIEALVAAVVER

| Res | b         | y         |
|-----|-----------|-----------|
| S   | 232.1414  | 1725.9867 |
| V   | 331.2098  | 1494.8526 |
| P   | 428.2625  | 1395.7842 |
| E   | 557.3051  | 1298.7314 |
| I   | 670.3892  | 1169.6868 |
| E   | 799.4318  | 1056.6048 |
| A   | 870.4689  | 927.5622  |
| L   | 983.5530  | 858.5251  |
| V   | 1082.6214 | 743.4410  |
| A   | 1153.6585 | 644.3726  |
| A   | 1224.6956 | 573.3355  |
| V   | 1323.7640 | 502.2984  |
| V   | 1422.8324 | 403.2300  |
| E   | 1551.8750 | 304.1615  |
| R   | 1707.9761 | 175.1190  |

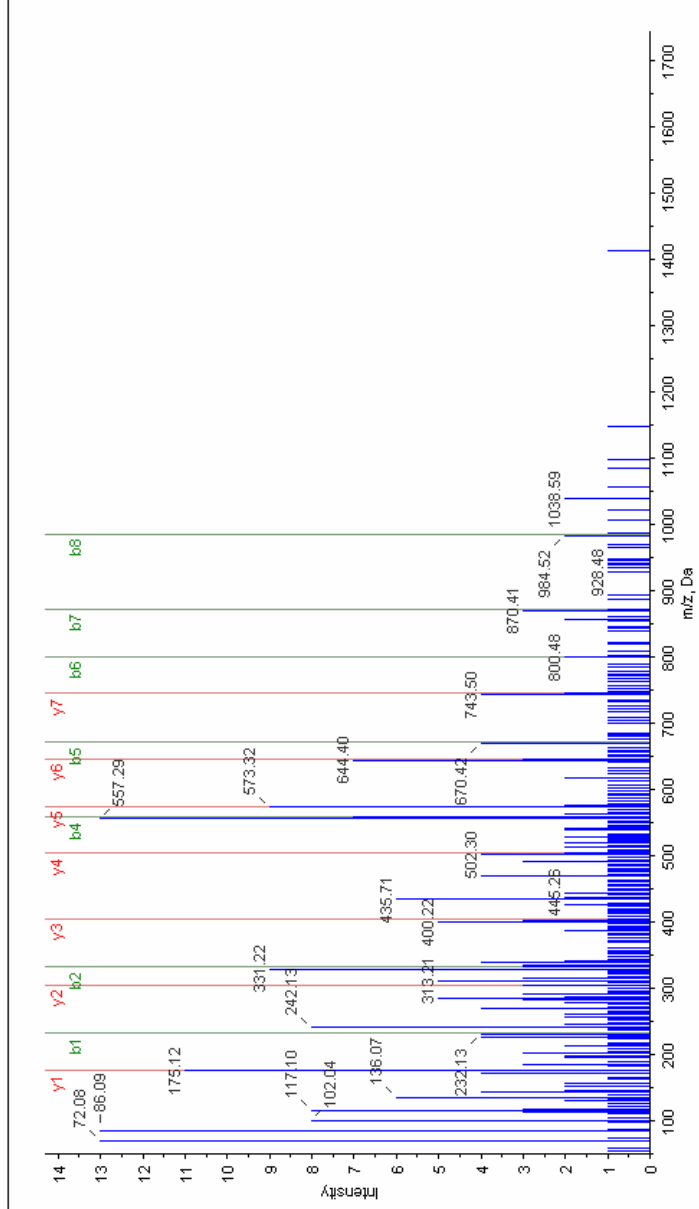

# Protein: SC05086, ActII [7 of 18]

Protein Quant

Protein ID

Spectra

Summary Statistics

## Spectrum List

| Spectrum      | Time   | Prec MW   | Prec m/z | Prec z | Best Sequence   | Modifications | Conf | Theor MW  | z | 115:114 | %Err  | 115:114 |
|---------------|--------|-----------|----------|--------|-----------------|---------------|------|-----------|---|---------|-------|---------|
| 23.1.1.1108.2 | 59.630 | 1724.9532 | 575.9917 | 3      | SYPEIEALVAAVVER | ITRAQ@N-term  | 99   | 1724.9795 | 3 | 0.7584  | 31.11 | 116     |

## Peptide ID Hypotheses

| Conf | Sc | Prot ID | Sequence          | Modifications               | Theor MW  | Theor m/z | z | ΔMass   |
|------|----|---------|-------------------|-----------------------------|-----------|-----------|---|---------|
| 99   | 14 | 744     | SYPEIEALVAAVVER   | ITRAQ@N-term                | 1724.9795 | 576.0004  | 3 | -0.0262 |
| <1   | 8  | 211     | ISGGVSGAGALRLGYAR | No ITRAQ@N-term             | 1724.9646 | 575.9955  | 3 | -0.0113 |
| <1   | 6  |         | EQQLIADQARLRER    | No ITRAQ@N-term             | 1724.9282 | 575.9834  | 3 | 0.0250  |
| <1   | 6  |         | RAAGAVVAVGQVDGRR  | ITRAQ@N-term                | 1724.9680 | 576.0033  | 3 | -0.0348 |
| <1   | 6  |         | VPEELLSARVPAEQR   | ITRAQ@N-term, Deamidatio... | 1724.9179 | 575.9799  | 3 | 0.0363  |

## Precursor MS Region

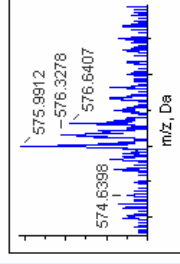

## Fragmentation Evidence for Peptide

ITR SYPEIEALVAAVVER

| Res | b         | y         |
|-----|-----------|-----------|
| S   | 232.1414  | 1725.9867 |
| V   | 331.2098  | 1494.8526 |
| P   | 428.2625  | 1385.7842 |
| E   | 557.3051  | 1298.7314 |
| I   | 670.3892  | 1189.6888 |
| E   | 799.4318  | 1056.6048 |
| A   | 870.4689  | 927.5622  |
| L   | 983.5530  | 866.5251  |
| V   | 1082.6214 | 743.4410  |
| A   | 1153.6585 | 644.3726  |
| A   | 1224.6956 | 573.3355  |
| V   | 1323.7640 | 502.2984  |
| V   | 1422.8324 | 403.2300  |
| E   | 1551.8750 | 304.1615  |
| R   | 1707.9761 | 175.1190  |

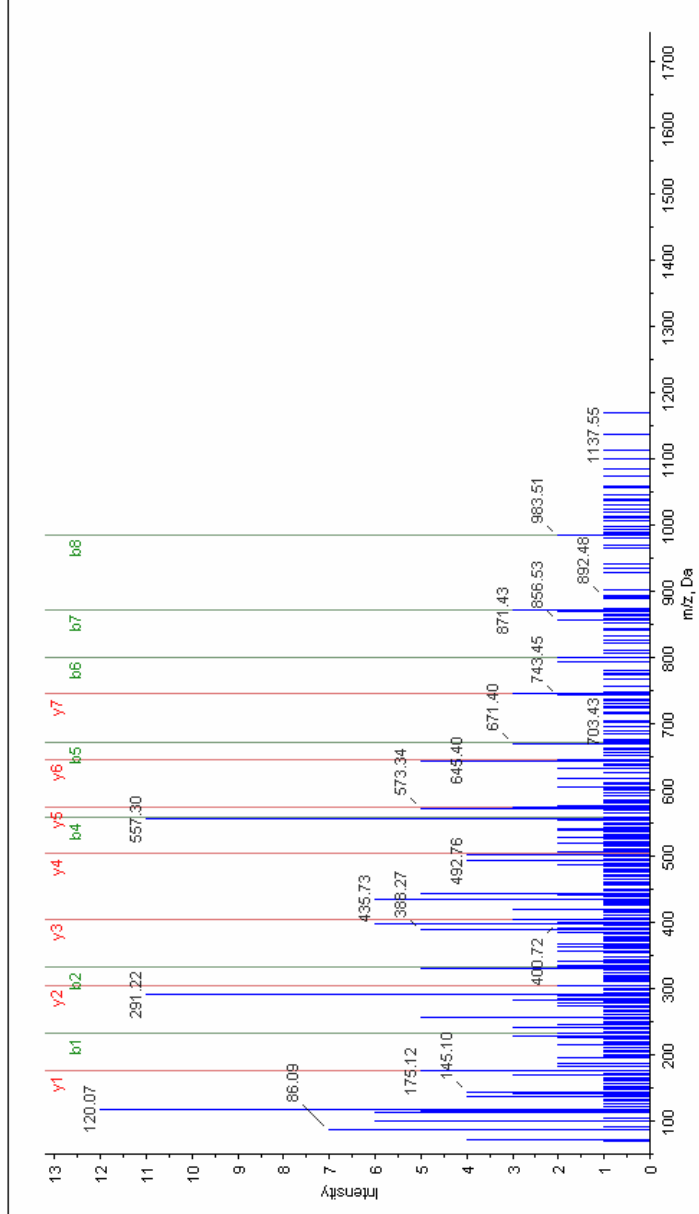

# Protein: SC05086, ActII [8 of 18]

Protein Quant

Protein ID

Spectra

Summary Statistics

## Spectrum List

| Spectrum    | Time   | Prec MW   | Prec m/z | Prec z | Best Sequence   | Modifications | Conf | Theor MW  | z | 115:114 | %Err | 115:114 |
|-------------|--------|-----------|----------|--------|-----------------|---------------|------|-----------|---|---------|------|---------|
| 3.1.1.112.2 | 59.778 | 1724.9719 | 575.9979 | 3      | SYFEIEALVAAVVER | ITRAQ@N-term  | 99   | 1724.9793 | 3 |         |      | 116     |

## Peptide ID Hypotheses

| Conf | Sc | Prot N | Sequence             | Modifications               | Theor MW  | Theor m/z | z | ΔMass   |
|------|----|--------|----------------------|-----------------------------|-----------|-----------|---|---------|
| 99   | 16 | 744    | SYFEIEALVAAVVER      | ITRAQ@N-term                | 1724.9793 | 576.0004  | 3 | -0.0074 |
| <1   | 7  | 211    | ISGGGYSGGAGALRLGVAR  | No ITRAQ@N-term             | 1724.9645 | 575.9954  | 3 | 0.0074  |
| <1   | 9  |        | TA.LT.LVAADALEVA.PDR | No ITRAQ@N-term             | 1724.9308 | 575.9842  | 3 | 0.0411  |
| <1   | 8  |        | PAAYVPLPIGNGEOR      | ITRAQ@N-term                | 1724.9331 | 575.9850  | 3 | 0.0389  |
| <1   | 7  |        | GYLAENVRVLK.PGGR     | No ITRAQ@N-term, ITRAQ@C... | 1725.0204 | 576.0141  | 3 | -0.0485 |

## Precursor MS Region

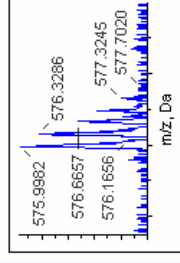

## Fragmentation Evidence for Peptide

ITR | SYFEIEALVAAVVER

| Res | b         | y         |
|-----|-----------|-----------|
| S   | 232.1414  | 1725.9867 |
| V   | 331.2098  | 1494.8526 |
| P   | 428.2625  | 1395.7842 |
| E   | 557.3051  | 1298.7314 |
| I   | 670.3892  | 1169.6868 |
| E   | 799.4318  | 1056.6048 |
| A   | 870.4689  | 927.5622  |
| L   | 983.5530  | 856.5251  |
| V   | 1082.6214 | 743.4410  |
| A   | 1153.6585 | 644.3726  |
| A   | 1224.6956 | 573.3355  |
| V   | 1323.7640 | 502.2984  |
| V   | 1422.8324 | 403.2300  |
| E   | 1551.8750 | 304.1615  |
| R   | 1707.9761 | 175.1190  |

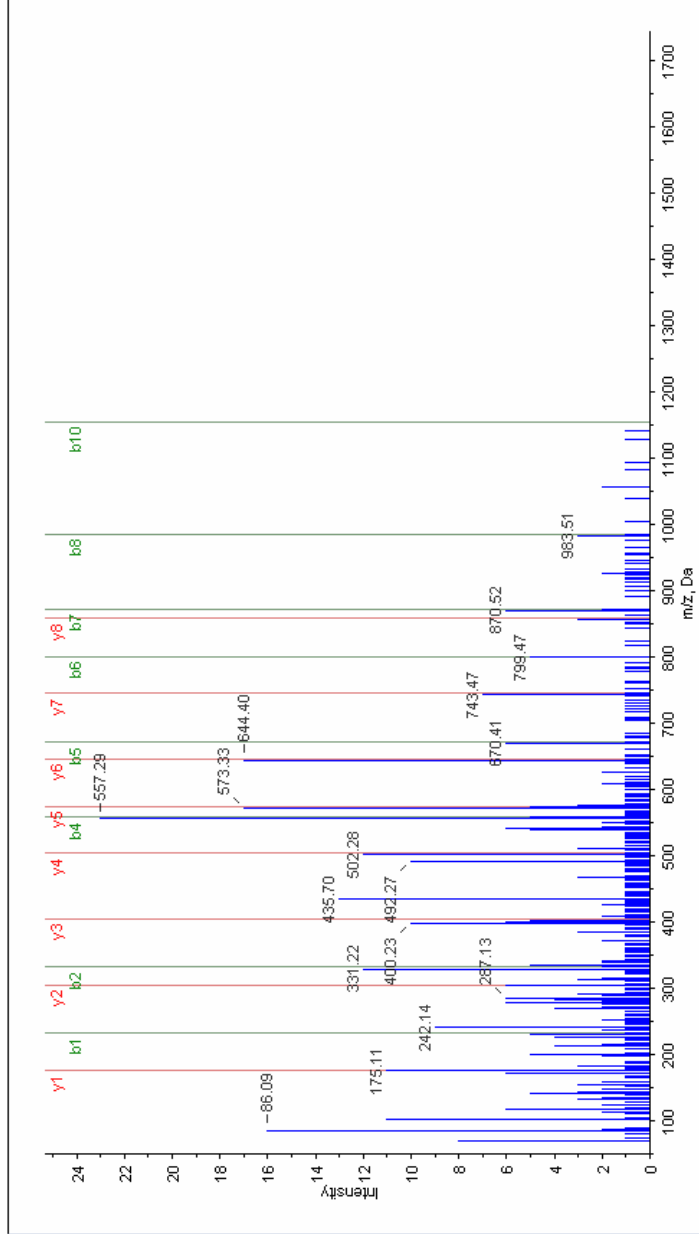

# Protein: SC05086, ActII [9 of 18]

Protein Quant

Protein ID

Spectra

Summary Statistics

## Spectrum List

| Spectrum      | Time   | Prec MW   | Prec m/z | Prec z | Best Sequence   | Modifications | Conf | Theor MW  | z | 115:114 | %Err | 115:114 |
|---------------|--------|-----------|----------|--------|-----------------|---------------|------|-----------|---|---------|------|---------|
| 17.1.1.1639.2 | 59.725 | 1724.9780 | 575.9899 | 3      | SYPEIEALVAAVVER | ITRAQ@N-term  | 99   | 1724.9795 | 3 |         |      | 116     |

## Peptide ID Hypotheses

| Conf | Sc | Prot ID | Sequence          | Modifications              | Theor MW  | Theor m/z | z | ΔMass   |
|------|----|---------|-------------------|----------------------------|-----------|-----------|---|---------|
| 99   | 14 | 744     | SYPEIEALVAAVVER   | ITRAQ@N-term               | 1724.9795 | 576.0004  | 3 | -0.0015 |
| <1   | 7  |         | AI.SLGNPDVPTFLAER | No ITRAQ@N-term            | 1724.9244 | 575.9821  | 3 | 0.0536  |
| <1   | 7  |         | PAAYVPLFIGHGEQR   | ITRAQ@N-term               | 1724.9333 | 575.9850  | 3 | 0.0448  |
| <1   | 7  |         | TALTIVAADALEVAPDR | No ITRAQ@N-term            | 1724.9310 | 575.9842  | 3 | 0.0471  |
| <1   | 6  |         | RKLTDGPAPAE PSSR  | No ITRAQ@N-term, ITRAQ@... | 1724.9292 | 575.9837  | 3 | 0.0488  |

## Precursor MS Region

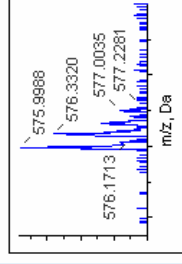

## Fragmentation Evidence for Peptide

ITR SYPEIEALVAAVVER

| Res | b         | y         |
|-----|-----------|-----------|
| S   | 232.1414  | 1725.9867 |
| V   | 331.2098  | 1494.8526 |
| P   | 428.2625  | 1385.7842 |
| E   | 557.3051  | 1298.7314 |
| I   | 670.3892  | 1189.6888 |
| E   | 799.4318  | 1056.6048 |
| A   | 870.4689  | 927.5622  |
| L   | 983.5530  | 866.5251  |
| V   | 1082.6214 | 743.4410  |
| A   | 1153.6585 | 644.3726  |
| A   | 1224.6956 | 573.3355  |
| V   | 1323.7640 | 502.2984  |
| V   | 1422.8324 | 403.2300  |
| E   | 1551.8750 | 304.1615  |
| R   | 1707.9761 | 175.1190  |

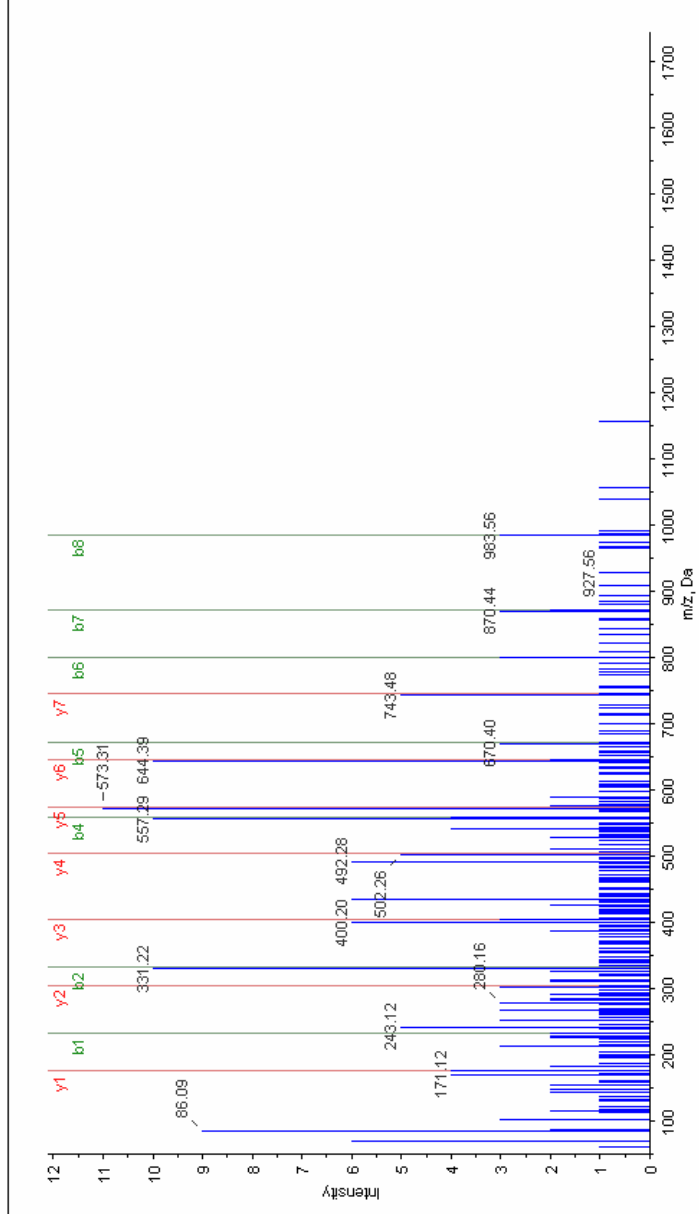



# Protein: SC05086, ActII [10 of 18]

Protein Quant

Protein ID

Spectra

Summary Statistics

## Spectrum List

| Spectrum      | Time   | Prec MW   | Prec m/z | Prec z | Best Sequence   | Modifications | Conf | Theor MW  | z | 115:114 | %Err | 115:114 |
|---------------|--------|-----------|----------|--------|-----------------|---------------|------|-----------|---|---------|------|---------|
| 20.1.1.1087.2 | 60.894 | 1724.9879 | 576.0032 | 3      | SYPEIEALVAAVVER | ITRAQ@N-term  | 99   | 1724.9794 | 3 |         |      | 116     |

## Peptide ID Hypotheses

| Conf | Sc | Prot N | Sequence         | Modifications              | Theor MW  | Theor m/z | z | ΔMass   |
|------|----|--------|------------------|----------------------------|-----------|-----------|---|---------|
| 99   | 14 | 744    | SYPEIEALVAAVVER  | ITRAQ@N-term               | 1724.9794 | 576.0004  | 3 | 0.0085  |
| <1   | 8  |        | ATSLGMPDPPTPLAER | No ITRAQ@N-term            | 1724.9243 | 575.9820  | 3 | 0.0636  |
| <1   | 7  |        | PAAYPLPIGNGEQR   | ITRAQ@N-term               | 1724.9332 | 575.9850  | 3 | 0.0548  |
| <1   | 6  |        | GYLAENVRYLKPQGR  | No ITRAQ@N-term, ITRAQ@... | 1725.0205 | 576.0141  | 3 | -0.0325 |
| <1   | 6  |        | TALLVAADALEVAPDR | No ITRAQ@N-term            | 1724.9309 | 575.9842  | 3 | 0.0571  |

## Precursor MS Region

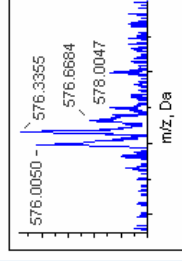

## Fragmentation Evidence for Peptide

ITR | SYPEIEALVAAVVER

| Res | b         | y         |
|-----|-----------|-----------|
| S   | 232.1414  | 1725.9867 |
| V   | 331.2098  | 1494.8526 |
| P   | 428.2625  | 1395.7842 |
| E   | 557.3051  | 1298.7314 |
| I   | 670.3892  | 1169.6868 |
| E   | 799.4318  | 1056.6048 |
| A   | 870.4689  | 927.5622  |
| L   | 983.5530  | 858.5251  |
| V   | 1082.6214 | 743.4410  |
| A   | 1153.6585 | 644.3726  |
| A   | 1224.6956 | 573.3355  |
| V   | 1323.7640 | 502.2984  |
| V   | 1422.8324 | 403.2300  |
| E   | 1551.8750 | 304.1615  |
| R   | 1707.9761 | 175.1190  |

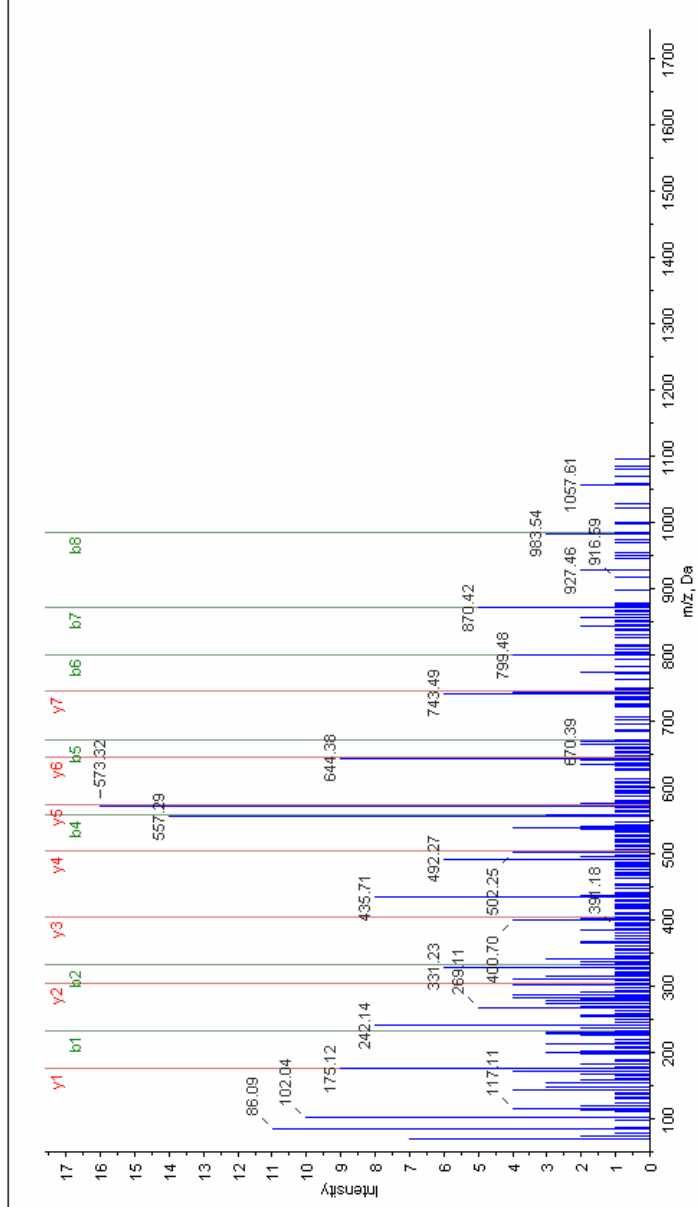

# Protein: SC05086, ActII [11 of 18]

Protein Quant

Protein ID

Spectra

Summary Statistics

## Spectrum List

| Spectrum      | Time   | Prec MW   | Prec m/z | Prec z | Best Sequence   | Modifications | Conf | Theor MW  | z | 115:114 | %Err | 115:114 |
|---------------|--------|-----------|----------|--------|-----------------|---------------|------|-----------|---|---------|------|---------|
| 20.1.1.1102.2 | 62.047 | 1724.9843 | 576.0020 | 3      | SYPEIEALVAAVVER | ITRAQ@N-term  | 99   | 1724.9794 | 3 |         |      | 116     |

## Peptide ID Hypotheses

| Conf | Sc | Prot N | Sequence            | Modifications              | Theor MW  | Theor m/z | z | ΔMass   |
|------|----|--------|---------------------|----------------------------|-----------|-----------|---|---------|
| 99   | 13 | 744    | SYPEIEALVAAVVER     | ITRAQ@N-term               | 1724.9794 | 576.0004  | 3 | 0.0048  |
| <1   | 6  | 211    | ISGGGYSGGAGALRLGVAR | No ITRAQ@N-term            | 1724.9646 | 575.9955  | 3 | 0.0197  |
| <1   | 7  |        | TALTLVAADALEVA PDR  | No ITRAQ@N-term            | 1724.9309 | 575.9842  | 3 | 0.0534  |
| <1   | 6  |        | ASTPGSYTFIL PATR    | ITRAQ@N-term               | 1724.9219 | 575.9812  | 3 | 0.0623  |
| <1   | 6  |        | GYLAEMVRVLPK PGR    | No ITRAQ@N-term, ITRAQ@... | 1725.0205 | 576.0141  | 3 | -0.0363 |

## Precursor MS Region

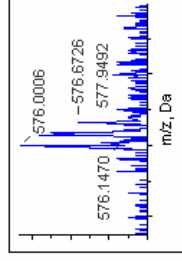

## Fragmentation Evidence for Peptide

ITR | SYPEIEALVAAVVER

| Res | b         | y         |
|-----|-----------|-----------|
| S   | 232.1414  | 1725.9867 |
| V   | 331.2098  | 1494.8526 |
| P   | 428.2625  | 1395.7842 |
| E   | 557.3051  | 1298.7314 |
| I   | 670.3892  | 1169.6868 |
| E   | 799.4318  | 1056.6048 |
| A   | 870.4689  | 927.5622  |
| L   | 983.5530  | 858.5251  |
| V   | 1082.6214 | 743.4410  |
| A   | 1153.6585 | 644.3726  |
| A   | 1224.6956 | 573.3355  |
| V   | 1323.7640 | 502.2984  |
| V   | 1422.8324 | 403.2300  |
| E   | 1551.8750 | 304.1615  |
| R   | 1707.9761 | 175.1190  |

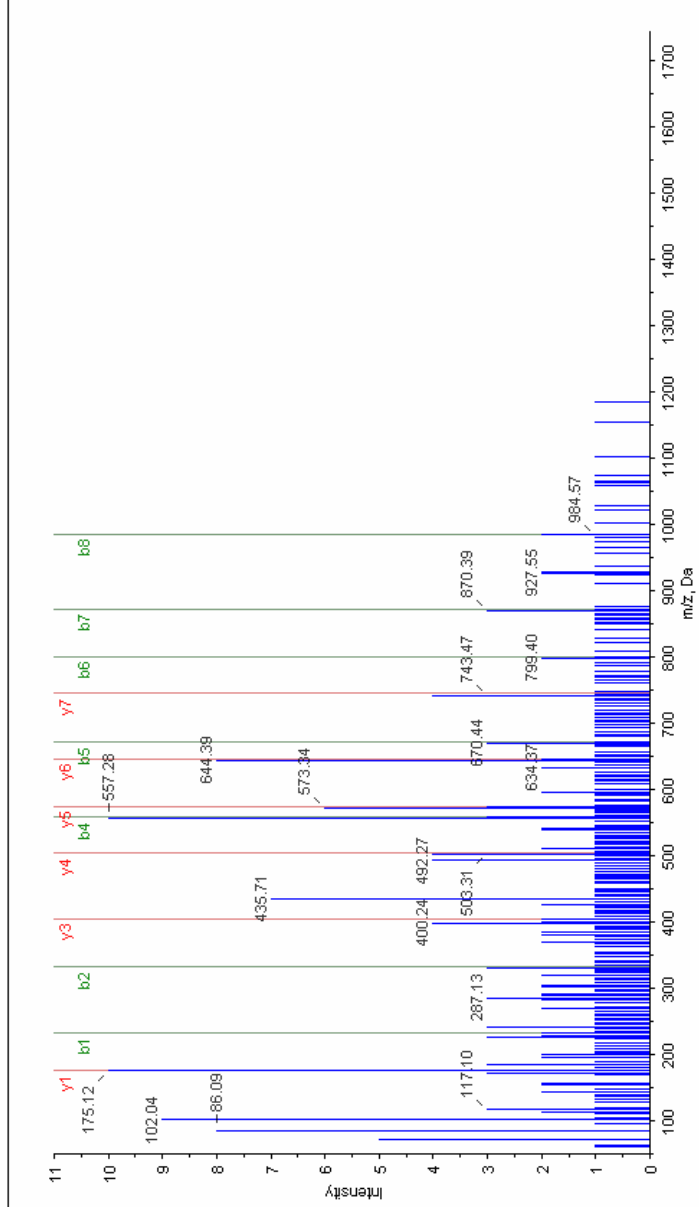

# Protein: SC05086, ActII [12 of 18]

Protein Quant

Protein ID

Spectra

Summary Statistics

## Spectrum List

| Spectrum      | Time   | Prec MW   | Prec m/z | Prec z | Best Sequence   | Modifications | Conf | Theor MW  | z | 115:114 | %Err | 115:114 |
|---------------|--------|-----------|----------|--------|-----------------|---------------|------|-----------|---|---------|------|---------|
| 20.1.1.1119.3 | 65.915 | 1724.9785 | 576.0001 | 3      | SYPEIEALVAAVVER | ITRAQ@N-term  | 99   | 1724.9794 | 3 |         |      | 116     |

## Peptide ID Hypotheses

| Conf | Sc | Prot ID | Sequence          | Modifications               | Theor MW  | Theor m/z | z | ΔMass   |
|------|----|---------|-------------------|-----------------------------|-----------|-----------|---|---------|
| 99   | 13 | 744     | SYPEIEALVAAVVER   | ITRAQ@N-term                | 1724.9794 | 576.0004  | 3 | -0.0009 |
| <1   | 4  | 211     | ISGGVSGAGAIRLGYAR | No ITRAQ@N-term             | 1724.9645 | 575.9954  | 3 | 0.0140  |
| <1   | 6  |         | CYLAEMVRYLKPGR    | No ITRAQ@N-term, ITRAQ@...  | 1725.0205 | 576.0141  | 3 | -0.0420 |
| <1   | 6  |         | TALTIVAADALEVAPDR | No ITRAQ@N-term             | 1724.9308 | 575.9842  | 3 | 0.0477  |
| <1   | 6  |         | VPPEELSRVPAEQR    | ITRAQ@N-term, Deamidatio... | 1724.9178 | 575.9799  | 3 | 0.0607  |

## Precursor MS Region

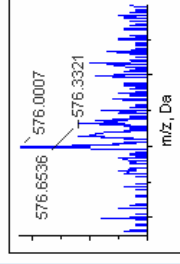

## Fragmentation Evidence for Peptide

ITR SYPEIEALVAAVVER

| Res | b         | y         |
|-----|-----------|-----------|
| S   | 232.1414  | 1725.9867 |
| V   | 331.2098  | 1494.8526 |
| P   | 428.2625  | 1385.7842 |
| E   | 557.3051  | 1298.7314 |
| I   | 670.3892  | 1189.6888 |
| E   | 798.4318  | 1056.6048 |
| A   | 870.4689  | 927.5622  |
| L   | 983.5530  | 866.5251  |
| V   | 1082.6214 | 743.4410  |
| A   | 1153.6585 | 644.3726  |
| A   | 1224.6956 | 573.3355  |
| V   | 1323.7640 | 502.2984  |
| V   | 1422.8324 | 403.2300  |
| E   | 1551.8750 | 304.1615  |
| R   | 1707.9761 | 175.1190  |

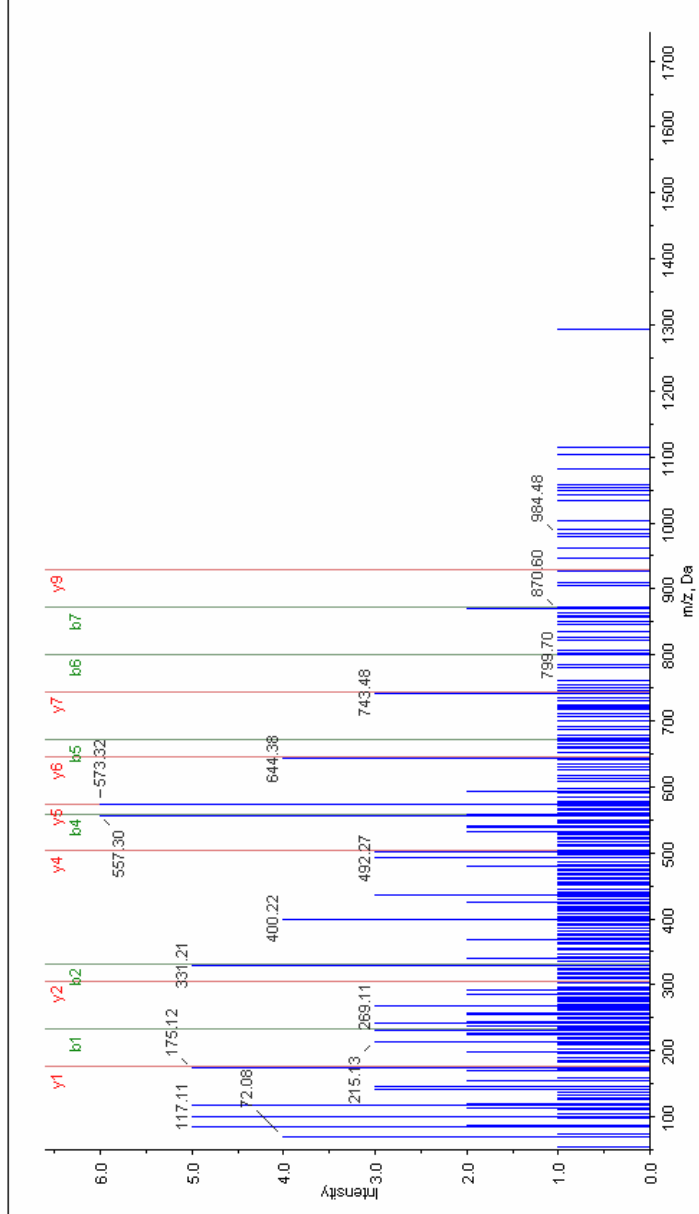

# Protein: SC05086, ActII [13 of 18]

Protein Quant

Protein ID

Spectra

Summary Statistics

## Spectrum List

| Spectrum      | Time   | Prec MW   | Prec m/z | Prec z | Best Sequence   | Modifications | Conf | Theor MW  | z | 115:114 | %Err 115:114 | 116 |
|---------------|--------|-----------|----------|--------|-----------------|---------------|------|-----------|---|---------|--------------|-----|
| 21.1.1.1076.2 | 59.639 | 1724.9785 | 576.0001 | 3      | SYPEIEALVAAVVER | ITRAQ@N-term  | 99   | 1724.9795 | 3 |         |              |     |

## Peptide ID Hypotheses

| Conf | Sc | Prot ID | Sequence          | Modifications   | Theor MW  | Theor m/z | z | ΔMass   |
|------|----|---------|-------------------|-----------------|-----------|-----------|---|---------|
| 99   | 15 | 744     | SYPEIEALVAAVVER   | ITRAQ@N-term    | 1724.9795 | 576.0004  | 3 | -0.0010 |
| <1   | 6  |         | ARRSYVAVVAALDRV   | ITRAQ@N-term    | 1725.0496 | 576.0238  | 3 | -0.0710 |
| <1   | 6  |         | PTGVEVYADLSEGIP   | ITRAQ@N-term    | 1724.9319 | 575.9846  | 3 | 0.0467  |
| <1   | 6  |         | TALTIVAADALEVAPDR | No ITRAQ@N-term | 1724.9309 | 575.9842  | 3 | 0.0476  |
| <1   | 5  |         | RATLNRLFLFPGPAR   | ITRAQ@N-term    | 1725.0284 | 576.0188  | 3 | -0.0499 |

## Precursor MS Region

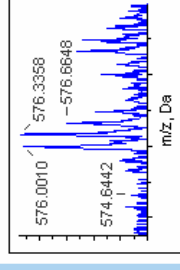

## Fragmentation Evidence for Peptide

ITR SYPEIEALVAAVVER

| Res | b         | y         |
|-----|-----------|-----------|
| S   | 232.1414  | 1725.9867 |
| V   | 331.2098  | 1494.8526 |
| P   | 428.2625  | 1385.7842 |
| E   | 557.3051  | 1298.7314 |
| I   | 670.3892  | 1189.6888 |
| E   | 799.4318  | 1056.6048 |
| A   | 870.4689  | 927.5622  |
| L   | 983.5530  | 866.5251  |
| V   | 1082.6214 | 743.4410  |
| A   | 1153.6585 | 644.3726  |
| A   | 1224.6956 | 573.3355  |
| V   | 1323.7640 | 502.2984  |
| V   | 1422.8324 | 403.2300  |
| E   | 1551.8750 | 304.1615  |
| R   | 1707.9761 | 175.1190  |

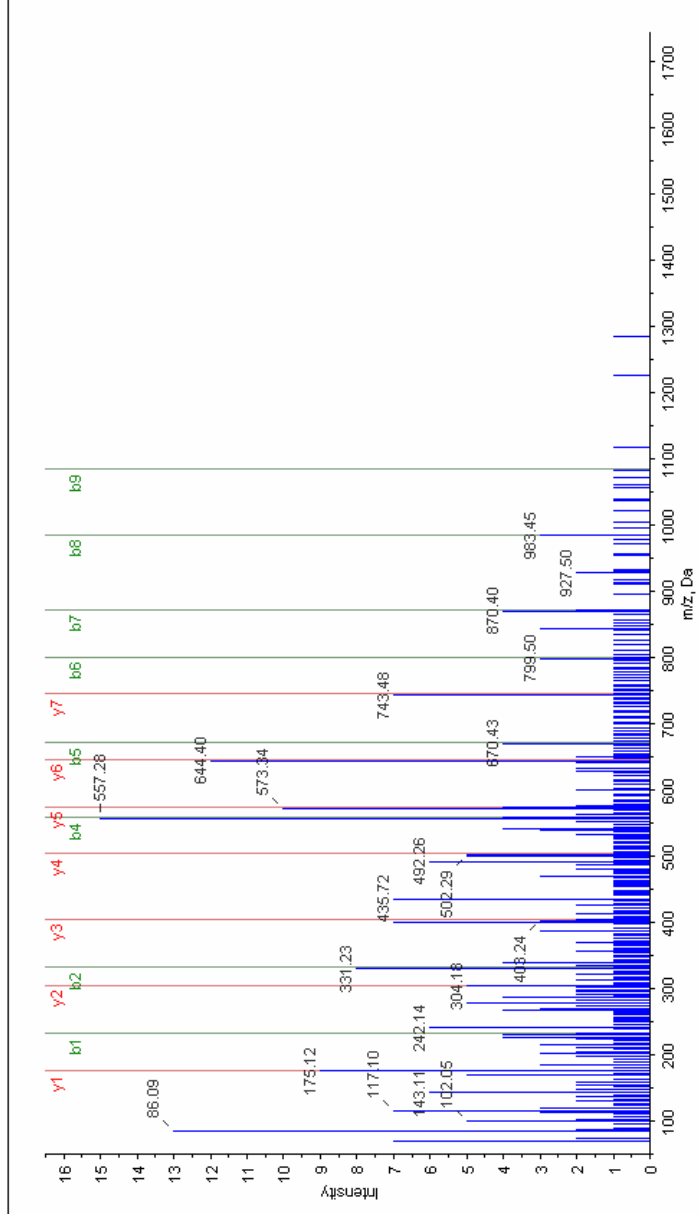

# Protein: SC05086, ActII [14 of 18]

Protein Quant

Protein ID

Spectra

Summary Statistics

## Spectrum List

| Spectrum      | Time   | Prec MW   | Prec m/z | Prec z | Best Sequence   | Modifications | Conf | Theor MW  | z | 115:114 | %Err | 115:114 |
|---------------|--------|-----------|----------|--------|-----------------|---------------|------|-----------|---|---------|------|---------|
| 22.1.1.1101.4 | 59.911 | 1724.9763 | 575.9994 | 3      | SYPEIEALVAAVVER | ITRAQ@N-term  | 99   | 1724.9794 | 3 |         |      | 116     |

## Peptide ID Hypotheses

| Conf | Sc | Prot N | Sequence            | Modifications   | Theor MW  | Theor m/z | z | ΔMass   |
|------|----|--------|---------------------|-----------------|-----------|-----------|---|---------|
| 99   | 15 | 744    | SYPEIEALVAAVVER     | ITRAQ@N-term    | 1724.9794 | 576.0004  | 3 | -0.0030 |
| <1   | 6  | 211    | ISGGGYSGGAGALRLGVAR | No ITRAQ@N-term | 1724.9645 | 575.9954  | 3 | 0.0118  |
| <1   | 8  |        | AI SLGMPPDYPTRLAER  | No ITRAQ@N-term | 1724.9243 | 575.9820  | 3 | 0.0521  |
| <1   | 7  |        | QLADGVRVYAAQEALL    | ITRAQ@N-term    | 1724.9906 | 576.0041  | 3 | -0.0143 |
| <1   | 6  |        | APSVFTQVGLGAVIPGR   | No ITRAQ@N-term | 1724.9573 | 575.9930  | 3 | 0.0190  |

## Precursor MS Region

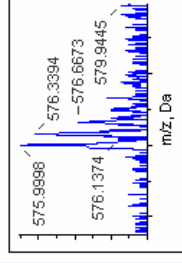

## Fragmentation Evidence for Peptide

ITR | SYPEIEALVAAVVER

| Res | b         | y         |
|-----|-----------|-----------|
| S   | 232.1414  | 1725.9867 |
| V   | 331.2098  | 1494.8526 |
| P   | 428.2625  | 1395.7842 |
| E   | 557.3051  | 1298.7314 |
| I   | 670.3892  | 1169.6868 |
| E   | 799.4318  | 1056.6048 |
| A   | 870.4689  | 927.5622  |
| L   | 983.5530  | 858.5251  |
| V   | 1082.6214 | 743.4410  |
| A   | 1153.6585 | 644.3726  |
| A   | 1224.6956 | 573.3355  |
| V   | 1323.7640 | 502.2984  |
| V   | 1422.8324 | 403.2300  |
| E   | 1551.8750 | 304.1615  |
| R   | 1707.9761 | 175.1190  |

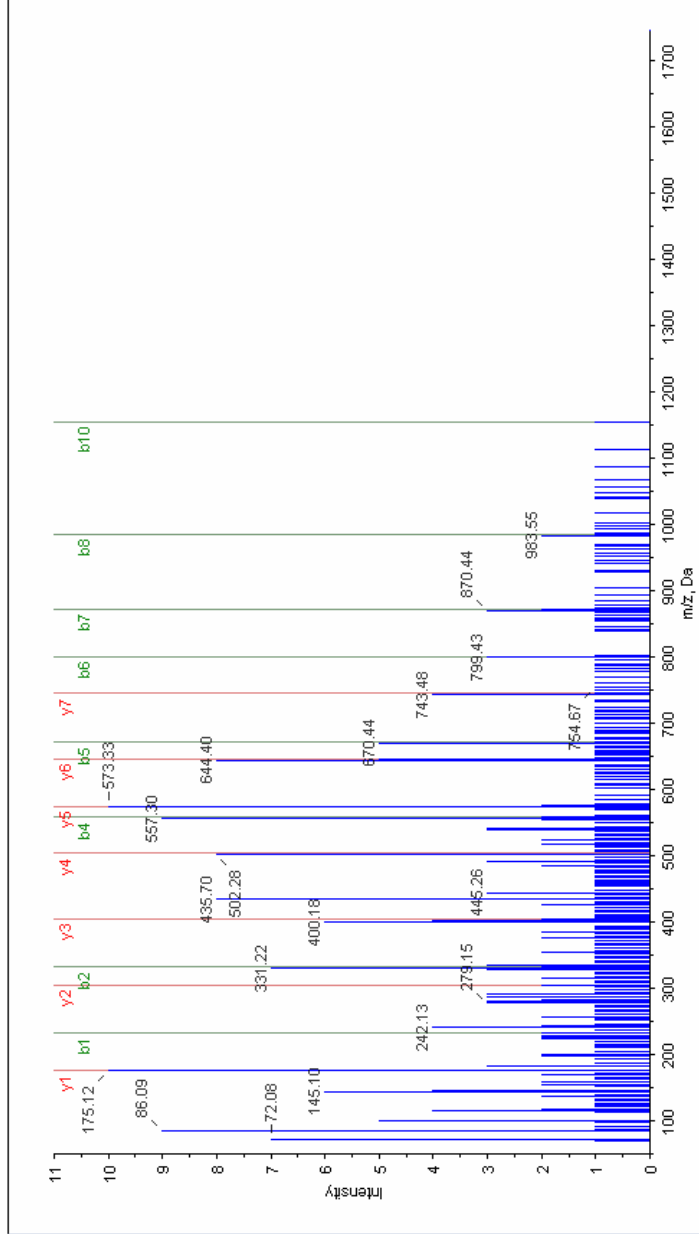

# Protein: SC05086, ActII [15 of 18]

Protein Quant

Protein ID

Spectra

Summary Statistics

## Spectrum List

| Spectrum     | Time   | Prec MW   | Prec m/z | Prec z | Best Sequence   | Modifications | Conf | Theor MW  | z | 115:114 | %Err  | 115:114 |
|--------------|--------|-----------|----------|--------|-----------------|---------------|------|-----------|---|---------|-------|---------|
| 5.1.1.2158.3 | 51.444 | 1724.9735 | 863.4940 | 2      | SYPEIEALVAAVVER | ITRAQ@N-term  | 99   | 1724.9795 | 2 | 0.5154  | 15.32 | 116     |

## Peptide ID Hypotheses

| Conf | Sc | Prot ID | Sequence           | Modifications               | Theor MW  | Theor m/z | z | ΔMass   |
|------|----|---------|--------------------|-----------------------------|-----------|-----------|---|---------|
| 99   | 15 | 411     | SYPEIEALVAAVVER    | ITRAQ@N-term                | 1724.9795 | 863.4970  | 2 | -0.0060 |
| <1   | 8  | 74      | ISGGVSGQAGALRLGVAR | No ITRAQ@N-term             | 1724.9646 | 863.4896  | 2 | 0.0089  |
| <1   | 9  |         | TAAGKPVANRELVVER   | No ITRAQ@N-term, ITRAQ@C... | 1725.0020 | 863.5083  | 2 | -0.0285 |
| <1   | 9  |         | TALTLVAADALEVAPDR  | No ITRAQ@N-term             | 1724.9309 | 863.4727  | 2 | 0.0426  |
| <1   | 8  |         | ASALAGERPGLVRR     | ITRAQ@N-term                | 1724.9768 | 863.4957  | 2 | -0.0033 |

## Precursor MS Region

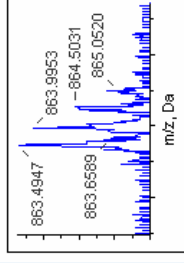

## Fragmentation Evidence for Peptide

ITR SYPEEALVAAVVER

| Residue | b         | y         |
|---------|-----------|-----------|
| S       | 232.1414  | 1725.9867 |
| V       | 331.2098  | 1494.8526 |
| P       | 428.2625  | 1395.7842 |
| E       | 557.3051  | 1298.7314 |
| I       | 670.3892  | 1159.6868 |
| E       | 799.4318  | 1056.6048 |
| A       | 870.4689  | 927.5622  |
| L       | 983.5530  | 856.5251  |
| V       | 1082.6214 | 743.4410  |
| A       | 1153.6585 | 644.3726  |
| A       | 1224.6956 | 573.3355  |
| V       | 1323.7640 | 502.2984  |
| V       | 1422.8324 | 403.2300  |
| E       | 1551.8750 | 304.1615  |
| R       | 1707.9761 | 175.1190  |

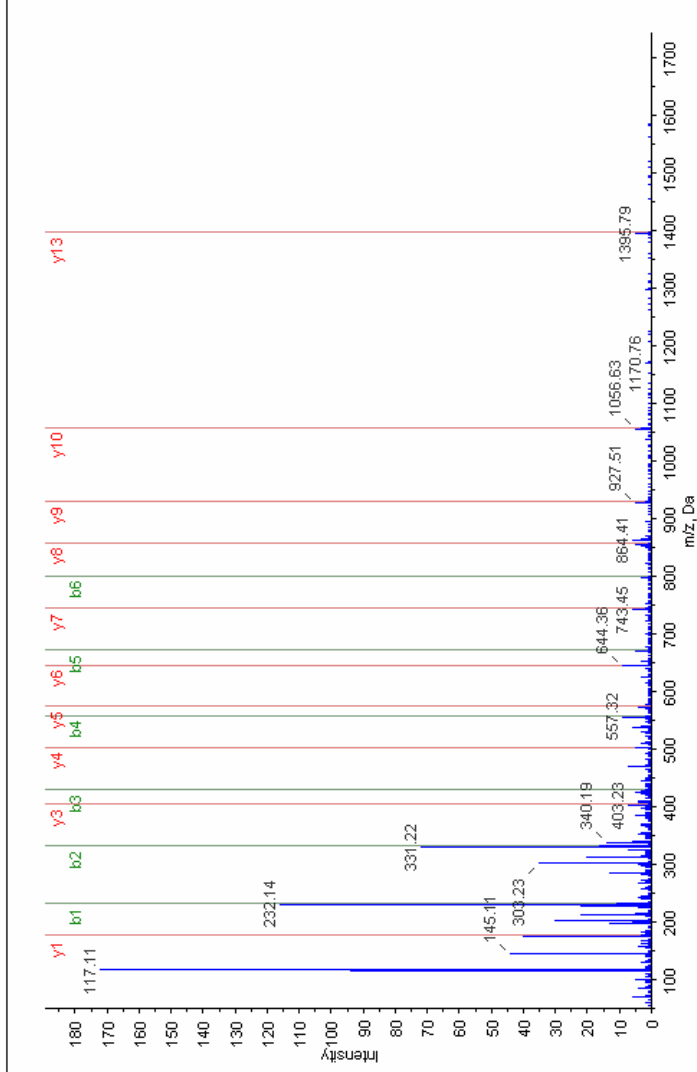

# Protein: SC05086, ActII [16 of 18]

Protein Quant

Protein ID

Spectra

Summary Statistics

## Spectrum List

| Spectrum     | Time   | Prec MW | Prec m/z | Prec z | Best Sequence   | Modifications | Conf | Theor MW  | z | 115:114 | %Err 115:114 |
|--------------|--------|---------|----------|--------|-----------------|---------------|------|-----------|---|---------|--------------|
| 7.1.1.2173.2 | 51.301 | 0.0000  | 863.5010 | 0      | SYPEIEALVAAVVER | ITRAQ@N-term  | 99   | 1724.9795 | 2 | 1.0282  | 10.23        |

## Peptide ID Hypotheses

| Conf | Sc | Prot # | Sequence          | Modifications              | Theor MW  | Theor m/z | z | ΔMass  |
|------|----|--------|-------------------|----------------------------|-----------|-----------|---|--------|
| 99   | 16 | 411    | SYPEIEALVAAVVER   | ITRAQ@N-term               | 1724.9795 | 863.4970  | 2 | 0.0081 |
| <1   | 9  |        | ASALAGERPGLVRR    | ITRAQ@N-term               | 1724.9768 | 863.4957  | 2 | 0.0108 |
| <1   | 8  |        | ASTPGSYTFLLPATR   | ITRAQ@N-term               | 1724.9219 | 863.4683  | 2 | 0.0656 |
| <1   | 8  |        | NVAKLVEPPTDSR     | No ITRAQ@N-term, ITRAQ@... | 1724.9655 | 863.4901  | 2 | 0.0220 |
| <1   | 8  |        | TALTLVAADALEVAPDR | No ITRAQ@N-term            | 1724.9309 | 863.4727  | 2 | 0.0567 |

## Precursor MS Region

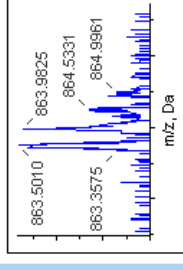

## Fragmentation Evidence for Peptide

ITR SYPEIEALVAAVVER

| Residue | b         | y         |
|---------|-----------|-----------|
| S       | 232.1414  | 1725.9867 |
| V       | 331.2098  | 1494.8526 |
| P       | 428.2625  | 1395.7842 |
| E       | 557.3051  | 1298.7314 |
| I       | 670.3892  | 1169.6888 |
| E       | 799.4318  | 1056.6048 |
| A       | 870.4689  | 927.5622  |
| L       | 983.5530  | 856.5251  |
| V       | 1082.6214 | 743.4410  |
| A       | 1153.6585 | 644.3726  |
| A       | 1224.6956 | 573.3355  |
| V       | 1323.7640 | 502.2984  |
| V       | 1422.8324 | 403.2300  |
| E       | 1551.8750 | 304.1615  |
| R       | 1707.9761 | 175.1190  |

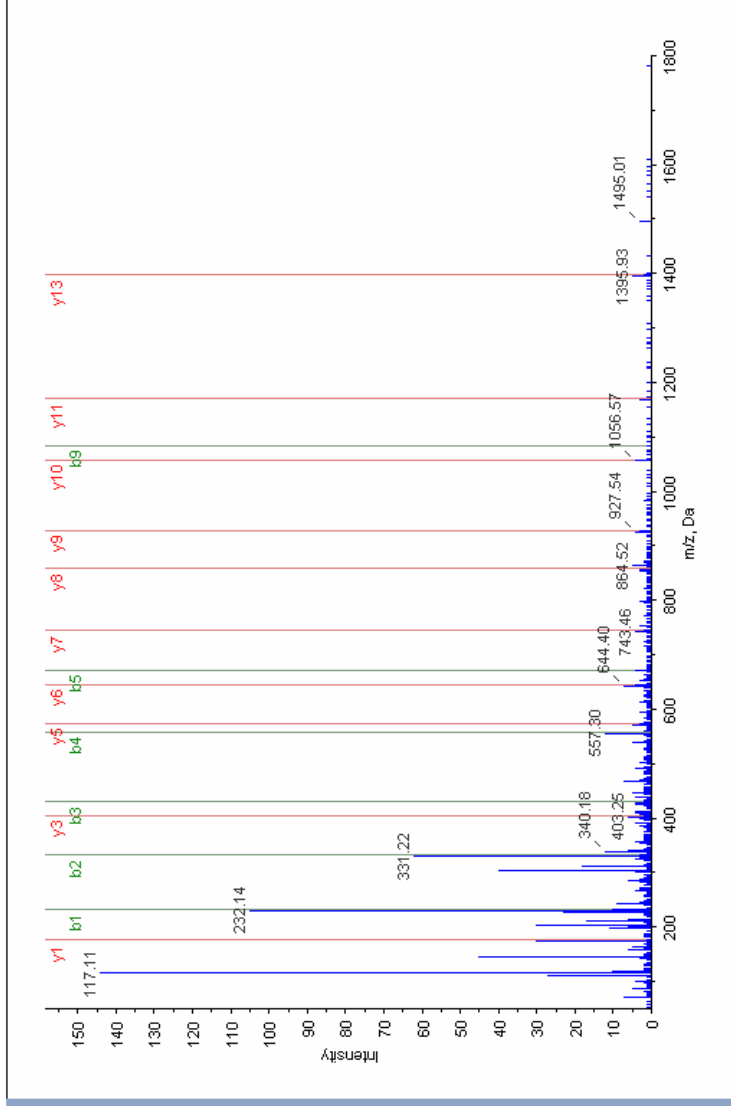

# Protein: SC05086, ActII [17 of 18]

Protein Quant

Protein ID

Spectra

Summary Statistics

## Spectrum List

| Spectrum     | Time   | Prec MW | Prec m/z | Prec z | Best Sequence   | Modifications | Conf | Theor MW  | z | 115:114 | %Err 115:114 |
|--------------|--------|---------|----------|--------|-----------------|---------------|------|-----------|---|---------|--------------|
| 9.1.1.2132.2 | 51.334 | 0.0000  | 863.5089 | 0      | SYPEIEALVAAVVER | ITRAQ@N-term  | 99   | 1724.9794 | 2 | 0.9699  | 0.08         |

## Peptide ID Hypotheses

| Conf | Sc | Prot N | Sequence                   | Modifications              | Theor MW  | Theor m/z | z | ΔMass  |
|------|----|--------|----------------------------|----------------------------|-----------|-----------|---|--------|
| 99   | 15 | 411    | SYPEIEALVAAVVER            | ITRAQ@N-term               | 1724.9794 | 863.4970  | 2 | 0.0238 |
| <1   | 9  |        | AAAAAGADLAGLAHALRAWALDDPQR | No ITRAQ@N-term            | 2587.3254 | 863.4491  | 3 | 0.1793 |
| <1   | 8  |        | EYVGADDPRVAAARR            | ITRAQ@N-term               | 1724.9403 | 863.4774  | 2 | 0.0628 |
| <1   | 8  |        | TAAGRPVAMRELIVR            | No ITRAQ@N-term, ITRAQ@... | 1725.0019 | 863.5082  | 2 | 0.0013 |
| <1   | 8  |        | TALTLVAADALEVAPDR          | No ITRAQ@N-term            | 1724.9308 | 863.4727  | 2 | 0.0723 |

## Precursor MS Region

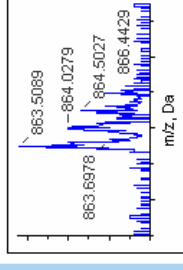

## Fragmentation Evidence for Peptide

ITR SYPEIEALVAAVVER

| Residue | b         | y         |
|---------|-----------|-----------|
| S       | 232.1414  | 1725.9867 |
| V       | 331.2098  | 1494.8526 |
| P       | 428.2625  | 1395.7842 |
| E       | 557.3051  | 1298.7314 |
| I       | 670.3892  | 1169.6888 |
| E       | 799.4318  | 1056.6048 |
| A       | 870.4689  | 927.5622  |
| L       | 983.5530  | 856.5251  |
| V       | 1082.6214 | 743.4410  |
| A       | 1153.6585 | 644.3726  |
| A       | 1224.6956 | 573.3355  |
| V       | 1323.7640 | 502.2984  |
| V       | 1422.8324 | 403.2300  |
| E       | 1551.8750 | 304.1615  |
| R       | 1707.9761 | 175.1190  |

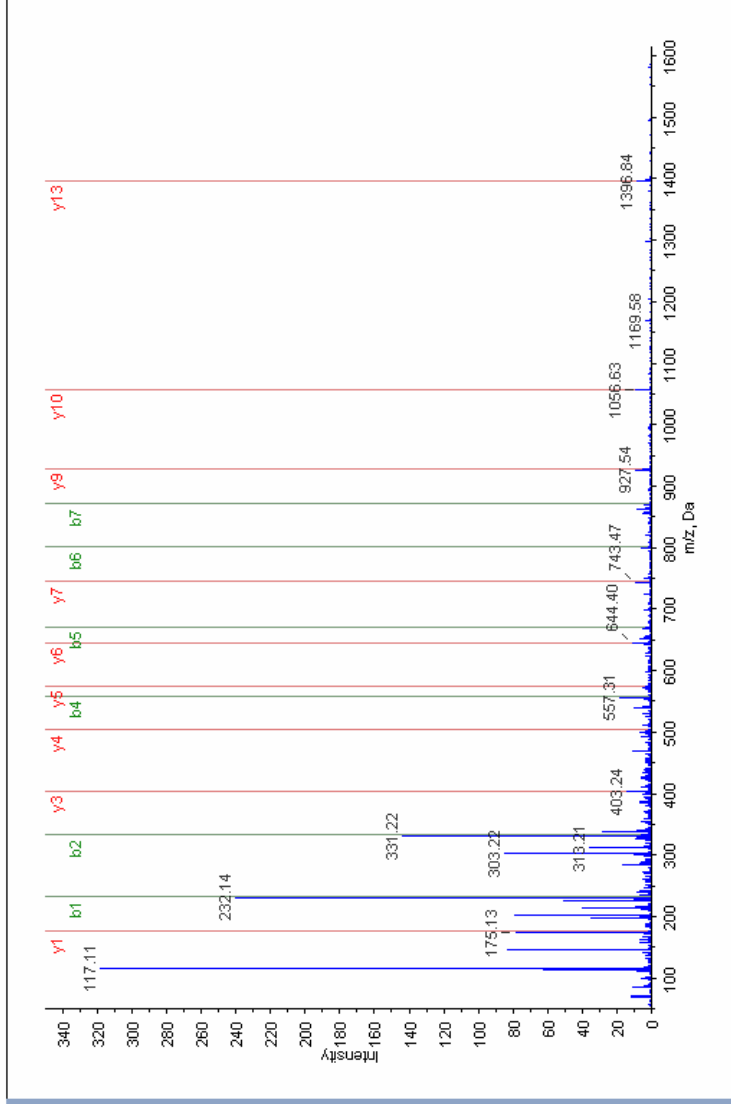



# Protein: SC05086, ActII [18 of 18]

Protein Quant

Protein ID

Spectra

Summary Statistics

## Spectrum List

| Spectrum     | Time   | Prec MW | Prec m/z | Prec z | Best Sequence   | Modifications | Conf | Theor MW  | z | 115:114 | %Err 115:114 |
|--------------|--------|---------|----------|--------|-----------------|---------------|------|-----------|---|---------|--------------|
| 9.1.1.2132.3 | 51.385 | 0.0000  | 863.6394 | 0      | SYPEIEALVAAVVER | ITRAQ@N-term  | 99   | 1724.9794 | 2 | 0.9188  | 8.08         |

## Peptide ID Hypotheses

| Conf | Sc | Prot N | Sequence                                   | Modifications             | Theor MW  | Theor m/z | z | ΔMass   |
|------|----|--------|--------------------------------------------|---------------------------|-----------|-----------|---|---------|
| 99   | 16 | 411    | SYPEIEALVAAVVER                            | ITRAQ@N-term              | 1724.9794 | 863.4970  | 2 | 0.2848  |
| <1   | 8  |        | VEVREVAECVYAYEQAFCGHCYSMAGIVYGGD.GALVVD... | ITRAQ@N-term, MMTS(C)@... | 5175.6355 | 863.6132  | 6 | 0.1570  |
| <1   | 7  |        | VAPTLDDWGRMAQYSDP.SGGQFAVWQPGR             | ITRAQ@N-term              | 3450.6173 | 863.6616  | 4 | -0.0889 |
| <1   | 6  |        | VGVGCMVDSCRECEWCKAGR                       | ITRAQ@N-term, MMTS(C)@... | 2588.0178 | 863.6799  | 3 | -0.1215 |

## Precursor MS Region

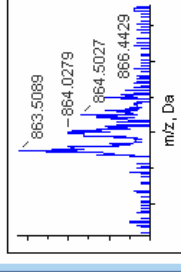

## Fragmentation Evidence for Peptide

ITR SYPEIEALVAAVVER

| Residue | b         | y         |
|---------|-----------|-----------|
| S       | 232.1414  | 1725.9867 |
| V       | 331.2098  | 1494.8526 |
| P       | 428.2625  | 1395.7842 |
| E       | 557.3051  | 1298.7314 |
| I       | 670.3892  | 1169.6888 |
| E       | 799.4318  | 1056.6048 |
| A       | 870.4689  | 927.5622  |
| L       | 983.5530  | 856.5251  |
| V       | 1062.6214 | 743.4410  |
| A       | 1153.6585 | 644.3726  |
| A       | 1224.6956 | 573.3355  |
| V       | 1323.7640 | 502.2984  |
| V       | 1422.8324 | 403.2300  |
| E       | 1551.8750 | 304.1615  |
| R       | 1707.9761 | 175.1190  |

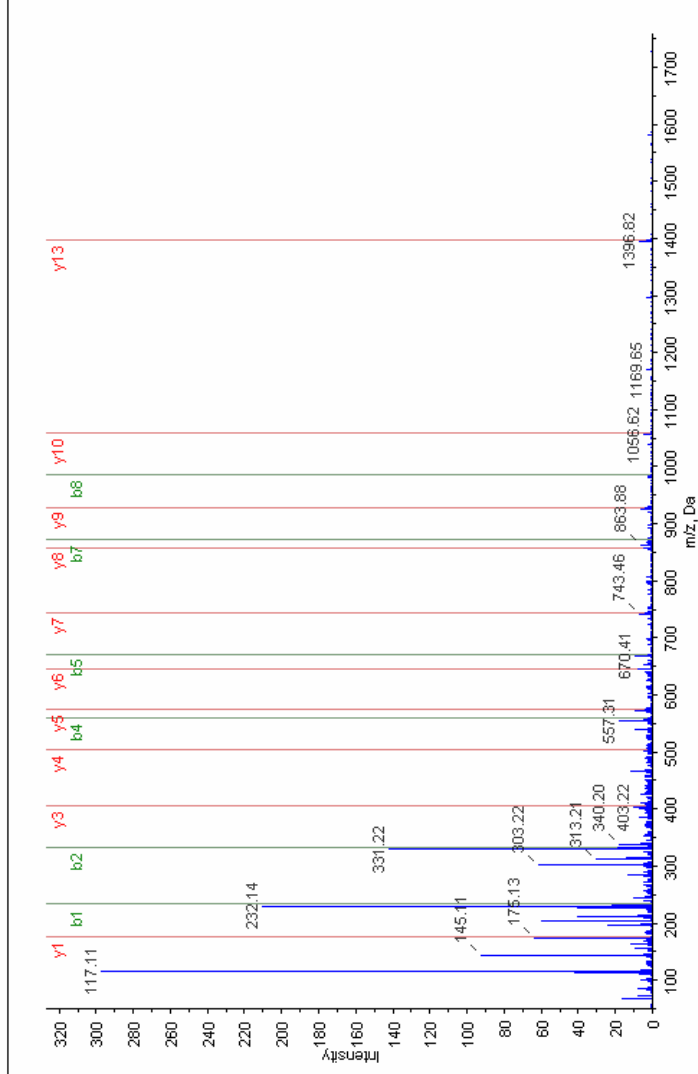

# Protein: SCO5089, Act1 ORF3 [1 of 1]

Protein Quant

Protein ID

Spectra

Summary Statistics

## Spectrum List

| Spectrum     | Time   | Prec MW   | Prec m/z | Prec z | Best Sequence | Modifications | Conf | Theor MW  | z | 115:114 | %Err  | 115:114 |
|--------------|--------|-----------|----------|--------|---------------|---------------|------|-----------|---|---------|-------|---------|
| 21.1.1.960.2 | 33.084 | 1391.7156 | 696.8650 | 2      | YGVSIPDDVAGR  | ITRAQ@N-term  | 99   | 1391.7167 | 2 | 1.4267  | 22.67 | 116     |

## Peptide ID Hypotheses

| Conf | Sc | Prot ID | Sequence      | Modifications               | Theor MW  | Theor m/z | z | ΔMass   |
|------|----|---------|---------------|-----------------------------|-----------|-----------|---|---------|
| 99   | 17 | 642     | YGVSIPDDVAGR  | ITRAQ@N-term                | 1391.7167 | 696.8656  | 2 | -0.0012 |
| <1   | 9  |         | VLNGRSDYSSTTR | No ITRAQ@N-term, Deamid...  | 1391.7005 | 696.8576  | 2 | 0.0151  |
| <1   | 8  |         | YGPAAATTEADPR | ITRAQ@N-term                | 1391.6903 | 696.8474  | 2 | 0.0352  |
| <1   | 8  |         | YRAEISEGRAP   | ITRAQ@N-term                | 1391.7280 | 696.8712  | 2 | -0.0124 |
| <1   | 7  |         | SLGWNQVDGK    | ITRAQ@N-term, Deamidatio... | 1391.7289 | 696.8717  | 2 | -0.0133 |

## Precursor MS Region

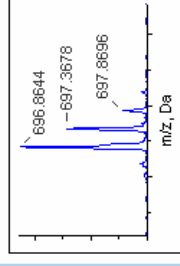

## Fragmentation Evidence for Peptide

ITR YGVSIPDDVAGR

| Res | b         | y         |
|-----|-----------|-----------|
| Y   | 308.1727  | 1392.7240 |
| G   | 365.1941  | 1085.5586 |
| V   | 464.2625  | 1028.5371 |
| S   | 551.2946  | 929.4687  |
| I   | 664.3786  | 842.4567  |
| P   | 761.4314  | 728.3526  |
| D   | 875.4583  | 632.2998  |
| D   | 991.4853  | 517.2729  |
| V   | 1090.5537 | 402.2459  |
| A   | 1161.5908 | 303.1775  |
| G   | 1218.6123 | 232.1404  |
| R   | 1374.7134 | 175.1190  |

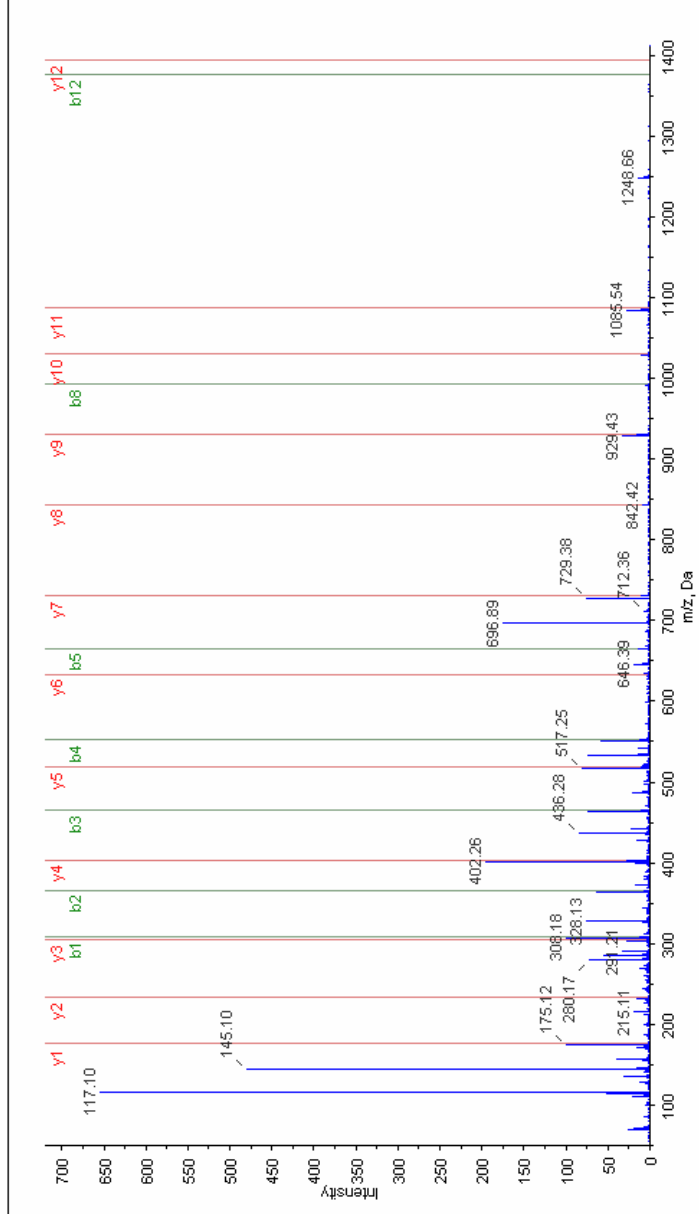

# Protein: SC05139, DapE [1 of 1]

Protein Quant

Protein ID

Spectra

Summary Statistics

## Spectrum List

| Spectrum     | Time   | Prec MW   | Prec m/z | Prec z | Best Sequence   | Modifications | Conf | Theor MW  | z | 115:114 | %Err  | 115:114 |
|--------------|--------|-----------|----------|--------|-----------------|---------------|------|-----------|---|---------|-------|---------|
| 42.1.1.952.5 | 30.064 | 1853.9569 | 464.4965 | 4      | YAPDRSPEEALAHVR | ITRAQ@N-term  | 99   | 1853.9506 | 4 | 1.0617  | 11.55 | 116     |

## Peptide ID Hypotheses

| Conf | Sc | Prot ID | Sequence         | Modifications                 | Theor MW  | Theor m/z | z | ΔMass   |
|------|----|---------|------------------|-------------------------------|-----------|-----------|---|---------|
| 99   | 14 | 803     | YAPDRSPEEALAHVR  | ITRAQ@N-term                  | 1853.9506 | 464.4949  | 4 | 0.0063  |
| <1   | 6  | 751     | LAHALEQTVGADVDYR | ITRAQ@N-term, Oxidation(H...) | 1853.9605 | 464.4974  | 4 | -0.0036 |
| <1   | 9  |         | ASVAYYADPRDALHVR | No ITRAQ@N-term               | 1853.9384 | 464.4919  | 4 | 0.0185  |
| <1   | 7  |         | AHLDIGNLPITTTNDK | No ITRAQ@N-term, ITRAQ@...    | 1853.9605 | 464.4974  | 4 | -0.0036 |
| <1   | 6  |         | ELATTGLFLAIHQDPR | ITRAQ@N-term                  | 1854.0122 | 464.5103  | 4 | -0.0553 |

## Precursor MS Region

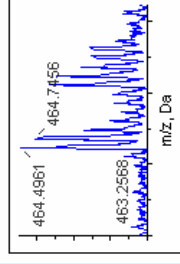

## Fragmentation Evidence for Peptide

ITR YAPDRSPEEALAHVR

| Res | b         | y         |
|-----|-----------|-----------|
| Y   | 308.1727  | 1854.9579 |
| A   | 379.2098  | 1547.7925 |
| P   | 476.2625  | 1476.7554 |
| D   | 591.2895  | 1379.7026 |
| R   | 747.3906  | 1264.6757 |
| S   | 834.4226  | 1108.5745 |
| P   | 931.4754  | 1021.5425 |
| E   | 1060.5180 | 924.4898  |
| E   | 1189.5606 | 795.4472  |
| A   | 1260.5977 | 666.4046  |
| L   | 1373.6818 | 595.3675  |
| A   | 1444.7189 | 482.2834  |
| H   | 1581.7778 | 411.2463  |
| V   | 1680.8462 | 274.1874  |
| R   | 1836.9473 | 175.1190  |

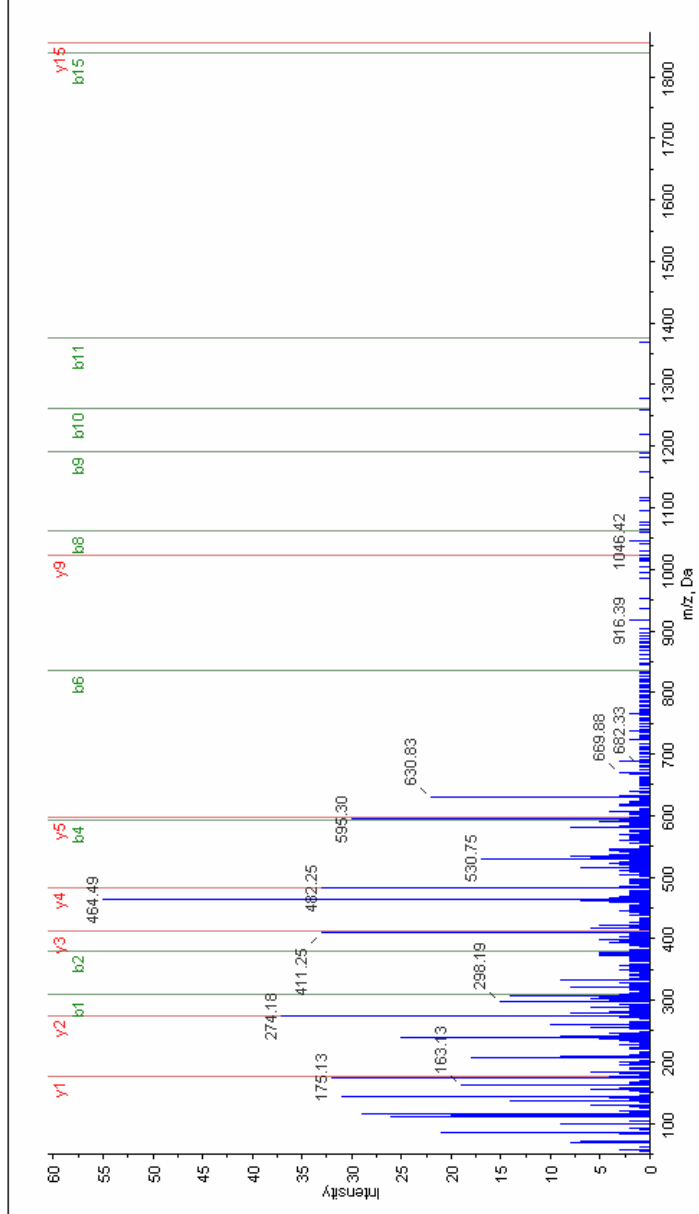

# Protein: SC05354, ThrA [1 of 1]

Protein Quant

Protein ID

Spectra

Summary Statistics

## Spectrum List

| Spectrum     | Time   | Prec MW   | Prec m/z | Prec z | Best Sequence       | Modifications | Conf | Theor MW  | z | 115:114 | %Err 115:114 | 116 |
|--------------|--------|-----------|----------|--------|---------------------|---------------|------|-----------|---|---------|--------------|-----|
| 41.1.1.994.2 | 34.999 | 1895.0726 | 474.7754 | 4      | VHPAMT.PLSHP.LANVVR | ITRAQ@N-term  | 99   | 1895.0685 | 4 | 1.1405  | 9.41         | 116 |

## Peptide ID Hypotheses

| Conf | Sc | Prot ID | Sequence            | Modifications              | Theor MW  | Theor m/z | z | ΔMass   |
|------|----|---------|---------------------|----------------------------|-----------|-----------|---|---------|
| 99   | 17 | 892     | VHPAMT.PLSHP.LANVVR | ITRAQ@N-term               | 1895.0685 | 474.7744  | 4 | 0.0041  |
| <1   | 7  |         | EAGGNGLP.SYFPRR     | ITRAQ@N-term, ITRAQ(Y)@... | 1895.0006 | 474.7574  | 4 | 0.0721  |
| <1   | 6  |         | HEVTVYVRGTAFEIR     | ITRAQ@N-term               | 1895.0459 | 474.7688  | 4 | 0.0267  |
| <1   | 6  |         | HLAQVGLGL.FFRELR    | ITRAQ@N-term               | 1895.1227 | 474.7879  | 4 | -0.0501 |

## Precursor MS Region

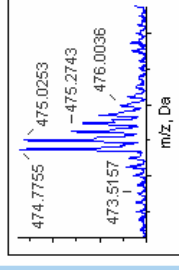

## Fragmentation Evidence for Peptide

ITR VHPAMT.PLSHP.LANVVR

| Res | b         | y         |
|-----|-----------|-----------|
| V   | 244.1778  | 1896.0758 |
| H   | 381.2367  | 1652.9053 |
| P   | 478.2894  | 1515.8464 |
| A   | 549.3265  | 1418.7937 |
| M   | 680.3670  | 1347.7566 |
| I   | 793.4611  | 1216.7161 |
| P   | 890.5039  | 1103.6320 |
| L   | 1003.5879 | 1006.5792 |
| S   | 1090.6199 | 893.4952  |
| H   | 1227.6789 | 806.4631  |
| P   | 1324.7316 | 669.4042  |
| L   | 1437.8157 | 572.3515  |
| A   | 1508.8528 | 469.2674  |
| N   | 1622.8957 | 388.2303  |
| V   | 1721.9641 | 274.1874  |
| R   | 1878.0653 | 175.1190  |

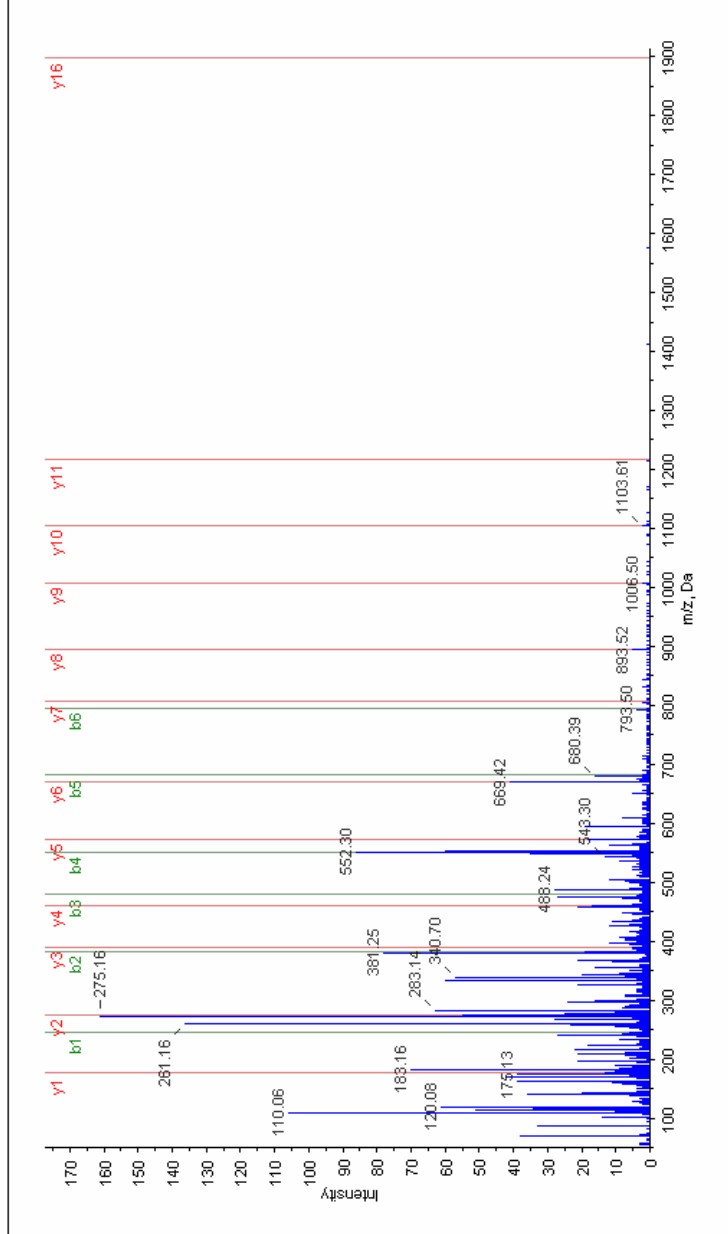

# Protein: SC05356, ThrB [1 of 1]

Protein Quant

Protein ID

Spectra

Summary Statistics

## Spectrum List

| Spectrum     | Time   | Prec MW   | Prec m/z | Prec z | Best Sequence  | Modifications               | Conf | Theor MW  | z | 115:114 | %Err  | 115:114 |
|--------------|--------|-----------|----------|--------|----------------|-----------------------------|------|-----------|---|---------|-------|---------|
| 33.1.1.921.5 | 25.121 | 1408.7286 | 470.5835 | 3      | SVPHYDAAANA GR | ITRAQ@N-term, Deamidatio... | 99   | 1408.7180 | 3 | 0.9327  | 14.23 | 116     |

## Peptide ID Hypotheses

| Conf | Sc | Prot N | Sequence         | Modifications               | Theor MW  | Theor m/z | z | ΔMass   |
|------|----|--------|------------------|-----------------------------|-----------|-----------|---|---------|
| 99   | 15 | 723    | SVPHYDAAANA GR   | ITRAQ@N-term, Deamidatio... | 1408.7180 | 470.5799  | 3 | 0.0106  |
| <1   | 7  |        | SSAA FGRDE VSAGR | No ITRAQ@N-term             | 1408.6895 | 470.5638  | 3 | 0.0592  |
| <1   | 7  |        | TGAA GETLS FRR   | ITRAQ@N-term                | 1408.7544 | 470.5921  | 3 | -0.0256 |
| <1   | 6  |        | AQGD GGLDHSALLR  | No ITRAQ@N-term             | 1408.7059 | 470.5759  | 3 | 0.0228  |
| <1   | 6  |        | TGHVQLADMPGR     | ITRAQ@N-term, Deamidatio... | 1408.7180 | 470.5799  | 3 | 0.0106  |

## Precursor MS Region

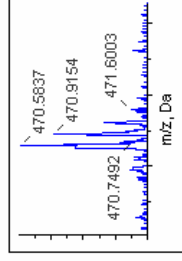

## Fragmentation Evidence for Peptide

ITR | SVPHYDAAAN[Dea]AGR

| Res | b         | y         |
|-----|-----------|-----------|
| S   | 232.1414  | 1409.7254 |
| V   | 331.2098  | 1178.5913 |
| P   | 428.2625  | 1079.5228 |
| H   | 565.3215  | 982.4701  |
| V   | 664.3899  | 845.4112  |
| D   | 779.4168  | 746.3428  |
| A   | 850.4539  | 631.3158  |
| A   | 921.4910  | 560.2787  |
| A   | 992.5282  | 489.2416  |
| N   | 1107.5551 | 418.2045  |
| A   | 1178.5922 | 303.1775  |
| G   | 1235.6137 | 232.1404  |
| R   | 1394.7148 | 175.1190  |

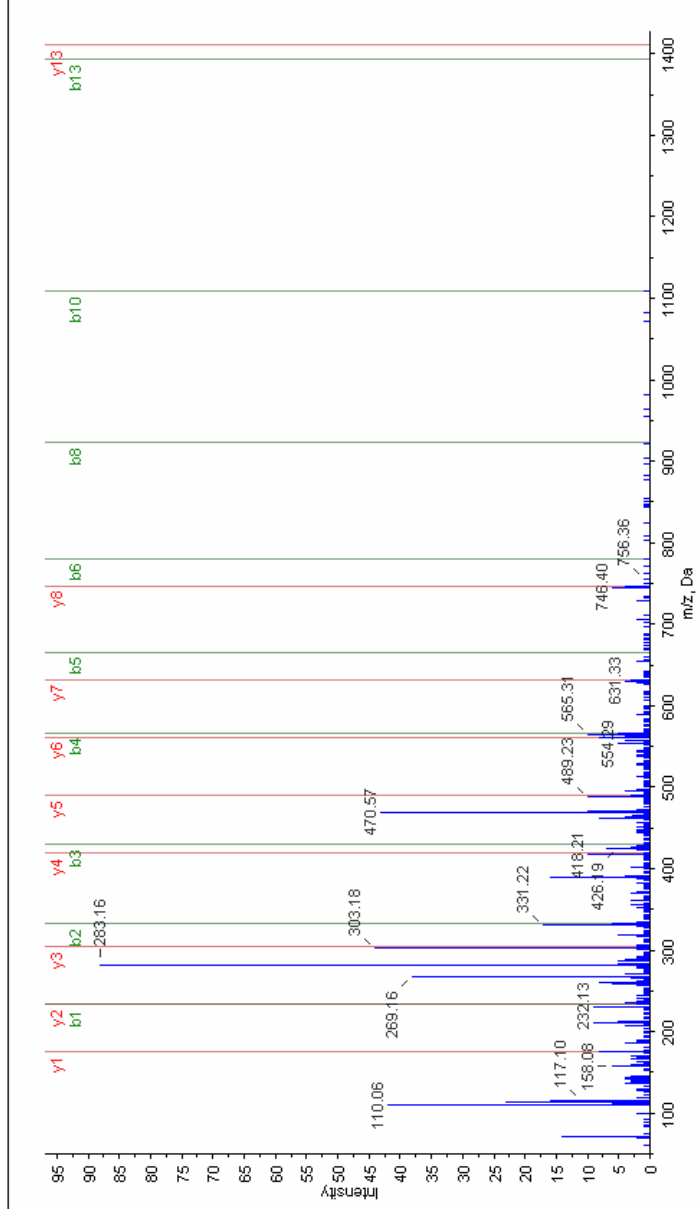

# Protein: SC05366, Atpl [1 of 1]

Protein Quant

Protein ID

Spectra

Summary Statistics

## Spectrum List

| Spectrum     | Time   | Prec MW   | Prec m/z | Prec z | Best Sequence | Modifications              | Conf | Theor MW  | z | 115:114 | %Err | 115:114 |
|--------------|--------|-----------|----------|--------|---------------|----------------------------|------|-----------|---|---------|------|---------|
| 36.1.1.935.3 | 28.233 | 2146.1736 | 716.3985 | 3      | VLVYEFPTGEPEK | ITRAQ@N-term, ITRAQ(K)@... | 99   | 2146.1887 | 3 | 0.9372  | 7.92 | 116     |

## Peptide ID Hypotheses

| Conf | Sc | Prot N | Sequence             | Modifications               | Theor MW  | Theor m/z | z | ΔMass   |
|------|----|--------|----------------------|-----------------------------|-----------|-----------|---|---------|
| 99   | 14 | 587    | VLVYEFPTGEPEK        | ITRAQ@N-term, ITRAQ(K)@...  | 2146.1887 | 716.4035  | 3 | -0.0151 |
| <1   | 7  |        | DLCAGYQRLLDGTAAATAAR | No ITRAQ@N-term             | 2146.1243 | 716.3820  | 3 | 0.0492  |
| <1   | 7  |        | TDPSLELINAQAQAADK    | ITRAQ@N-term, Deamidatio... | 2146.1474 | 716.3898  | 3 | 0.0262  |
| <1   | 6  |        | EHQTALLARSAAAAPAGDR  | ITRAQ@N-term                | 2146.1365 | 716.3861  | 3 | 0.0371  |
| <1   | 6  |        | VASVGLPYAYNIPIDITK   | ITRAQ@N-term, ITRAQ(K)@...  | 2146.1878 | 716.4032  | 3 | -0.0142 |

## Precursor MS Region

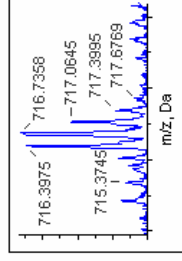

## Fragmentation Evidence for Peptide

ITR | VLVYEFPTGEK(ITR)PEK(ITR)

| Res  | b         | y         |
|------|-----------|-----------|
| V    | 244.1778  | 2147.1960 |
| L    | 357.2618  | 1904.0255 |
| Y    | 520.3251  | 1790.9414 |
| V    | 615.3936  | 1627.8781 |
| E    | 748.4362  | 1528.8097 |
| P    | 845.4889  | 1399.7671 |
| E    | 974.5315  | 1302.7143 |
| P    | 1071.5843 | 1173.6717 |
| T    | 1172.6320 | 1076.6190 |
| G    | 1229.6534 | 975.5713  |
| E    | 1358.6960 | 918.5498  |
| K(I) | 1630.8930 | 789.5072  |
| P    | 1727.9458 | 517.3102  |
| E    | 1856.9894 | 420.2575  |
| K(I) | 2129.1854 | 291.2149  |

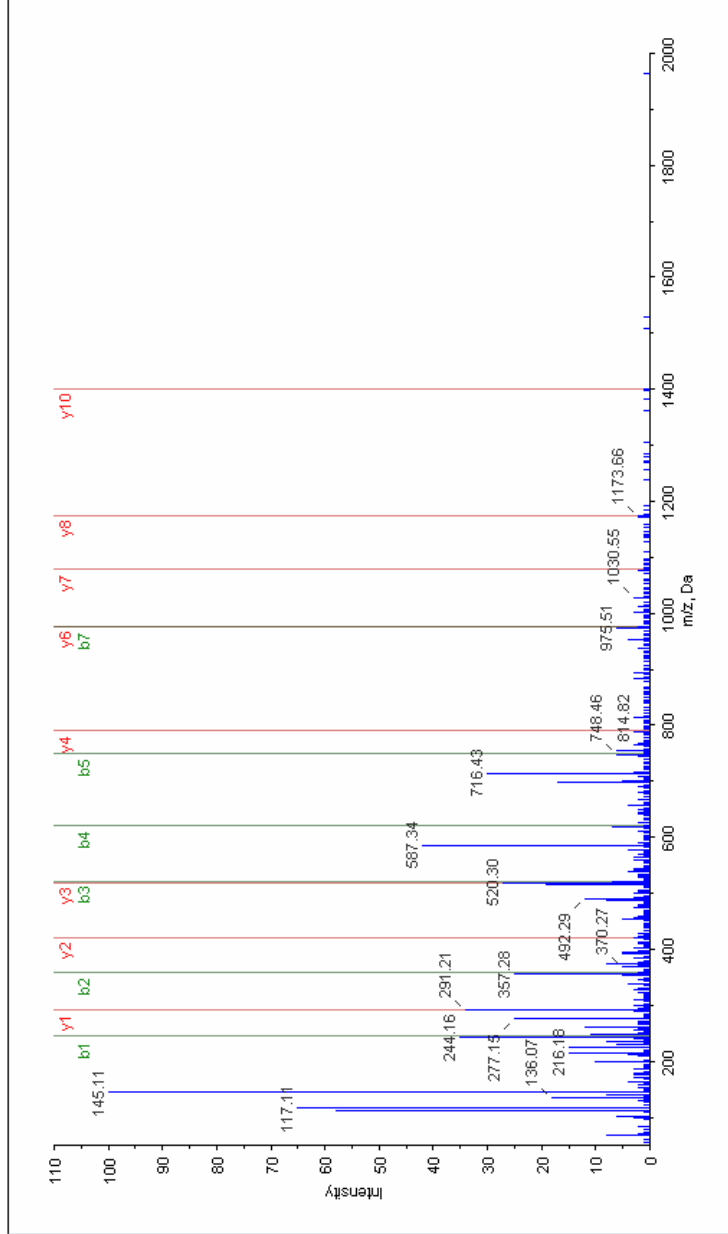

# Protein: SC05368, AtpE [1 of 2]

Protein Quant

Protein ID

Spectra

Summary Statistics

## Spectrum List

| Spectrum     | Time   | Prec MW  | Prec m/z | Prec z | Best Sequence | Modifications   | Conf | Theor MW | z | 115:114 | %Err | 115:114 |
|--------------|--------|----------|----------|--------|---------------|-----------------|------|----------|---|---------|------|---------|
| 4.1.1.1305.2 | 33.706 | 936.5016 | 469.2581 | 2      | QPEAAGLIR     | PGA of Q@N-term | 99   | 936.5029 | 2 |         |      | 116     |

## Peptide ID Hypotheses

| Conf | Sc | Prot N | Sequence  | Modifications   | Theor MW | Theor m/z | z | ΔMass   |
|------|----|--------|-----------|-----------------|----------|-----------|---|---------|
| 99   | 12 | 592    | QPEAAGLIR | PGA of Q@N-term | 936.5029 | 469.2587  | 2 | -0.0013 |
| <1   | 8  |        | DQLTAAAYR | No ITRAQ@N-term | 936.4665 | 469.2405  | 2 | 0.0351  |
| <1   | 7  |        | ELAAAYR   | ITRAQ@N-term    | 936.5151 | 469.2648  | 2 | -0.0134 |
| <1   | 6  |        | DRLAAYR   | ITRAQ@N-term    | 936.5263 | 469.2704  | 2 | -0.0247 |
| <1   | 6  |        | EEPAEQPR  | PGA of E@N-term | 936.4301 | 469.2223  | 2 | 0.0715  |

## Precursor MS Region

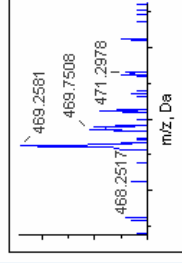

## Fragmentation Evidence for Peptide

PGA QPEAAGLIR

| Res | b        | y        |
|-----|----------|----------|
| Q   | 112.0393 | 937.5102 |
| P   | 209.0921 | 826.4761 |
| E   | 338.1347 | 729.4254 |
| A   | 409.1718 | 600.3828 |
| A   | 480.2089 | 529.3457 |
| G   | 537.2304 | 468.3085 |
| L   | 650.3144 | 401.2871 |
| I   | 763.3985 | 288.2030 |
| R   | 919.4996 | 176.1190 |

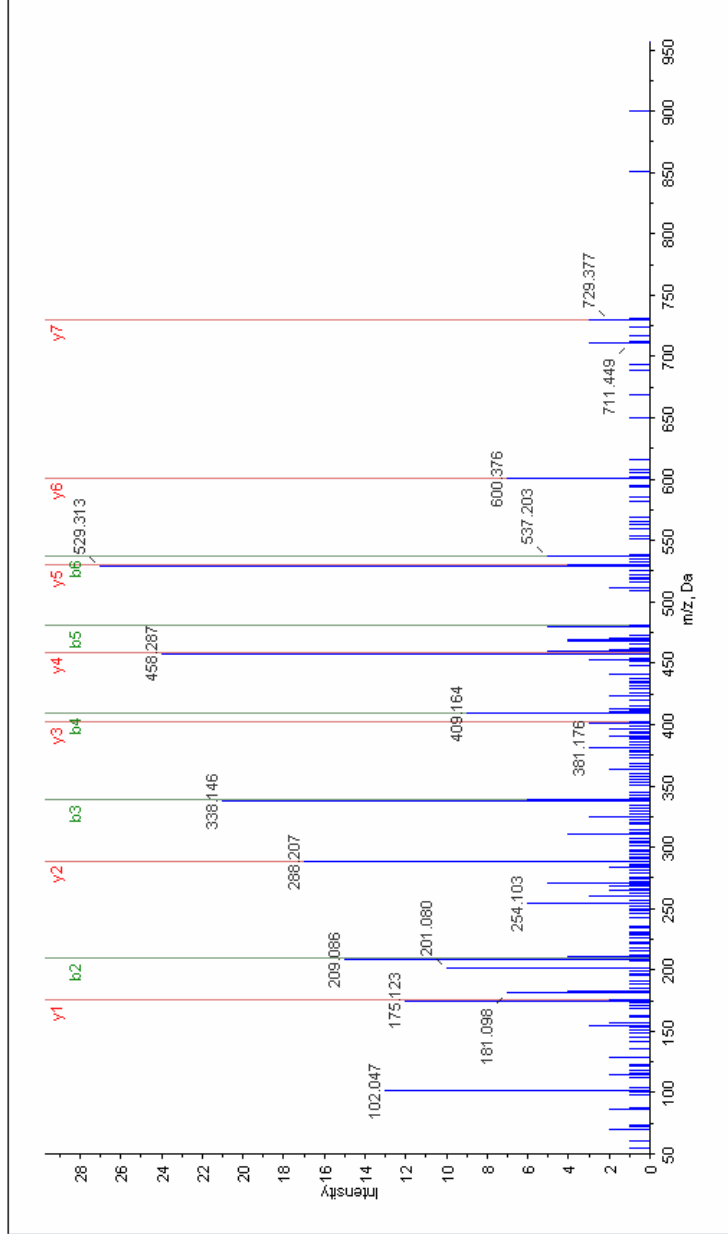

# Protein: SC05368, AtpE [2 of 2]

Protein Quant

Protein ID

Spectra

Summary Statistics

## Spectrum List

| Spectrum     | Time   | Prec MW   | Prec m/z | Prec z | Best Sequence | Modifications | Conf | Theor MW  | z | 115:114 | %Err | 115:114 |
|--------------|--------|-----------|----------|--------|---------------|---------------|------|-----------|---|---------|------|---------|
| 5.1.1.2131.2 | 40.063 | 1097.6117 | 549.8131 | 2      | QPEAAGLIR     | ITRAQ@N-term  | 99   | 1097.6315 | 2 | 0.9454  | 1.87 | 116     |

## Peptide ID Hypotheses

| Conf | Sc | Prot ID | Sequence   | Modifications               | Theor MW  | Theor m/z | z | ΔMass   |
|------|----|---------|------------|-----------------------------|-----------|-----------|---|---------|
| 99   | 14 | 594     | QPEAAGLIR  | ITRAQ@N-term                | 1097.6315 | 549.8230  | 2 | -0.0198 |
| <1   | 8  |         | EDAQIKIR   | PGA of E@N-term, ITRAQ(K... | 1097.6315 | 549.8230  | 2 | -0.0198 |
| <1   | 8  |         | RACLARDAIR | No ITRAQ@N-term             | 1097.6418 | 549.8281  | 2 | -0.0301 |
| <1   | 8  |         | VQVVAEGPR  | ITRAQ@N-term                | 1097.6315 | 549.8230  | 2 | -0.0198 |
| <1   | 7  |         | DELVPLLR   | ITRAQ@N-term                | 1097.6566 | 549.8356  | 2 | -0.0449 |

## Precursor MS Region

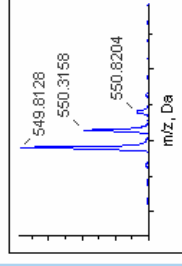

## Fragmentation Evidence for Peptide

ITR QPEAAGLIR

| Residue | b         | y         |
|---------|-----------|-----------|
| Q       | 273.1679  | 1098.6388 |
| P       | 370.2207  | 826.4781  |
| E       | 499.2633  | 729.4254  |
| A       | 570.3004  | 600.3828  |
| A       | 641.3375  | 529.3457  |
| G       | 698.3590  | 458.3085  |
| L       | 811.4430  | 401.2871  |
| I       | 924.5271  | 288.2030  |
| R       | 1060.6282 | 175.1190  |

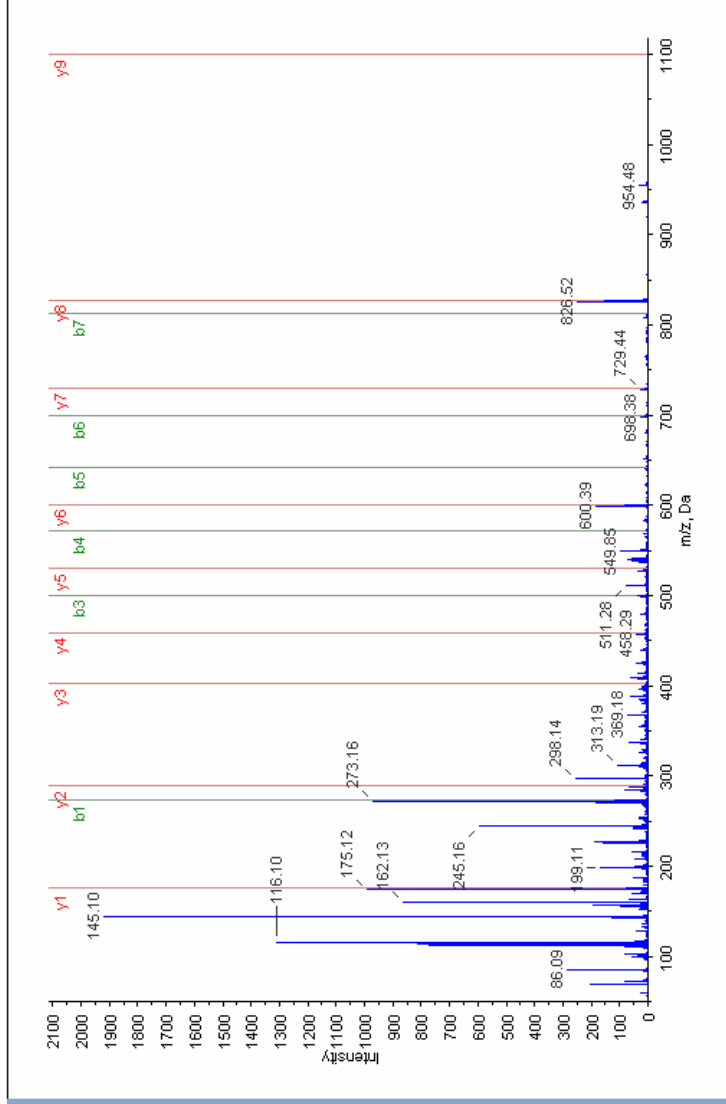



# Protein: SC05739, DapB [1 of 2]

Protein Quant

Protein ID

Spectra

Summary Statistics

## Spectrum List

| Spectrum     | Time   | Prec MW   | Prec m/z | Prec z | Best Sequence                                                              | Modifications | Conf | Theor MW  | z | 115:114 | %Err  | 115:114 |
|--------------|--------|-----------|----------|--------|----------------------------------------------------------------------------|---------------|------|-----------|---|---------|-------|---------|
| 20.1.1.963.4 | 30.091 | 1755.8937 | 878.9541 | 2      | AGSAPAPD <sup>1</sup> ATA <sup>2</sup> TALD <sup>3</sup> GA <sup>4</sup> R | ITRAQ@N-term  | 99   | 1755.8874 | 2 | 0.5772  | 13.96 | 116     |

## Peptide ID Hypotheses

| Conf | Sc | Prot N | Sequence                                                                                               | Modifications                | Theor MW  | Theor m/z | z | ΔMass  |
|------|----|--------|--------------------------------------------------------------------------------------------------------|------------------------------|-----------|-----------|---|--------|
| 99   | 14 | 853    | AGSAPAPD <sup>1</sup> ATA <sup>2</sup> TALD <sup>3</sup> GA <sup>4</sup> R                             | ITRAQ@N-term                 | 1755.8874 | 878.9509  | 2 | 0.0063 |
| <1   | 6  |        | AEEPTA <sup>1</sup> TTS <sup>2</sup> RWF <sup>3</sup> SA <sup>4</sup> PR                               | No ITRAQ@N-term              | 1755.8540 | 878.9343  | 2 | 0.0396 |
| <1   | 5  |        | ALDD <sup>1</sup> VTY <sup>2</sup> LC <sup>3</sup> YIT <sup>4</sup> GA <sup>5</sup> R                  | No ITRAQ@N-term, MMTS(...    | 1755.8536 | 878.9340  | 2 | 0.0401 |
| <1   | 5  |        | QATGE <sup>1</sup> AAAV <sup>2</sup> S <sup>3</sup> ATA <sup>4</sup> MA <sup>5</sup> AG <sup>6</sup> R | PGA of Q@N-term, Desamida... | 1755.8500 | 878.9323  | 2 | 0.0437 |
| <1   | 5  |        | TLMD <sup>1</sup> DR <sup>2</sup> SWA <sup>3</sup> HNG <sup>4</sup> AR                                 | ITRAQ@N-term                 | 1755.8523 | 878.9334  | 2 | 0.0414 |

## Precursor MS Region

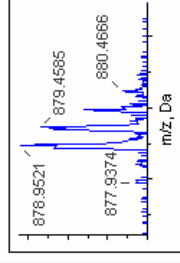

## Fragmentation Evidence for Peptide

ITR | AGSAPAPD<sup>1</sup>ATA<sup>2</sup>TALD<sup>3</sup>GA<sup>4</sup>R

| Res | b         | y         |
|-----|-----------|-----------|
| A   | 216.1465  | 1756.8946 |
| G   | 273.1679  | 1541.7554 |
| S   | 360.1999  | 1484.7340 |
| A   | 431.2371  | 1397.7019 |
| P   | 528.2898  | 1326.6648 |
| A   | 599.3269  | 1229.6121 |
| P   | 696.3797  | 1158.5749 |
| D   | 811.4086  | 1061.5222 |
| A   | 882.4438  | 946.4952  |
| T   | 983.4914  | 875.4581  |
| A   | 1054.5285 | 774.4104  |
| T   | 1155.5762 | 703.3733  |
| A   | 1226.6133 | 602.3257  |
| L   | 1339.6974 | 531.2885  |
| D   | 1454.7243 | 418.2045  |
| G   | 1511.7458 | 303.1775  |
| A   | 1582.7829 | 246.1561  |
| R   | 1738.8840 | 175.1190  |

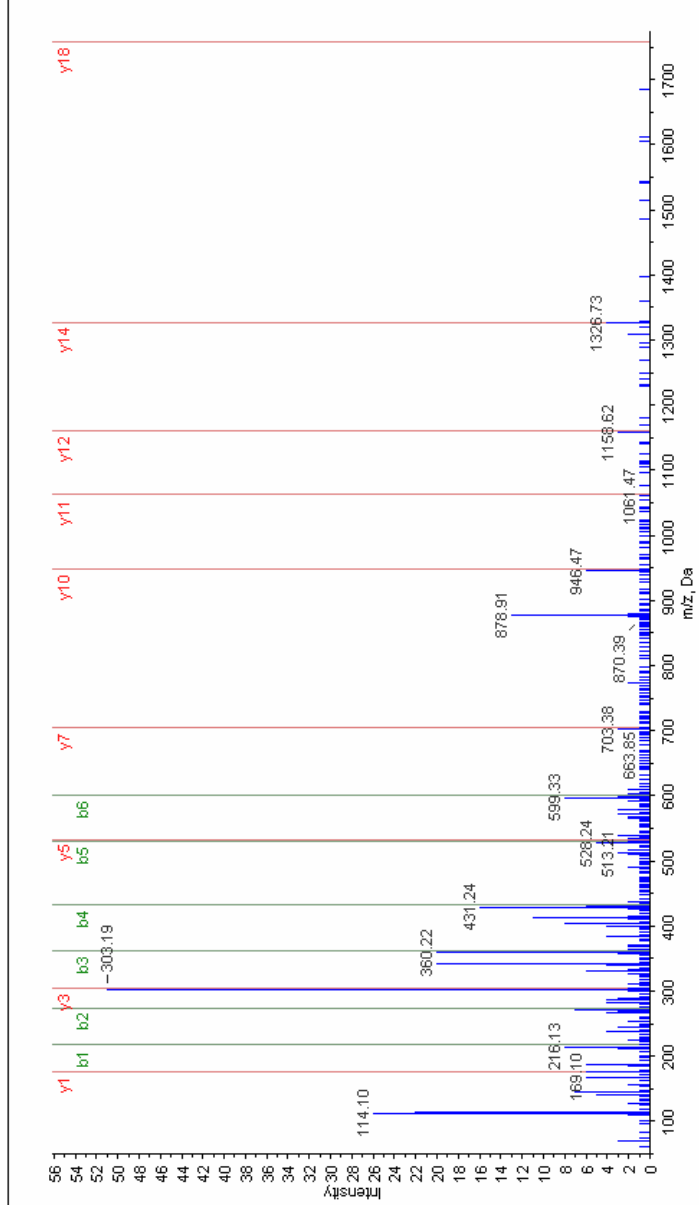

# Protein: SC05739, DapB [2 of 2]

Protein Quant

Protein ID

Spectra

Summary Statistics

## Spectrum List

| Spectrum     | Time   | Prec MW   | Prec m/z | Prec z | Best Sequence    | Modifications | Conf | Theor MW  | z | 115:114 | %Err | 115:114 |
|--------------|--------|-----------|----------|--------|------------------|---------------|------|-----------|---|---------|------|---------|
| 20.1.1.963.5 | 30.142 | 1755.9067 | 586.3095 | 3      | AGSAPAPDATALDGAR | ITRAQ@N-term  | 99   | 1755.8875 | 3 |         |      | 116     |

## Peptide ID Hypotheses

| Conf | Sc | Prot N | Sequence         | Modifications               | Theor MW  | Theor m/z | z | ΔMass   |
|------|----|--------|------------------|-----------------------------|-----------|-----------|---|---------|
| 99   | 15 | 853    | AGSAPAPDATALDGAR | ITRAQ@N-term                | 1755.8875 | 586.3031  | 3 | 0.0193  |
| <1   | 5  | 80     | ALAGALTSIMTQTSYR | ITRAQ@N-term                | 1755.9312 | 586.3177  | 3 | -0.0245 |
| <1   | 7  |        | ASDAWYALGGGRHHR  | ITRAQ@N-term, Deamidatio... | 1755.9109 | 586.3109  | 3 | -0.0041 |
| <1   | 7  |        | ATADAVRYARAVEGAR | ITRAQ@N-term                | 1755.9827 | 586.3348  | 3 | -0.0760 |
| <1   | 7  |        | ESGSPDLALVYNTGPR | ITRAQ@N-term, Deamidatio... | 1755.9126 | 586.3115  | 3 | -0.0059 |

## Precursor MS Region

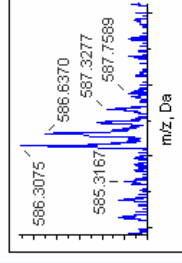

## Fragmentation Evidence for Peptide

ITR | AGSAPAPDATALDGAR

| Res | b         | y         |
|-----|-----------|-----------|
| A   | 216.1465  | 1756.8946 |
| G   | 273.1679  | 1541.7554 |
| S   | 360.1999  | 1484.7340 |
| A   | 431.2371  | 1397.7019 |
| P   | 528.2898  | 1326.6648 |
| A   | 599.3269  | 1229.6121 |
| P   | 696.3797  | 1158.5749 |
| D   | 811.4066  | 1061.5222 |
| A   | 882.4438  | 948.4952  |
| T   | 983.4914  | 875.4581  |
| A   | 1054.5285 | 774.4104  |
| T   | 1155.5762 | 703.3733  |
| A   | 1226.6133 | 602.3257  |
| L   | 1339.6974 | 531.2885  |
| D   | 1454.7243 | 418.2045  |
| G   | 1511.7458 | 303.1775  |
| A   | 1582.7829 | 246.1561  |
| R   | 1738.8840 | 175.1190  |

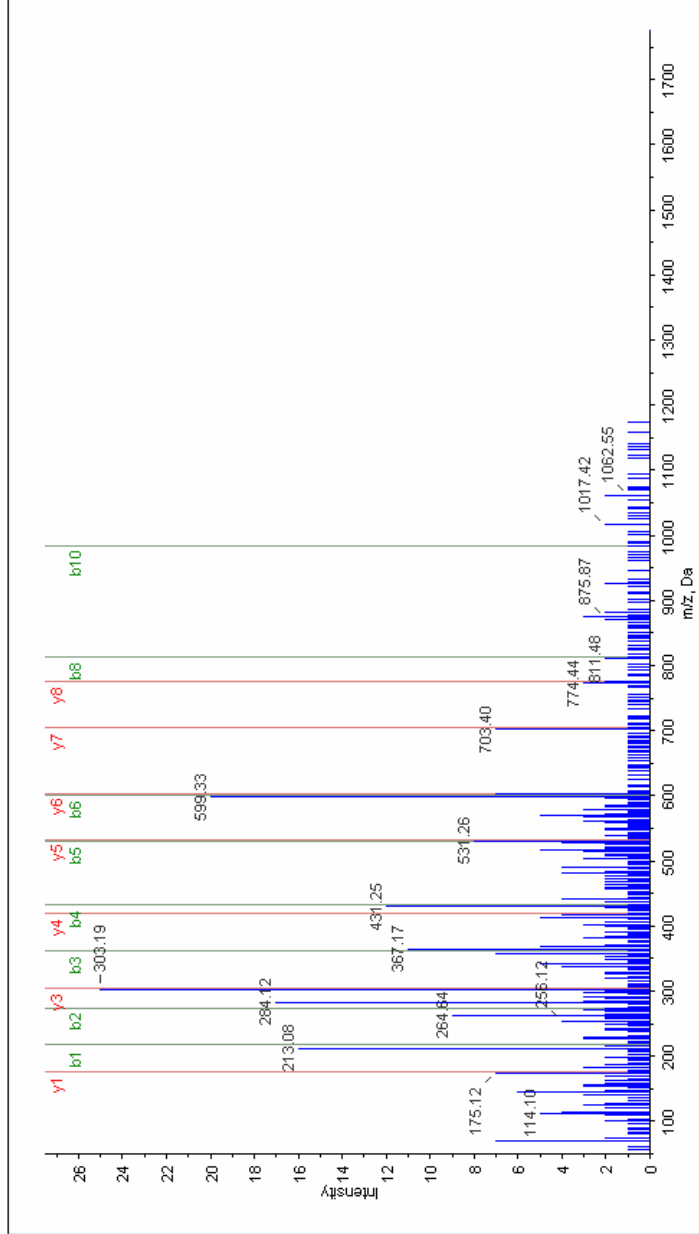

# Protein: SC05774, GluD [ 1 of 2 ]

Protein Quant

Protein ID

Spectra

Summary Statistics

## Spectrum List

| Spectrum    | Time   | Prec MW   | Prec m/z | Prec z | Best Sequence         | Modifications | Conf | Theor MW  | z | 115:114 | %Err  | 115:114 |
|-------------|--------|-----------|----------|--------|-----------------------|---------------|------|-----------|---|---------|-------|---------|
| 9.1.1.939.2 | 26.651 | 1628.7589 | 815.3867 | 2      | ADDA.GLPGGAA.TGAGGGGN | ITRAQ@N-term  | 99   | 1628.7512 | 2 | 4.5325  | 21.14 | 116     |

## Peptide ID Hypotheses

| Conf | Sc | Prot N | Sequence              | Modifications   | Theor MW  | Theor m/z | z | ΔMass   |
|------|----|--------|-----------------------|-----------------|-----------|-----------|---|---------|
| 99   | 17 | 527    | ADDA.GLPGGAA.TGAGGGGN | ITRAQ@N-term    | 1628.7512 | 815.3829  | 2 | 0.0077  |
| <1   | 7  |        | MPGADALERVQSAER       | No ITRAQ@N-term | 1628.7940 | 815.4043  | 2 | -0.0351 |
| <1   | 6  |        | LSAGEEVDVETVPR        | No ITRAQ@N-term | 1628.7893 | 815.4019  | 2 | -0.0304 |
| <1   | 6  |        | MSGNTLTHDVAALGPER     | No ITRAQ@N-term | 1628.7576 | 815.3861  | 2 | 0.0013  |
| <1   | 6  |        | QAVGWEEGGGDFTR        | PGA of Q@N-term | 1628.7179 | 815.3662  | 2 | 0.0410  |

## Precursor MS Region

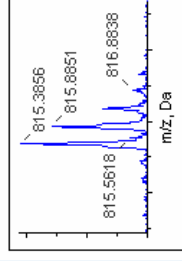

## Fragmentation Evidence for Peptide

ITR | ADDAGPGGAA.TGAGGGGN

| Res | b         | y         |
|-----|-----------|-----------|
| A   | 216.1465  | 1628.7585 |
| D   | 331.1734  | 1414.6193 |
| D   | 446.2003  | 1299.5924 |
| A   | 517.2375  | 1184.5654 |
| G   | 574.2589  | 1113.5283 |
| I   | 687.3430  | 1056.5069 |
| P   | 784.3957  | 943.4228  |
| G   | 841.4172  | 846.3700  |
| G   | 898.4387  | 789.3486  |
| A   | 969.4758  | 732.3271  |
| A   | 1040.5129 | 661.2900  |
| T   | 1141.5606 | 590.2529  |
| G   | 1198.5820 | 489.2052  |
| A   | 1269.6192 | 432.1837  |
| G   | 1326.6406 | 361.1466  |
| G   | 1383.6621 | 304.1252  |
| G   | 1440.6835 | 247.1037  |
| G   | 1497.7050 | 190.0822  |
| N   | 1611.7479 | 133.0608  |

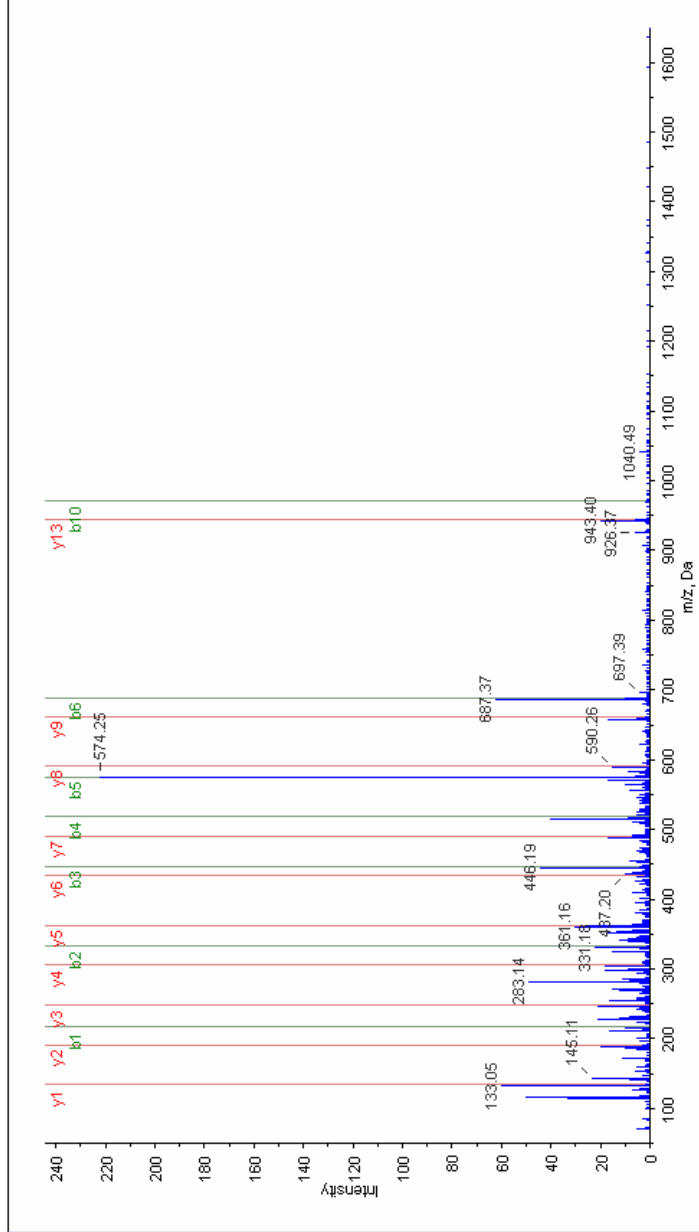

# Protein: SC05774, GluD [2 of 2]

Protein Quant

Protein ID

Spectra

Summary Statistics

## Spectrum List

| Spectrum      | Time   | Prec MW   | Prec m/z | Prec z | Best Sequence                                                                             | Modifications | Conf | Theor MW  | z | 115:114 | %Err  | 115:114 |
|---------------|--------|-----------|----------|--------|-------------------------------------------------------------------------------------------|---------------|------|-----------|---|---------|-------|---------|
| 10.1.1.1039.2 | 27.010 | 1628.7336 | 815.3741 | 2      | ADDA <sup>0</sup> GLP <sup>0</sup> GGAA <sup>0</sup> TGA <sup>0</sup> GGGG <sup>0</sup> N | ITRAQ@N-term  | 99   | 1628.7513 | 2 | 7.5631  | 40.41 | 116     |

## Peptide ID Hypotheses

| Conf | Sc | Prot N | Sequence                                                                                  | Modifications               | Theor MW  | Theor m/z | z | ΔMass   |
|------|----|--------|-------------------------------------------------------------------------------------------|-----------------------------|-----------|-----------|---|---------|
| 99   | 16 | 527    | ADDA <sup>0</sup> GLP <sup>0</sup> GGAA <sup>0</sup> TGA <sup>0</sup> GGGG <sup>0</sup> N | ITRAQ@N-term                | 1628.7513 | 815.3829  | 2 | -0.0176 |
| <1   | 8  |        | MPGADALERVQSAER                                                                           | No ITRAQ@N-term             | 1628.7941 | 815.4043  | 2 | -0.0604 |
| <1   | 7  |        | RGFIFGLLGPNGAGK                                                                           | No ITRAQ@N-term, ITRAQ@C... | 1628.9121 | 815.4633  | 2 | -0.1784 |
| <1   | 6  |        | GSRVVLGLNGAGK                                                                             | ITRAQ@N-term, Deamidatio... | 1628.9818 | 815.4981  | 2 | -0.2481 |
| <1   | 5  |        | AAFGEDLTWVYK                                                                              | ITRAQ@N-term, ITRAQ(K)@...  | 1628.9018 | 815.4581  | 2 | -0.1681 |

## Precursor MS Region

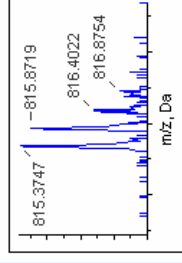

## Fragmentation Evidence for Peptide

ITR | ADDA<sup>0</sup>GLP<sup>0</sup>GGAA<sup>0</sup>TGA<sup>0</sup>GGGG<sup>0</sup>N

| Res | b         | y         |
|-----|-----------|-----------|
| A   | 216.1465  | 1628.7585 |
| D   | 331.1734  | 1414.6193 |
| D   | 446.2003  | 1299.5924 |
| A   | 517.2375  | 1184.5654 |
| G   | 574.2589  | 1113.5283 |
| I   | 687.3430  | 1056.5069 |
| P   | 784.3957  | 943.4228  |
| G   | 841.4172  | 846.3700  |
| G   | 898.4387  | 789.3486  |
| A   | 969.4758  | 732.3271  |
| A   | 1040.5129 | 661.2900  |
| T   | 1141.5606 | 590.2529  |
| G   | 1198.5820 | 489.2052  |
| A   | 1269.6192 | 432.1837  |
| G   | 1326.6406 | 361.1466  |
| G   | 1383.6621 | 304.1252  |
| G   | 1440.6835 | 247.1037  |
| G   | 1487.7050 | 190.0822  |
| N   | 1611.7479 | 133.0608  |

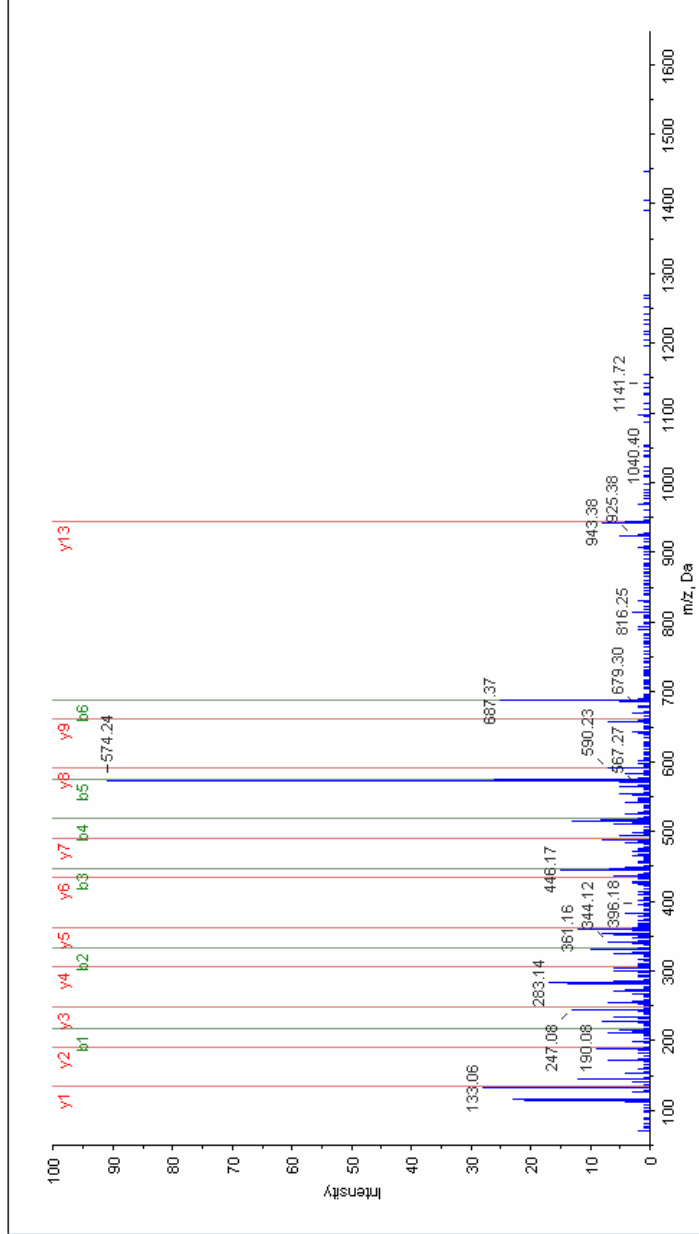

# Protein: SC05880, RedY [1 of 1]

Protein Quant

Protein ID

Spectra

Summary Statistics

## Spectrum List

| Spectrum      | Time   | Prec MW   | Prec m/z | Prec z | Best Sequence             | Modifications | Conf | Theor MW  | z | 115:114 | %Err 115:114 | 116 |
|---------------|--------|-----------|----------|--------|---------------------------|---------------|------|-----------|---|---------|--------------|-----|
| 29.1.1.1086.2 | 48.096 | 2988.3972 | 997.1397 | 3      | VSTEQDAPPHYFESISVTGDFEFSR | ITRAQ@N-term  | 99   | 2988.3698 | 3 |         |              |     |

## Peptide ID Hypotheses

| Conf | Sc | Prot ID | Sequence                   | Modifications   | Theor MW  | Theor m/z | z | ΔMass   |
|------|----|---------|----------------------------|-----------------|-----------|-----------|---|---------|
| 99   | 18 | 773     | VSTEQDAPPHYFESISVTGDFEFSR  | ITRAQ@N-term    | 2988.3698 | 997.1372  | 3 | 0.0074  |
| <1   | 6  |         | QYDDARHPYGRALSEAFPTIGDPASR | No ITRAQ@N-term | 2988.4477 | 997.1585  | 3 | -0.0505 |

## Precursor MS Region

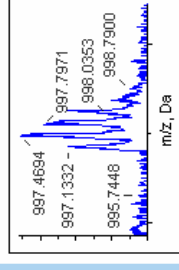

## Fragmentation Evidence for Peptide

ITR VSTEQDAPPHYFESISVTGDFEFSR

| Res | b         | y         |
|-----|-----------|-----------|
| V   | 244.1778  | 2989.3972 |
| S   | 331.2098  | 2746.2267 |
| T   | 432.2575  | 2659.1947 |
| E   | 561.3001  | 2558.1470 |
| Q   | 689.3586  | 2429.1044 |
| D   | 804.3856  | 2301.0459 |
| A   | 875.4227  | 2186.0189 |
| P   | 972.4755  | 2114.9818 |
| F   | 1119.5439 | 2017.9290 |
| H   | 1256.6028 | 1870.8606 |
| Y   | 1419.6661 | 1733.8017 |
| F   | 1566.7345 | 1570.7384 |
| E   | 1695.7771 | 1423.6700 |
| S   | 1782.8091 | 1294.6274 |
| I   | 1895.8932 | 1207.5953 |
| S   | 1982.9252 | 1094.5113 |
| V   | 2081.9936 | 1007.4793 |
| T   | 2183.0413 | 908.4108  |
| G   | 2240.0628 | 807.3632  |
| P   | 2337.1156 | 750.3417  |
| D   | 2452.1425 | 653.2889  |
| E   | 2581.1851 | 538.2620  |
| F   | 2728.2535 | 409.2194  |
| S   | 2815.2855 | 282.1510  |
| R   | 2971.3866 | 175.1190  |

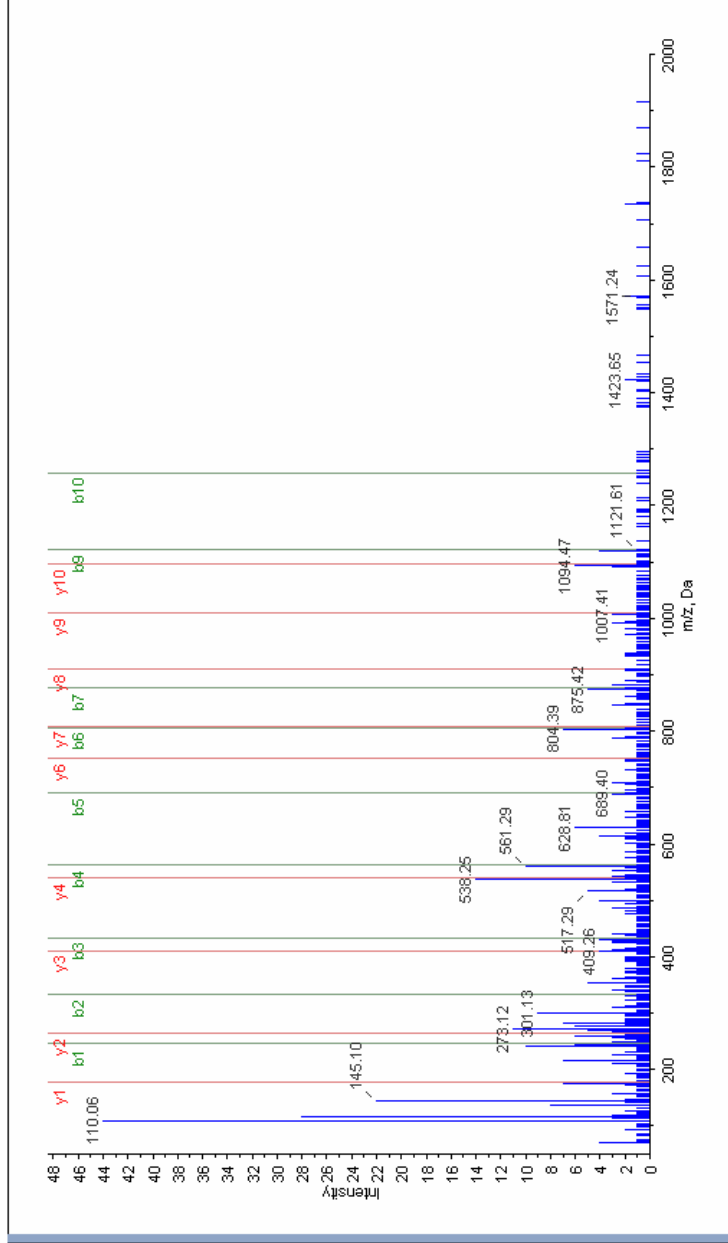

# Protein: SC05881, RedZ [1 of 1]

Protein Quant

Protein ID

Spectra

Summary Statistics

## Spectrum List

| Spectrum      | Time   | Prec MW   | Prec m/z | Prec z | Best Sequence       | Modifications | Conf | Theor MW  | z | 115:114 | %Err | 115:114 |
|---------------|--------|-----------|----------|--------|---------------------|---------------|------|-----------|---|---------|------|---------|
| 44.1.1.2524.3 | 56.058 | 1995.1188 | 666.0469 | 3      | AVLSAETSYVEE LVHVIR | ITRAQ@N-term  | 99   | 1995.1121 | 3 | 1.5388  | 6.53 | 116     |

## Peptide ID Hypotheses

| Conf | Sc | Prot N | Sequence             | Modifications   | Theor MW  | Theor m/z | z | ΔMass  |
|------|----|--------|----------------------|-----------------|-----------|-----------|---|--------|
| 99   | 14 | 539    | AVLSAETSYVEE LVHVIR  | ITRAQ@N-term    | 1995.1121 | 666.0447  | 3 | 0.0066 |
| <1   | 7  |        | TVAVGGNAEAAFLAGIDYPR | No ITRAQ@N-term | 1995.0973 | 666.0397  | 3 | 0.0215 |
| <1   | 6  |        | AAIDAVFEPDPHFLGPR    | ITRAQ@N-term    | 1995.0335 | 666.0184  | 3 | 0.0653 |
| <1   | 6  |        | ALEMFRGLADAIARR      | No ITRAQ@N-term | 1995.1125 | 666.0448  | 3 | 0.0063 |
| <1   | 5  |        | GGNRVAVTGALSLHGIVR   | ITRAQ@N-term    | 1995.0883 | 666.0367  | 3 | 0.0305 |

## Precursor MS Region

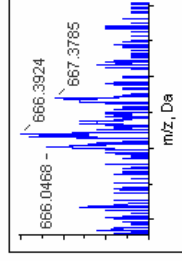

## Fragmentation Evidence for Peptide

ITR |AVLSAETSYVEE LVHVIR

| Residue | b         | y         |
|---------|-----------|-----------|
| A       | 216.1465  | 1996.1195 |
| V       | 315.2149  | 1780.9803 |
| L       | 428.2989  | 1681.9119 |
| S       | 515.3310  | 1568.8279 |
| A       | 586.3681  | 1481.7958 |
| E       | 715.4107  | 1410.7587 |
| T       | 816.4583  | 1281.7161 |
| S       | 903.4904  | 1180.6884 |
| V       | 1002.5588 | 1093.6364 |
| E       | 1131.6014 | 994.5680  |
| E       | 1260.6440 | 865.5254  |
| L       | 1373.7280 | 736.4828  |
| V       | 1472.7965 | 623.3988  |
| H       | 1609.8554 | 524.3303  |
| V       | 1708.9238 | 387.2714  |
| I       | 1822.0078 | 288.2030  |
| R       | 1978.1090 | 175.1190  |

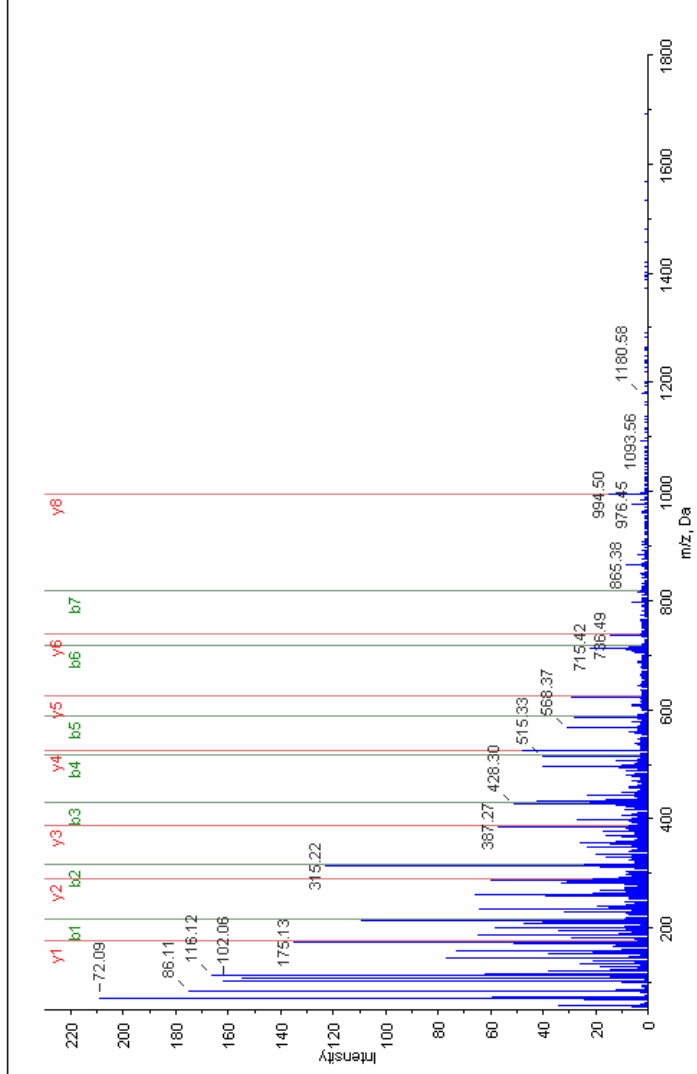

# Protein: SC05882, RedX, RedV [1 of 1]

Protein Quant

Protein ID

Spectra

Summary Statistics

## Spectrum List

| Spectrum      | Time   | Prec MW   | Prec m/z | Prec z | Best Sequence       | Modifications | Conf | Theor MW  | z | 115:114 | %Err | 115:114 |
|---------------|--------|-----------|----------|--------|---------------------|---------------|------|-----------|---|---------|------|---------|
| 77.1.1.2229.2 | 42.282 | 2054.0268 | 685.6829 | 3      | DLEEPAITPGATAHFVHLR | ITRAQ@N-term  | 99   | 2054.0668 | 3 | 3.2294  | 5.62 | 116     |

## Peptide ID Hypotheses

| Conf | Sc | Prot ID | Sequence                   | Modifications             | Theor MW  | Theor m/z | z | ΔMass   |
|------|----|---------|----------------------------|---------------------------|-----------|-----------|---|---------|
| 99   | 14 | 508     | DLEEPAITPGATAHFVHLR        | ITRAQ@N-term              | 2054.0668 | 685.6862  | 3 | -0.0400 |
| <1   | 7  |         | VGVA GRR LGVH GCH EVD LR   | No ITRAQ@N-term           | 2054.1247 | 685.7155  | 3 | -0.0979 |
| <1   | 6  |         | AD EWF LYD QES PI A TG GR  | No ITRAQ@N-term           | 2053.9383 | 685.6534  | 3 | 0.0866  |
| <1   | 6  |         | DGGP AVT SRAQ ART AA EAV R | No ITRAQ@N-term           | 2054.0618 | 685.6945  | 3 | -0.0350 |
| <1   | 6  |         | ECVEA AAL AR VP VEP LGTV R | No ITRAQ@N-term, MMTS(... | 2054.0654 | 685.6958  | 3 | -0.0385 |

## Precursor MS Region

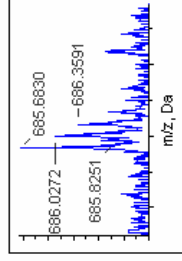

## Fragmentation Evidence for Peptide

ITR DLEEPAITPGATAHFVHLR

| Residue | b         | y         |
|---------|-----------|-----------|
| D       | 260.1363  | 2055.0740 |
| L       | 373.2203  | 1795.9450 |
| E       | 502.2629  | 1682.8609 |
| E       | 631.3055  | 1553.8183 |
| P       | 728.3583  | 1424.7757 |
| A       | 799.3954  | 1327.7229 |
| T       | 900.4431  | 1256.6658 |
| P       | 987.4959  | 1155.6382 |
| G       | 1054.5173 | 1058.5954 |
| A       | 1125.5544 | 1001.5639 |
| T       | 1226.6021 | 930.5268  |
| A       | 1297.6392 | 829.4791  |
| H       | 1434.6981 | 758.4420  |
| P       | 1531.7509 | 621.3831  |
| V       | 1630.8193 | 524.3303  |
| H       | 1767.8782 | 425.2619  |
| L       | 1880.9623 | 288.2030  |
| R       | 2037.0634 | 175.1190  |

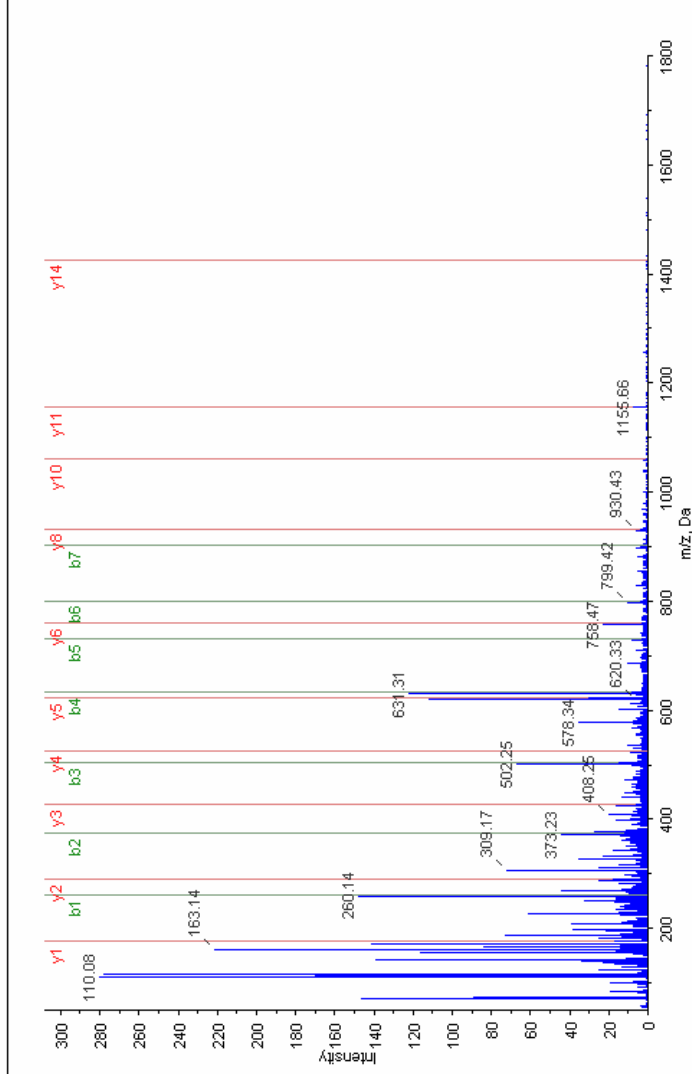

# Protein: SC06222 [1 of 1]

Protein Quant

Protein ID

Spectra

Summary Statistics

## Spectrum List

| Spectrum      | Time   | Prec MW   | Prec m/z | Prec z | Best Sequence    | Modifications | Conf | Theor MW  | z | 115:114 | %Err  | 115:114 |
|---------------|--------|-----------|----------|--------|------------------|---------------|------|-----------|---|---------|-------|---------|
| 50.1.1.1053.3 | 44.377 | 1865.0359 | 622.6859 | 3      | ILTLPHAEDELAAIGR | ITRAQ@N-term  | 99   | 1862.0382 | 3 | 0.6375  | 13.23 | 116     |

## Peptide ID Hypotheses

| Conf | Sc | Prot N | Sequence          | Modifications              | Theor MW  | Theor m/z | z | ΔMass   |
|------|----|--------|-------------------|----------------------------|-----------|-----------|---|---------|
| 99   | 18 | 914    | ILTLPHAEDELAAIGR  | ITRAQ@N-term               | 1862.0382 | 621.6867  | 3 | 2.9976  |
| <1   | 14 | 13     | TLLEVAQHLDGLVR    | ITRAQ@N-term               | 1865.0491 | 622.6903  | 3 | -0.0133 |
| <1   | 6  | 88     | IASGELTAVQTEAHLAR | No ITRAQ@N-term            | 1865.0006 | 622.6741  | 3 | 0.0353  |
| <1   | 6  | 513    | AAHGLADDLTWTLTAR  | No ITRAQ@N-term            | 1865.0006 | 622.6741  | 3 | 0.0353  |
| <1   | 8  |        | GSVITAKQMDYVQAAR  | No ITRAQ@N-term, ITRAQ@... | 1864.9754 | 622.6660  | 3 | 0.0595  |

## Precursor MS Region

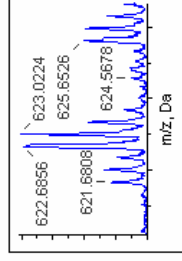

## Fragmentation Evidence for Peptide

ITR | ILTLPHAEDELAAIGR

| Res | b         | y         |
|-----|-----------|-----------|
| I   | 258.1934  | 1863.0456 |
| L   | 371.2775  | 1605.8595 |
| T   | 472.3251  | 1492.7754 |
| L   | 585.4092  | 1391.7278 |
| P   | 682.4620  | 1278.6437 |
| H   | 819.5209  | 1181.5909 |
| A   | 890.5580  | 1044.5320 |
| E   | 1019.6006 | 973.4949  |
| D   | 1134.6275 | 844.4623  |
| L   | 1247.7116 | 729.4254  |
| E   | 1376.7542 | 616.3413  |
| A   | 1447.7913 | 487.2987  |
| A   | 1518.8284 | 416.2616  |
| I   | 1631.9125 | 345.2245  |
| G   | 1688.9339 | 232.1404  |
| R   | 1845.0351 | 175.1190  |

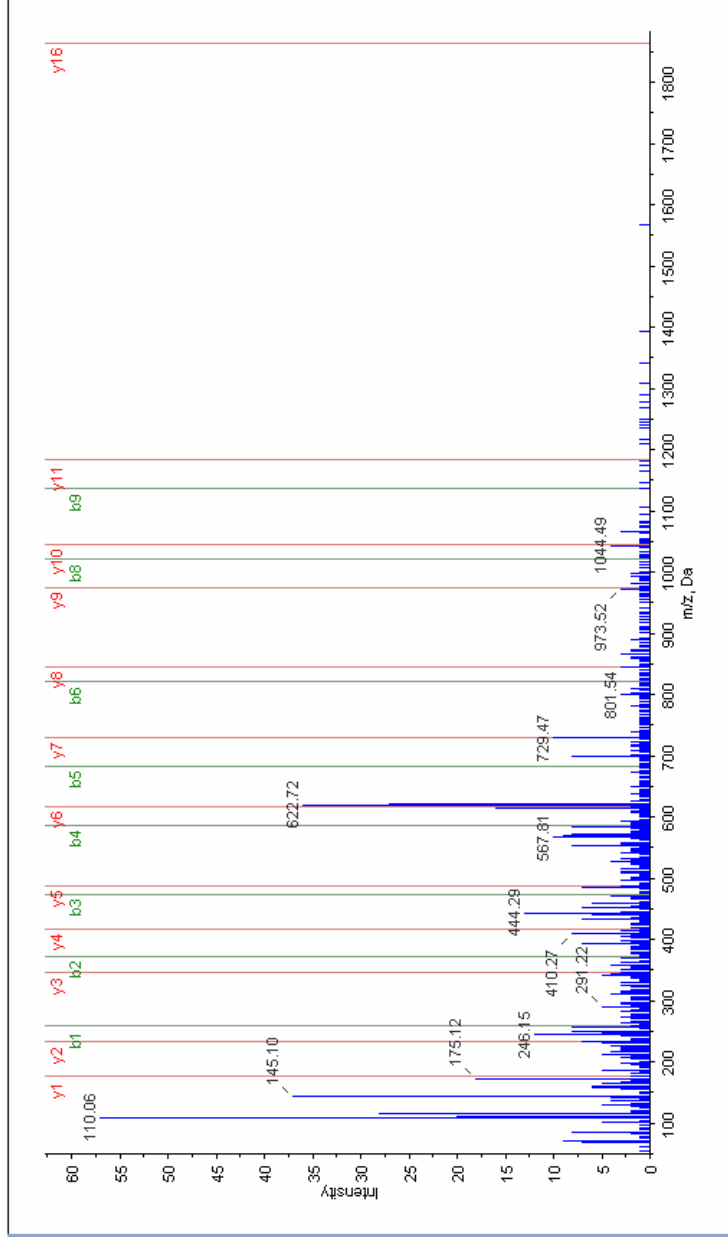



# Protein: SC06286 [1 of 1]

Protein Quant

Protein ID

Spectra

Summary Statistics

## Spectrum List

| Spectrum      | Time   | Prec MW   | Prec m/z | Prec z | Best Sequence                                             | Modifications | Conf | Theor MW  | z | 115:114 | %Err | 115:114 |
|---------------|--------|-----------|----------|--------|-----------------------------------------------------------|---------------|------|-----------|---|---------|------|---------|
| 16.1.1.1091.5 | 34.917 | 2504.2671 | 835.7630 | 3      | ISADNGTGPVAPEGTSAPGGVVP...<br>ITRAQ@N-Herm, Deamidatio... |               | 99   | 2504.2629 | 3 |         |      | 116     |

## Peptide ID Hypotheses

| Conf | Sc | Prot N | Sequence                  | Modifications               | Theor MW  | Theor m/z | z | ΔMass   |
|------|----|--------|---------------------------|-----------------------------|-----------|-----------|---|---------|
| 99   | 16 | 977    | ISADNGTGPVAPEGTSAPGGVVPGR | ITRAQ@N-Herm, Deamidatio... | 2504.2629 | 835.7616  | 3 | 0.0042  |
| <1   | 7  |        | DPATYDMMTVVTVGNTATRELAGR  | No ITRAQ@N-Herm             | 2504.2363 | 835.7527  | 3 | 0.0308  |
| <1   | 5  |        | ERLVSEAEALSINSTDMGPTAAR   | ITRAQ@N-Herm, Deamidatio... | 2504.2265 | 835.7495  | 3 | 0.0406  |
| <1   | 5  |        | LVGGCCRVGPEPITTSIARALPR   | ITRAQ@N-Herm, MMTS(C)@...   | 2504.2970 | 835.7729  | 3 | -0.0299 |
| <1   | 5  |        | TYPNVTIEGRSTPGQCLEPPR     | ITRAQ@N-Herm, MMTS(C)@...   | 2504.2274 | 835.7497  | 3 | 0.0397  |

## Precursor MS Region

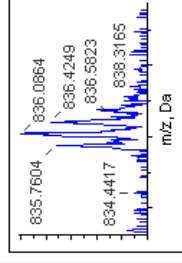

## Fragmentation Evidence for Peptide

ITR | ISADNIDeaIGTGPVAPEGTSAPGGVVPGR

| Res | b         | y       |
|-----|-----------|---------|
| I   | 256.1934  | 2505.27 |
| S   | 345.2254  | 2248.08 |
| A   | 416.2625  | 2161.05 |
| D   | 531.2895  | 2090.01 |
| NQ  | 646.3164  | 1974.98 |
| G   | 703.3379  | 1859.96 |
| T   | 804.3856  | 1802.93 |
| G   | 861.4070  | 1701.89 |
| P   | 959.4598  | 1644.87 |
| V   | 1057.5282 | 1547.81 |
| A   | 1128.5653 | 1448.74 |
| P   | 1225.6181 | 1377.71 |
| E   | 1354.6607 | 1280.65 |
| G   | 1411.6821 | 1151.61 |
| T   | 1512.7298 | 1094.59 |
| S   | 1599.7619 | 993.54  |
| A   | 1670.7990 | 906.51  |
| P   | 1767.8517 | 835.47  |
| G   | 1824.8732 | 736.42  |
| G   | 1881.8947 | 681.40  |
| V   | 1980.9631 | 624.38  |
| V   | 2060.0315 | 525.31  |
| P   | 2177.0843 | 426.24  |
| G   | 2234.1057 | 329.19  |
| D   | 2321.1551 | 275.13  |

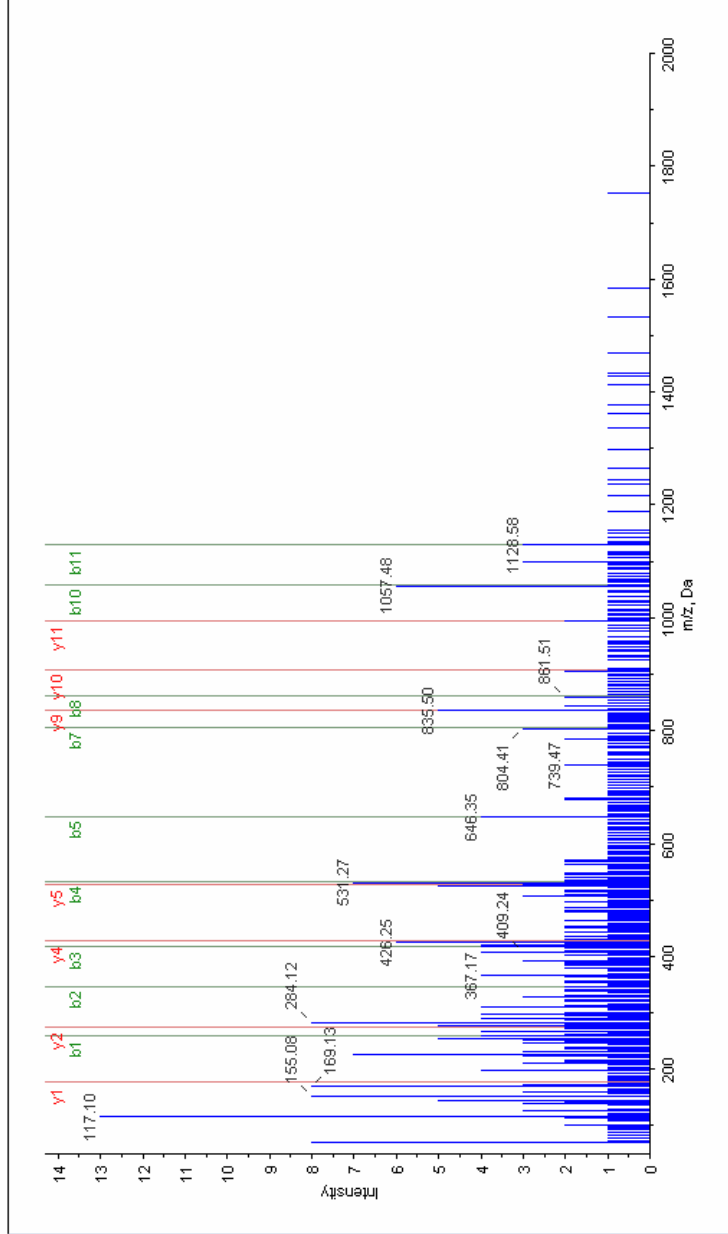

# Protein: SCO7638, Eno2 [1 of 1]

Protein Quant

Protein ID

Spectra

Summary Statistics

## Spectrum List

| Spectrum      | Time   | Prec MW   | Prec m/z | Prec z | Best Sequence         | Modifications | Conf | Theor MW  | z | 115:114 | %Err  | 115:114 |
|---------------|--------|-----------|----------|--------|-----------------------|---------------|------|-----------|---|---------|-------|---------|
| 30.1.1.1036.3 | 39.126 | 2254.1643 | 752.3954 | 3      | DLLAAGHSTGVDEGGFAPALR | ITRAQ@N-term  | 99   | 2254.1463 | 3 | 0.9177  | 19.07 | 116     |

## Peptide ID Hypotheses

| Conf | Sc | Prot N | Sequence               | Modifications           | Theor MW  | Theor m/z | z | ΔMass   |
|------|----|--------|------------------------|-------------------------|-----------|-----------|---|---------|
| 99   | 20 | 814    | DLLAAGHSTGVDEGGFAPALR  | ITRAQ@N-term            | 2254.1463 | 752.3894  | 3 | 0.0180  |
| <1   | 8  |        | AAGTLFACGALGMLAGDYTIQR | ITRAQ@N-term, NMTS(C)@8 | 2254.1393 | 752.3871  | 3 | 0.0250  |
| <1   | 8  |        | HYFGDCIDPFPVPGMGPAEERR | ITRAQ@N-term            | 2254.1398 | 752.3872  | 3 | 0.0245  |
| <1   | 7  |        | LDSPALATVADAVVTAADALR  | ITRAQ@N-term            | 2254.2290 | 752.4169  | 3 | -0.0647 |
| <1   | 7  |        | LRDAGRSLVYVSHLAYDIDR   | No ITRAQ@N-term         | 2254.2181 | 752.4134  | 3 | -0.0538 |

## Precursor MS Region

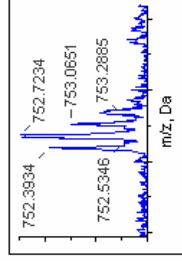

## Fragmentation Evidence for Peptide

ITR DLLAAGHSTGVDEGGFAPALR

| Res | b         | y         |
|-----|-----------|-----------|
| D   | 260.1363  | 2255.1537 |
| L   | 373.2203  | 1996.0247 |
| L   | 486.3044  | 1882.9406 |
| A   | 557.3415  | 1769.8565 |
| A   | 628.3786  | 1698.8194 |
| G   | 685.4001  | 1627.7823 |
| H   | 822.4590  | 1570.7608 |
| S   | 909.4910  | 1433.7019 |
| T   | 1010.5387 | 1346.6699 |
| G   | 1067.5602 | 1245.6222 |
| V   | 1166.6286 | 1188.6008 |
| G   | 1223.6501 | 1089.5323 |
| D   | 1338.6770 | 1032.5109 |
| E   | 1467.7196 | 917.4839  |
| G   | 1524.7411 | 788.4413  |
| G   | 1581.7625 | 731.4199  |
| F   | 1728.8309 | 674.3964  |
| A   | 1799.8681 | 527.3300  |
| P   | 1896.9208 | 466.2929  |
| A   | 1967.9579 | 369.2401  |
| L   | 2081.0420 | 288.2030  |
| R   | 2237.1431 | 175.1190  |

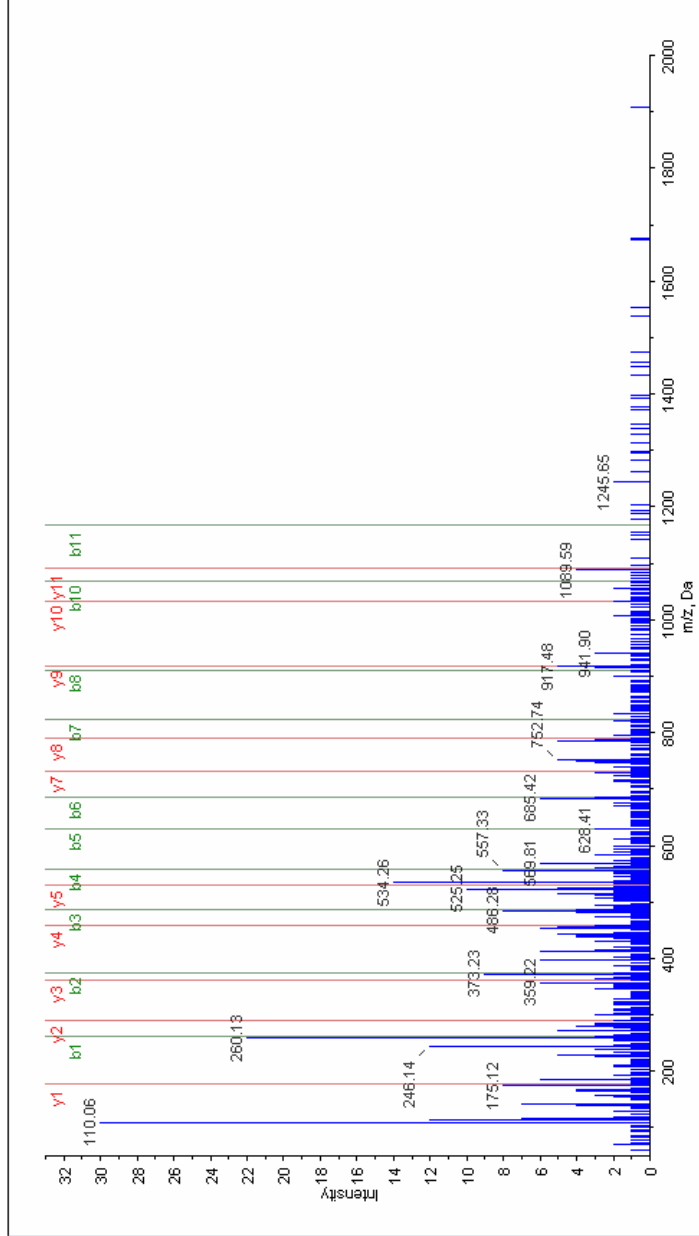

Supplement: pone.0002097.s004.pdf [file pone.0002097.s004.pdf]
