# Supplementary material for: Uncovering Genes with Divergent mRNA-Protein Dynamics in Streptomyces coelicolor
Source: PubMed Central journal article supplement (PMC2367054; doi:10.1371/journal.pone.0002097), 2008-05-07
Supplement: pone.0002097.s002.pdf [file pone.0002097.s002.pdf]

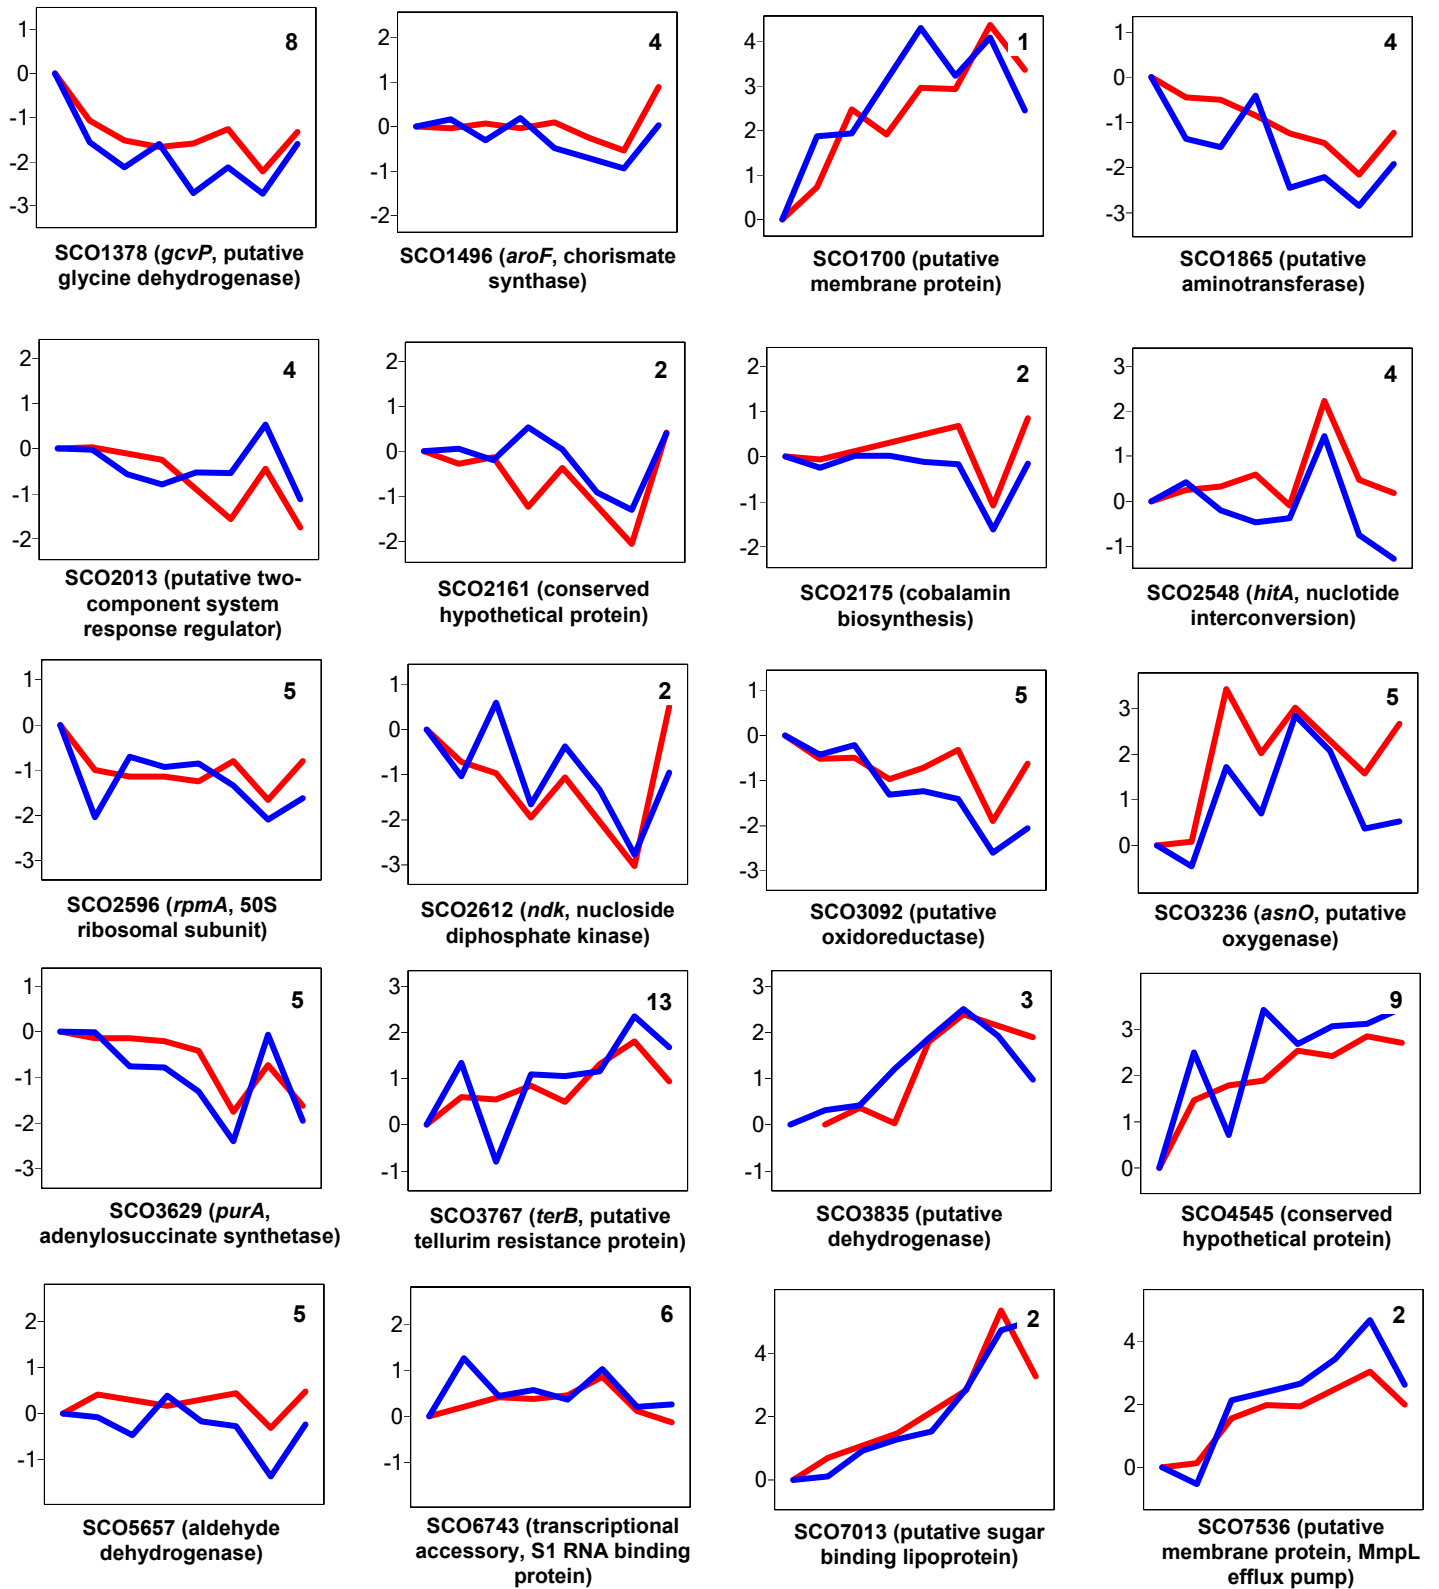

**Figure S2:** Examples of some genes exhibiting good correlation between mRNA (blue) and protein (red) profiles. The horizontal axis corresponds to time spanning from 7 h to 38 h while the vertical axis corresponds to log<sub>2</sub> expression ratio relative to 7 h sample. The numbers on the top right indicate the total number of unique peptide hits supporting each protein identification.
