# Supplementary material for: Uncovering Genes with Divergent mRNA-Protein Dynamics in Streptomyces coelicolor
Source: PubMed Central journal article supplement (PMC2367054; doi:10.1371/journal.pone.0002097), 2008-05-07

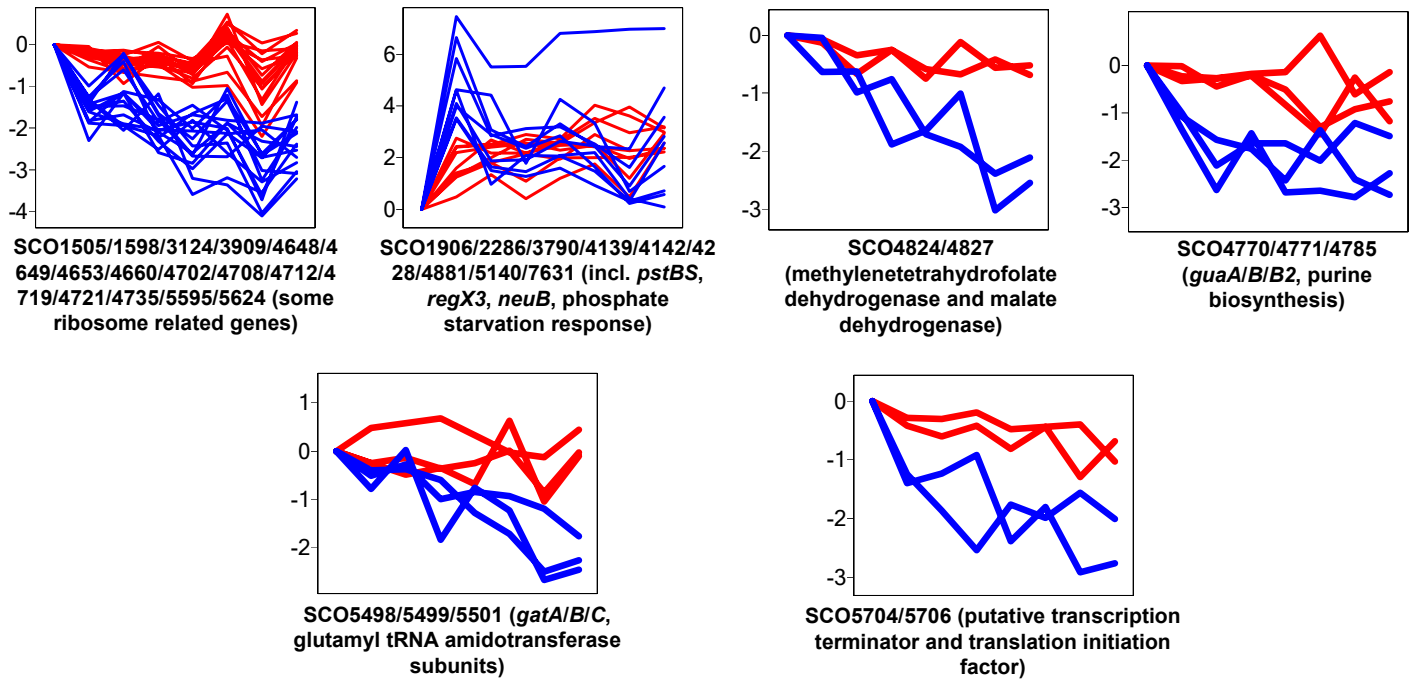

**Figure S3(a):** Additional examples of functionally or chromosomally clustered genes exhibiting discordant mRNA (blue) and protein (red) dynamics. The horizontal axis corresponds to time spanning from 7 h to 38 h while the vertical axis corresponds to  $\log_2$  expression ratio relative to 7 h sample.

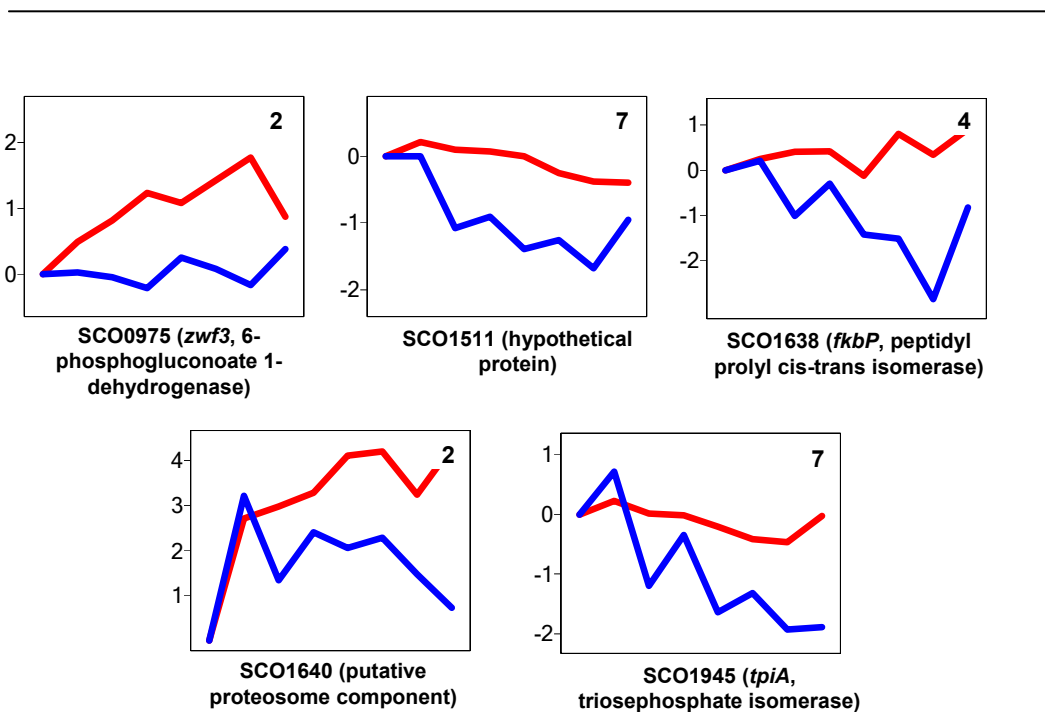

**Figure S3(b):** Examples of isolated genes that could not be clustered as functional groups exhibiting discordant mRNA (blue) and protein (red) dynamics. The horizontal axis corresponds to time spanning from 7 h to 38 h while the vertical axis corresponds to  $\log_2$  expression ratio relative to 7 h sample. The numbers on the top right indicate the total number of unique peptide hits supporting each protein identification. Figure continued on next page.

Figure S3(b) (continued)

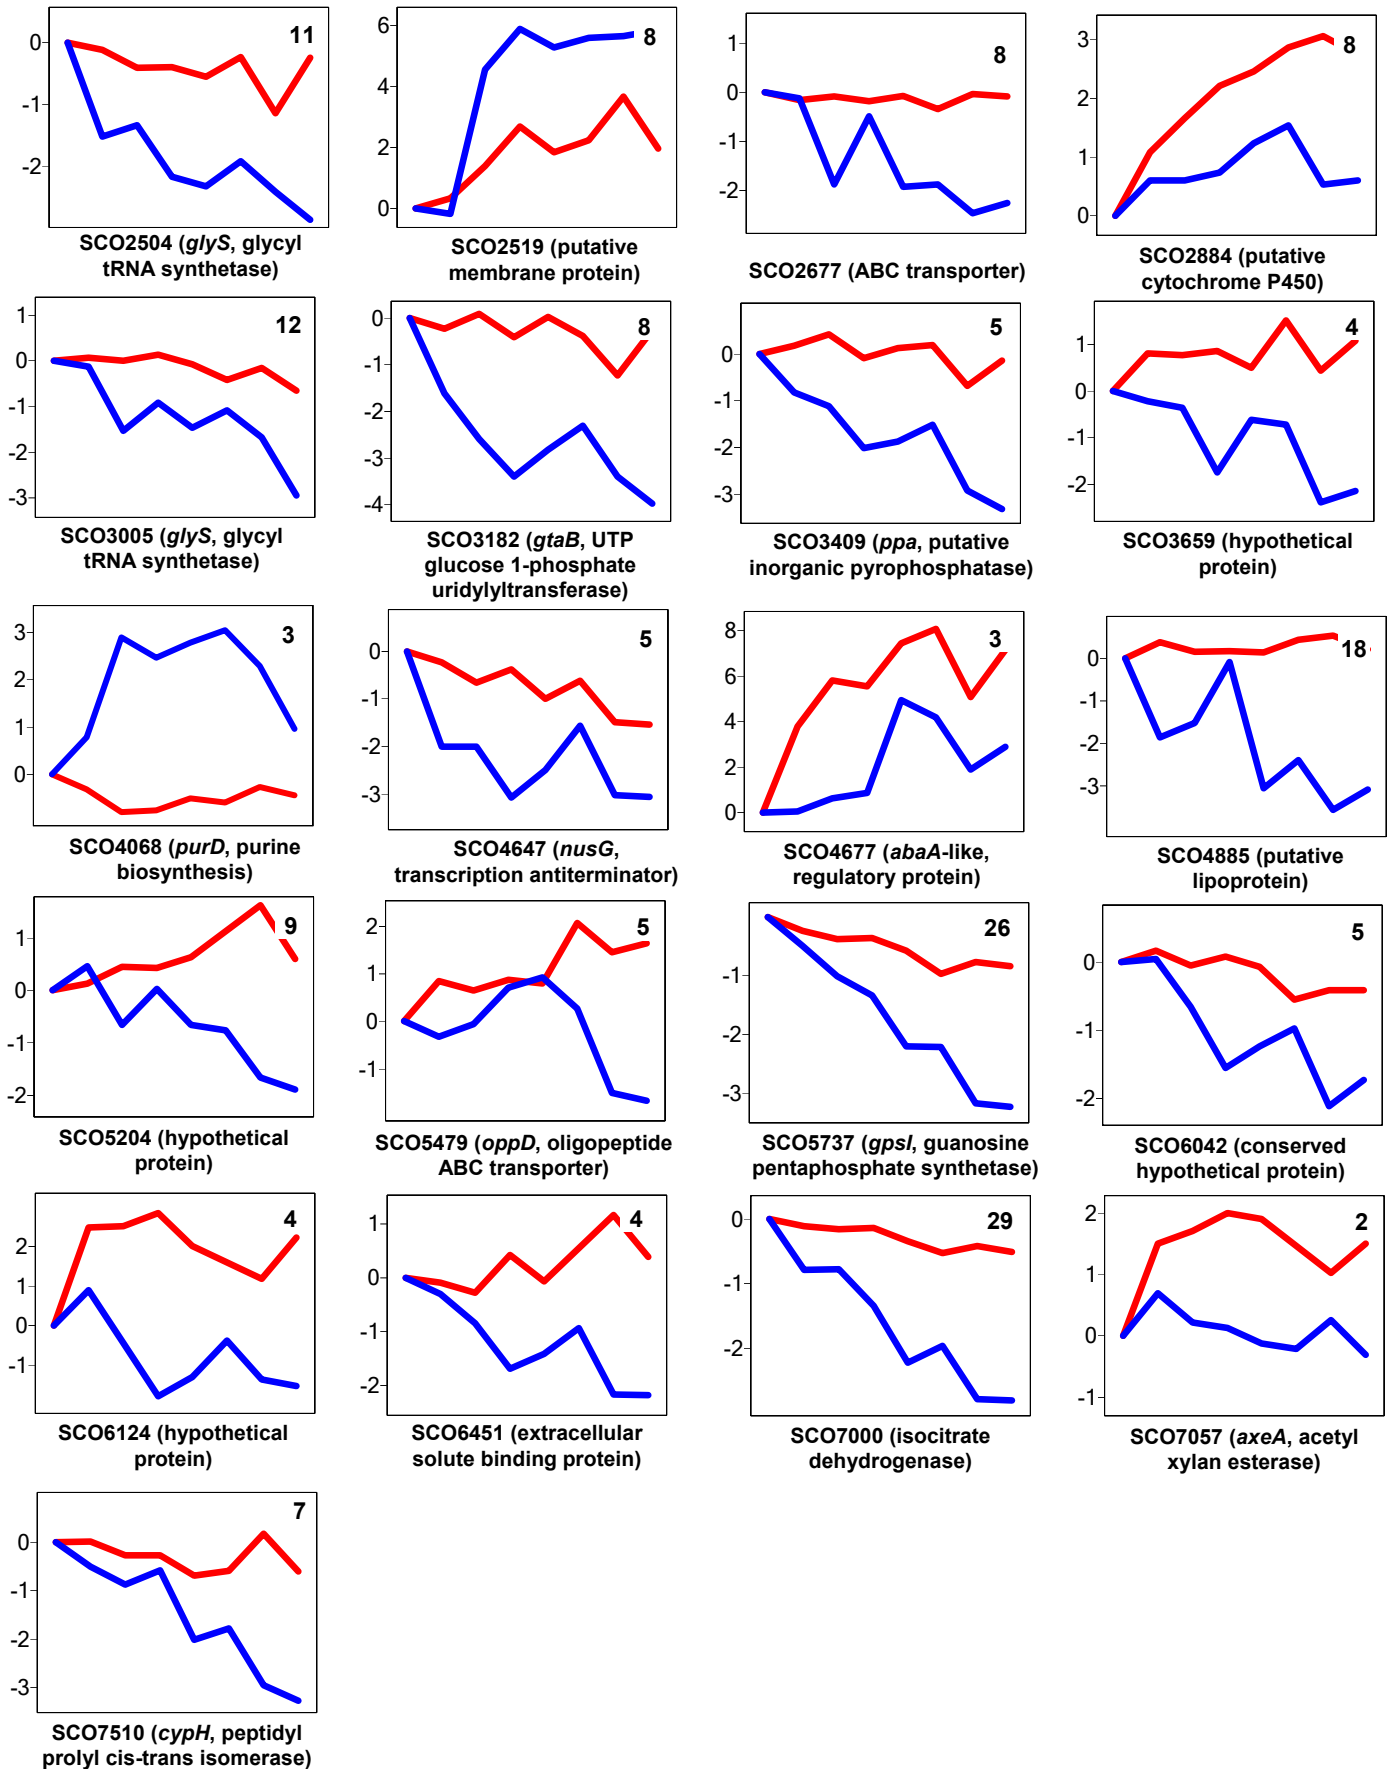

Supplement: pone.0002097.s003.pdf [file pone.0002097.s003.pdf]
